# Supplementary material
Source: ML conference proceedings conference paper supplement (https://aclanthology.org/2020.alw-1.9)
Supplement: OptionalSupplementaryMaterial [file 2020.alw-1.9.OptionalSupplementaryMaterial.zip]

Archive with 6 entries (6 files):
- main.bib
- main.tex
- emnlp2020.sty
- acl_natbib.bst
- emnlp2020-templates/anthology.bib
- emnlp2020-templates/emnlp2020.pdf
