# Supplementary material
Source: ML conference proceedings conference paper supplement (https://aclanthology.org/2020.alw-1.9)
Supplement: OptionalSupplementaryMaterial [file 2020.alw-1.9.OptionalSupplementaryMaterial.zip › emnlp2020-templates/anthology.bib]

@proceedings{rocling-ijclclp-2002-international,
    title = "International Journal of Computational Linguistics {\&} {C}hinese Language Processing, Volume 7, Number 1, {F}ebruary 2002: Special Issue on {H}ow{N}et and Its Applications",
    month = feb,
    year = "2002",
}
@inproceedings{tseng-etal-2002-yi,
    title = "以構詞律與相似法為本的中文動詞自動分類研究 (A Hybrid Approach for Automatic Classification of {C}hinese Unknown Verbs) [In {C}hinese]",
    author = "Tseng, Hui-Hsin  and
      Liu, Chao-Lin  and
      Gao, Zhao-Ming  and
      Chen, Keh-Jiann",
    booktitle = "International Journal of Computational Linguistics {\&} {C}hinese Language Processing, Volume 7, Number 1, {F}ebruary 2002: Special Issue on {H}ow{N}et and Its Applications",
    month = feb,
    year = "2002",
    url = "https://www.aclweb.org/anthology/O02-1001",
    pages = "1--28",
}
@inproceedings{tsai-etal-2002-word,
    title = "Word Sense Disambiguation and Sense-Based {NV} Event Frame Identifier",
    author = "Tsai, Jia-Lin  and
      Hsu, Wen-Lian  and
      Su, Jeng-Woei",
    booktitle = "International Journal of Computational Linguistics {\&} {C}hinese Language Processing, Volume 7, Number 1, {F}ebruary 2002: Special Issue on {H}ow{N}et and Its Applications",
    month = feb,
    year = "2002",
    url = "https://www.aclweb.org/anthology/O02-1002",
    pages = "29--46",
}
@inproceedings{yang-li-2002-yi,
    title = "一種基於知網的語義排歧模型研究 (A Study of Semantic Disambiguation Based on {H}ow{N}et) [In {C}hinese]",
    author = "Yang, Xiaofeng  and
      Li, Tangqiu",
    booktitle = "International Journal of Computational Linguistics {\&} {C}hinese Language Processing, Volume 7, Number 1, {F}ebruary 2002: Special Issue on {H}ow{N}et and Its Applications",
    month = feb,
    year = "2002",
    url = "https://www.aclweb.org/anthology/O02-1003",
    pages = "47--78",
}
@inproceedings{su-etal-2002-ji,
    title = "基於文本概念和k{NN}的跨語種文本過濾 (Cross-Language Text Filtering Based on Text Concepts and k{NN}) [In {C}hinese",
    author = "Su, Weifeng  and
      Li, Shaozi  and
      Li, Tanqiu  and
      You, Wenjian",
    booktitle = "International Journal of Computational Linguistics {\&} {C}hinese Language Processing, Volume 7, Number 1, {F}ebruary 2002: Special Issue on {H}ow{N}et and Its Applications",
    month = feb,
    year = "2002",
    url = "https://www.aclweb.org/anthology/O02-1004",
    pages = "79--90",
}
@proceedings{rocling-ijclclp-2002-international-journal,
    title = "International Journal of Computational Linguistics {\&} {C}hinese Language Processing, Volume 7, Number 2, August 2002: Special Issue on Computational {C}hinese Lexical Semantics",
    month = aug,
    year = "2002",
}
@inproceedings{chen-etal-2002-qing,
    title = "情境{---}{---}組織/存放辭彙語義知識的恰當框架 (Situation {--} A Suitable Framework for Organizing and Positioning Lexical Semantic Knowledge) [In {C}hinese]",
    author = "Chen, Zusun  and
      Zhou, Qiang  and
      Zhao, Qiang",
    booktitle = "International Journal of Computational Linguistics {\&} {C}hinese Language Processing, Volume 7, Number 2, August 2002: Special Issue on Computational {C}hinese Lexical Semantics",
    month = aug,
    year = "2002",
    url = "https://www.aclweb.org/anthology/O02-2001",
    pages = "1--36",
}
@inproceedings{chen-you-2002-study,
    title = "A Study on Word Similarity using Context Vector Models",
    author = "Chen, Keh-Jiann  and
      You, Jia-Ming",
    booktitle = "International Journal of Computational Linguistics {\&} {C}hinese Language Processing, Volume 7, Number 2, August 2002: Special Issue on Computational {C}hinese Lexical Semantics",
    month = aug,
    year = "2002",
    url = "https://www.aclweb.org/anthology/O02-2002",
    pages = "37--58",
}
@inproceedings{liu-li-2002-ji,
    title = "基於《知網》的辭彙語義相似度計算 (Word Similarity Computing Based on How-net) [In {C}hinese]",
    author = "Liu, Qun  and
      Li, Sujian",
    booktitle = "International Journal of Computational Linguistics {\&} {C}hinese Language Processing, Volume 7, Number 2, August 2002: Special Issue on Computational {C}hinese Lexical Semantics",
    month = aug,
    year = "2002",
    url = "https://www.aclweb.org/anthology/O02-2003",
    pages = "59--76",
}
@inproceedings{wang-2002-ji,
    title = "基於組合特徵的漢語名詞詞義消歧 (A Study on Noun Sense Disambiguation Based on Syntagmatic Features) [In {C}hinese]",
    author = "Wang, Hui",
    booktitle = "International Journal of Computational Linguistics {\&} {C}hinese Language Processing, Volume 7, Number 2, August 2002: Special Issue on Computational {C}hinese Lexical Semantics",
    month = aug,
    year = "2002",
    url = "https://www.aclweb.org/anthology/O02-2004",
    pages = "77--88",
}
@inproceedings{kang-2002-xian,
    title = "《現代漢語新詞語資訊電子詞典》的研究與實現 (Development and Study of the {``}Modern {C}hinese New Words Information Electronic Dictionary{''}) [In {C}hinese]",
    author = "Kang, Shiyong",
    booktitle = "International Journal of Computational Linguistics {\&} {C}hinese Language Processing, Volume 7, Number 2, August 2002: Special Issue on Computational {C}hinese Lexical Semantics",
    month = aug,
    year = "2002",
    url = "https://www.aclweb.org/anthology/O02-2005",
    pages = "89--100",
}
@inproceedings{song-xu-2002-ji,
    title = "基於詞彙語義的百科辭典知識提取實驗 (An Experiment on Knowledge Extraction from an Encyclopedia Based on Lexicon Semantics) [In {C}hinese]",
    author = "Song, Rou  and
      Xu, Yong",
    booktitle = "International Journal of Computational Linguistics {\&} {C}hinese Language Processing, Volume 7, Number 2, August 2002: Special Issue on Computational {C}hinese Lexical Semantics",
    month = aug,
    year = "2002",
    url = "https://www.aclweb.org/anthology/O02-2006",
    pages = "101--112",
}
@proceedings{rocling-ijclclp-2016-linguistics,
    title = "Proceedings of the 28th Conference on Computational Linguistics and Speech Processing ({ROCLING} 2016)",
    author = "Wu, Chung-Hsien  and
      Tseng, Yuen-Hsien  and
      Kao, Hung-Yu",
    month = oct,
    year = "2016",
    address = "Tainan, Taiwan",
    publisher = "The Association for Computational Linguistics and Chinese Language Processing (ACLCLP)",
    url = "https://www.aclweb.org/anthology/O16-1000",
}
@inproceedings{hsu-etal-2016-ping,
    title = "評估尺度相關最佳化方法於華語錯誤發音檢測之研究(Evaluation Metric-related Optimization Methods for {M}andarin Mispronunciation Detection) [In {C}hinese]",
    author = "Hsu, Yao-Chi  and
      Yang, Ming-Han  and
      Hung, Hsiao-Tsung  and
      Lin, Yi-Ju  and
      Chen, Berlin",
    booktitle = "Proceedings of the 28th Conference on Computational Linguistics and Speech Processing ({ROCLING} 2016)",
    month = oct,
    year = "2016",
    address = "Tainan, Taiwan",
    publisher = "The Association for Computational Linguistics and Chinese Language Processing (ACLCLP)",
    url = "https://www.aclweb.org/anthology/O16-1001",
    pages = "1--3",
}
@inproceedings{yang-etal-2016-rong,
    title = "融合多任務學習類神經網路聲學模型訓練於會議語音辨識之研究(Leveraging Multi-task Learning with Neural Network Based Acoustic Modeling for Improved Meeting Speech Recognition) [In {C}hinese]",
    author = "Yang, Ming-Han  and
      Hsu, Yao-Chi  and
      Hung, Hsiao-Tsung  and
      Chen, Ying-Wen  and
      Chen, Berlin  and
      Chen, Kuan-Yu",
    booktitle = "Proceedings of the 28th Conference on Computational Linguistics and Speech Processing ({ROCLING} 2016)",
    month = oct,
    year = "2016",
    address = "Tainan, Taiwan",
    publisher = "The Association for Computational Linguistics and Chinese Language Processing (ACLCLP)",
    url = "https://www.aclweb.org/anthology/O16-1002",
    pages = "4--6",
}
@inproceedings{yan-etal-2016-shi,
    title = "使用字典學習法於強健性語音辨識(The Use of Dictionary Learning Approach for Robustness Speech Recognition) [In {C}hinese]",
    author = "Yan, Bi-Cheng  and
      Shih, Chin-Hong  and
      Liu, Shih-Hung  and
      Chen, Berlin",
    booktitle = "Proceedings of the 28th Conference on Computational Linguistics and Speech Processing ({ROCLING} 2016)",
    month = oct,
    year = "2016",
    address = "Tainan, Taiwan",
    publisher = "The Association for Computational Linguistics and Chinese Language Processing (ACLCLP)",
    url = "https://www.aclweb.org/anthology/O16-1003",
    pages = "7--9",
}
@inproceedings{chan-chen-2016-yi,
    title = "以多層感知器辨識情緒於國台客語料庫 (Use Multilayer Perceptron To Recognize Emotion in {M}andarin,{T}aiwanese and {H}akka Database) [In {C}hinese]",
    author = "Chan, Chia-Hsien  and
      Chen, Chia-Ping",
    booktitle = "Proceedings of the 28th Conference on Computational Linguistics and Speech Processing ({ROCLING} 2016)",
    month = oct,
    year = "2016",
    address = "Tainan, Taiwan",
    publisher = "The Association for Computational Linguistics and Chinese Language Processing (ACLCLP)",
    url = "https://www.aclweb.org/anthology/O16-1004",
    pages = "10--21",
}
@inproceedings{huang-etal-2016-vdao,
    title = "「{V}到」結構的合分詞及語意區分(Word segmentation and sense representation for V-dao structure in {C}hinese)[In {C}hinese]",
    author = "Huang, Shu-Ling  and
      Li, Shi-Min  and
      Bai, Ming-Hong  and
      Wu, Jian-Cheng  and
      Wang, Ying-Ni  and
      Lin, Qing-Long",
    booktitle = "Proceedings of the 28th Conference on Computational Linguistics and Speech Processing ({ROCLING} 2016)",
    month = oct,
    year = "2016",
    address = "Tainan, Taiwan",
    publisher = "The Association for Computational Linguistics and Chinese Language Processing (ACLCLP)",
    url = "https://www.aclweb.org/anthology/O16-1005",
    pages = "22--34",
}
@inproceedings{kung-etal-2016-ge,
    title = "歌詞演唱錯誤偵測(Automatic Sung Lyrics Verification)[In {C}hinese]",
    author = "Kung, Shiang-Shiun  and
      Ma, Cin-Hao  and
      Shen, Sin-Fu  and
      Hsiao, Po-Yuan  and
      Tsai, Wei-Ho",
    booktitle = "Proceedings of the 28th Conference on Computational Linguistics and Speech Processing ({ROCLING} 2016)",
    month = oct,
    year = "2016",
    address = "Tainan, Taiwan",
    publisher = "The Association for Computational Linguistics and Chinese Language Processing (ACLCLP)",
    url = "https://www.aclweb.org/anthology/O16-1006",
    pages = "35--48",
}
@inproceedings{bai-etal-2016-ji,
    title = "基於詞語分布均勻度的核心詞彙選擇之研究(A Study on Dispersion Measures for Core Vocabulary Compilation )[In {C}hinese]",
    author = "Bai, Ming-Hong  and
      Wu, Jian-Cheng  and
      Chien, Ying-Ni  and
      Huang, Shu-Ling  and
      Lin, Ching-Lung",
    booktitle = "Proceedings of the 28th Conference on Computational Linguistics and Speech Processing ({ROCLING} 2016)",
    month = oct,
    year = "2016",
    address = "Tainan, Taiwan",
    publisher = "The Association for Computational Linguistics and Chinese Language Processing (ACLCLP)",
    url = "https://www.aclweb.org/anthology/O16-1007",
    pages = "49--51",
}
@inproceedings{chen-chung-2016-shi,
    title = "什麼時候「認真就輸了」？{---}{---}語料庫中「認真」一詞的語意變化(Do We Lose When Being Serious? {---}{C}hange in Meaning of the Word {``}Renzen(認真){''} in Corpora)",
    author = "Chen, Pei-Yi  and
      Chung, Siaw-Fong",
    booktitle = "Proceedings of the 28th Conference on Computational Linguistics and Speech Processing ({ROCLING} 2016)",
    month = oct,
    year = "2016",
    address = "Tainan, Taiwan",
    publisher = "The Association for Computational Linguistics and Chinese Language Processing (ACLCLP)",
    url = "https://www.aclweb.org/anthology/O16-1008",
    pages = "52--81",
}
@inproceedings{huang-etal-2016-crowdsourcing,
    title = "Crowdsourcing Experiment Designs for {C}hinese Word Sense Annotation",
    author = "Huang, Tzu-Yun  and
      Wu, Hsiao-Han  and
      Lee, Chia-Chen  and
      Lee, Shao-Man  and
      Li, Guan-Wei  and
      Hsieh, Shu-Kai",
    booktitle = "Proceedings of the 28th Conference on Computational Linguistics and Speech Processing ({ROCLING} 2016)",
    month = oct,
    year = "2016",
    address = "Tainan, Taiwan",
    publisher = "The Association for Computational Linguistics and Chinese Language Processing (ACLCLP)",
    url = "https://www.aclweb.org/anthology/O16-1009",
    pages = "82--99",
}
@inproceedings{hsieh-ma-2016-ji,
    title = "基於相依詞向量的剖析結果重估與排序(N-best Parse Rescoring Based on Dependency-Based Word Embeddings)",
    author = "Hsieh, Yu-Ming  and
      Ma, Wei-Yun",
    booktitle = "Proceedings of the 28th Conference on Computational Linguistics and Speech Processing ({ROCLING} 2016)",
    month = oct,
    year = "2016",
    address = "Tainan, Taiwan",
    publisher = "The Association for Computational Linguistics and Chinese Language Processing (ACLCLP)",
    url = "https://www.aclweb.org/anthology/O16-1010",
    pages = "100--102",
}
@inproceedings{pu-etal-2016-yi,
    title = "以語言模型評估學習者文句修改前後之流暢度(Using language model to assess the fluency of learners sentences edited by teachers)[In {C}hinese]",
    author = "Pu, Guan-Ying  and
      Chen, Po-Lin  and
      Wu, Shih-Hung",
    booktitle = "Proceedings of the 28th Conference on Computational Linguistics and Speech Processing ({ROCLING} 2016)",
    month = oct,
    year = "2016",
    address = "Tainan, Taiwan",
    publisher = "The Association for Computational Linguistics and Chinese Language Processing (ACLCLP)",
    url = "https://www.aclweb.org/anthology/O16-1011",
    pages = "103--114",
}
@inproceedings{hsieh-etal-2016-yun,
    title = "運用序列到序列生成架構於重寫式自動摘要(Exploiting Sequence-to-Sequence Generation Framework for Automatic Abstractive Summarization)[In {C}hinese]",
    author = "Hsieh, Yu-Lun  and
      Liu, Shih-Hung  and
      Chen, Kuan-Yu  and
      Wang, Hsin-Min  and
      Hsu, Wen-Lian  and
      Chen, Berlin",
    booktitle = "Proceedings of the 28th Conference on Computational Linguistics and Speech Processing ({ROCLING} 2016)",
    month = oct,
    year = "2016",
    address = "Tainan, Taiwan",
    publisher = "The Association for Computational Linguistics and Chinese Language Processing (ACLCLP)",
    url = "https://www.aclweb.org/anthology/O16-1012",
    pages = "115--128",
}
@inproceedings{chen-etal-2016-ji,
    title = "基於字元階層之語音合成用文脈訊息擷取(Character-Level Linguistic Features Extraction for Text-to-Speech System) [In {C}hinese]",
    author = "Chen, Kuan-Hung  and
      Liao, Shu-Han  and
      Liao, Yuan-Fu  and
      Wang, Yih-Ru",
    booktitle = "Proceedings of the 28th Conference on Computational Linguistics and Speech Processing ({ROCLING} 2016)",
    month = oct,
    year = "2016",
    address = "Tainan, Taiwan",
    publisher = "The Association for Computational Linguistics and Chinese Language Processing (ACLCLP)",
    url = "https://www.aclweb.org/anthology/O16-1013",
    pages = "129--130",
}
@inproceedings{kuan-etal-2016-duo,
    title = "多通道之多重音頻串流方法之研究(Multi-channel Source Clustering of Polyphonic Music) [In {C}hinese]",
    author = "Kuan, Chih Yi  and
      Su, Li  and
      Chin, Yu Hao  and
      Wang, Jia-Ching",
    booktitle = "Proceedings of the 28th Conference on Computational Linguistics and Speech Processing ({ROCLING} 2016)",
    month = oct,
    year = "2016",
    address = "Tainan, Taiwan",
    publisher = "The Association for Computational Linguistics and Chinese Language Processing (ACLCLP)",
    url = "https://www.aclweb.org/anthology/O16-1014",
    pages = "131--141",
}
@inproceedings{chen-chen-2016-support,
    title = "Support Super-Vector Machines in Automatic Speech Emotion Recognition",
    author = "Chen, Chia-Ying  and
      Chen, Chia-Ping",
    booktitle = "Proceedings of the 28th Conference on Computational Linguistics and Speech Processing ({ROCLING} 2016)",
    month = oct,
    year = "2016",
    address = "Tainan, Taiwan",
    publisher = "The Association for Computational Linguistics and Chinese Language Processing (ACLCLP)",
    url = "https://www.aclweb.org/anthology/O16-1015",
    pages = "142--152",
}
@inproceedings{liu-etal-2016-speech,
    title = "Speech Intelligibility and the Production of Fricative and Affricate among {M}andarin-speaking Children with Cerebral Palsy",
    author = "Liu, Chin-Ting  and
      Chen, Li-mei  and
      Lin, Yu-Ching  and
      Cheng, Chia-Fang  and
      Chang, Hui-chen",
    booktitle = "Proceedings of the 28th Conference on Computational Linguistics and Speech Processing ({ROCLING} 2016)",
    month = oct,
    year = "2016",
    address = "Tainan, Taiwan",
    publisher = "The Association for Computational Linguistics and Chinese Language Processing (ACLCLP)",
    url = "https://www.aclweb.org/anthology/O16-1016",
    pages = "153--163",
}
@inproceedings{hu-chung-2016-wang,
    title = "網路新興語言{\&}耍{'}之語意辨析：以批踢踢語料庫為本(On the semantic analysis of the verb shua3 in Taiwan {M}andarin: The {PTT} corpus-based study)[In {C}hinese]",
    author = "Hu, Hsueh-ying  and
      Chung, Siaw-Fong",
    booktitle = "Proceedings of the 28th Conference on Computational Linguistics and Speech Processing ({ROCLING} 2016)",
    month = oct,
    year = "2016",
    address = "Tainan, Taiwan",
    publisher = "The Association for Computational Linguistics and Chinese Language Processing (ACLCLP)",
    url = "https://www.aclweb.org/anthology/O16-1017",
    pages = "164--180",
}
@inproceedings{wang-etal-2016-fei,
    title = "非負矩陣分解法於語音調變頻譜強化之研究(A study of enhancing the modulation spectrum of speech signals via nonnegative matrix factorization)[In {C}hinese]",
    author = "Wang, Xu-Xiang  and
      Zheng, Zhi-Hao  and
      Tsao, Yu  and
      Hong, Jhih-Wei",
    booktitle = "Proceedings of the 28th Conference on Computational Linguistics and Speech Processing ({ROCLING} 2016)",
    month = oct,
    year = "2016",
    address = "Tainan, Taiwan",
    publisher = "The Association for Computational Linguistics and Chinese Language Processing (ACLCLP)",
    url = "https://www.aclweb.org/anthology/O16-1018",
    pages = "181--193",
}
@inproceedings{chen-wang-2016-yi,
    title = "以多重表示選擇文章分類的樣本(Using Multiple Representations to Select Instances for Text Classification)[In {C}hinese]",
    author = "Chen, Yao-Hui  and
      Wang, Jhih-Wei",
    booktitle = "Proceedings of the 28th Conference on Computational Linguistics and Speech Processing ({ROCLING} 2016)",
    month = oct,
    year = "2016",
    address = "Tainan, Taiwan",
    publisher = "The Association for Computational Linguistics and Chinese Language Processing (ACLCLP)",
    url = "https://www.aclweb.org/anthology/O16-1019",
    pages = "194--203",
}
@inproceedings{tran-phan-2016-computing,
    title = "Computing Sentiment Scores of Verb Phrases for {V}ietnamese",
    author = "Tran, Thien Khai  and
      Phan, Tuoi Thi",
    booktitle = "Proceedings of the 28th Conference on Computational Linguistics and Speech Processing ({ROCLING} 2016)",
    month = oct,
    year = "2016",
    address = "Tainan, Taiwan",
    publisher = "The Association for Computational Linguistics and Chinese Language Processing (ACLCLP)",
    url = "https://www.aclweb.org/anthology/O16-1020",
    pages = "204--213",
}
@inproceedings{rysova-etal-2016-automatic,
    title = "Automatic evaluation of surface coherence in {L}2 texts in {C}zech",
    author = "Rysov{\'a}, Kate{\v{r}}ina  and
      Rysov{\'a}, Magdal{\'e}na  and
      M{\'\i}rovsk{\'y}, Ji{\v{r}}{\'\i}",
    booktitle = "Proceedings of the 28th Conference on Computational Linguistics and Speech Processing ({ROCLING} 2016)",
    month = oct,
    year = "2016",
    address = "Tainan, Taiwan",
    publisher = "The Association for Computational Linguistics and Chinese Language Processing (ACLCLP)",
    url = "https://www.aclweb.org/anthology/O16-1021",
    pages = "214--228",
}
@inproceedings{lin-chang-2016-facebook,
    title = "{F}acebook 活動事件擷取系統({F}acebook Activity Event Extraction System)[In {C}hinese]",
    author = "Lin, Yuan-Hao  and
      Chang, Chia-Hui",
    booktitle = "Proceedings of the 28th Conference on Computational Linguistics and Speech Processing ({ROCLING} 2016)",
    month = oct,
    year = "2016",
    address = "Tainan, Taiwan",
    publisher = "The Association for Computational Linguistics and Chinese Language Processing (ACLCLP)",
    url = "https://www.aclweb.org/anthology/O16-1022",
    pages = "229--243",
}
@inproceedings{wu-chen-2016-biao,
    title = "標記對於類神經語音情緒辨識系統辨識效果之影響(Effects of Label in Neural Speech Emotion Recognition System)[In {C}hinese]",
    author = "Wu, Tung-Han  and
      Chen, Chia-Ping",
    booktitle = "Proceedings of the 28th Conference on Computational Linguistics and Speech Processing ({ROCLING} 2016)",
    month = oct,
    year = "2016",
    address = "Tainan, Taiwan",
    publisher = "The Association for Computational Linguistics and Chinese Language Processing (ACLCLP)",
    url = "https://www.aclweb.org/anthology/O16-1023",
    pages = "244--254",
}
@inproceedings{tseng-etal-2016-ji,
    title = "基於深層類神經網路及表示學習技術之文件可讀性分類(Classification of Text Readability Based on Deep Neural Network and Representation Learning Techniques)[In {C}hinese]",
    author = "Tseng, Hou-Chiang  and
      Hung, Hsiao-Tsung  and
      Sung, Yao-Ting  and
      Chen, Berlin",
    booktitle = "Proceedings of the 28th Conference on Computational Linguistics and Speech Processing ({ROCLING} 2016)",
    month = oct,
    year = "2016",
    address = "Tainan, Taiwan",
    publisher = "The Association for Computational Linguistics and Chinese Language Processing (ACLCLP)",
    url = "https://www.aclweb.org/anthology/O16-1024",
    pages = "255--270",
}
@inproceedings{hung-etal-2016-ming,
    title = "命名實體識別運用於產品同義詞擴增(Using Named Entity Recognition Increases the Synonym of Products)[In {C}hinese]",
    author = "Hung, Chihli  and
      Huang, Jheng-Hua  and
      Zhong, Rui-Jia  and
      Chen, Liang-Pu  and
      Yang, Ping-Che",
    booktitle = "Proceedings of the 28th Conference on Computational Linguistics and Speech Processing ({ROCLING} 2016)",
    month = oct,
    year = "2016",
    address = "Tainan, Taiwan",
    publisher = "The Association for Computational Linguistics and Chinese Language Processing (ACLCLP)",
    url = "https://www.aclweb.org/anthology/O16-1025",
    pages = "271--283",
}
@inproceedings{magistry-2016-design,
    title = "Design of an Input Method for {T}aiwanese Hokkien using Unsupervized Word Segmentation for Language Modeling",
    author = "Magistry, Pierre",
    booktitle = "Proceedings of the 28th Conference on Computational Linguistics and Speech Processing ({ROCLING} 2016)",
    month = oct,
    year = "2016",
    address = "Tainan, Taiwan",
    publisher = "The Association for Computational Linguistics and Chinese Language Processing (ACLCLP)",
    url = "https://www.aclweb.org/anthology/O16-1026",
    pages = "284--298",
}
@inproceedings{lin-hsieh-2016-sarcasm,
    title = "Sarcasm Detection in {C}hinese Using a Crowdsourced Corpus",
    author = "Lin, Shih-Kai  and
      Hsieh, Shu-Kai",
    booktitle = "Proceedings of the 28th Conference on Computational Linguistics and Speech Processing ({ROCLING} 2016)",
    month = oct,
    year = "2016",
    address = "Tainan, Taiwan",
    publisher = "The Association for Computational Linguistics and Chinese Language Processing (ACLCLP)",
    url = "https://www.aclweb.org/anthology/O16-1027",
    pages = "299--310",
}
@inproceedings{chen-etal-2016-ji-yu,
    title = "基於深層類神經網路之音訊事件偵測系統(Deep Neural Networks for Audio Event Detection)[In {C}hinese]",
    author = "Chen, Jhih-wei  and
      Liu, Chia-Hsin  and
      Liao, Yuan-Fu",
    booktitle = "Proceedings of the 28th Conference on Computational Linguistics and Speech Processing ({ROCLING} 2016)",
    month = oct,
    year = "2016",
    address = "Tainan, Taiwan",
    publisher = "The Association for Computational Linguistics and Chinese Language Processing (ACLCLP)",
    url = "https://www.aclweb.org/anthology/O16-1028",
    pages = "311--324",
}
@inproceedings{hsiao-etal-2016-ji,
    title = "基於增強式深層類神經網路之語言辨認系統(Reinforcement Training for Deep Neural Networks-based Language Recognition)[In {C}hinese]",
    author = "Hsiao, Yen-Wen  and
      Liu, Hung-Jui  and
      Liao, Yuan-Fu",
    booktitle = "Proceedings of the 28th Conference on Computational Linguistics and Speech Processing ({ROCLING} 2016)",
    month = oct,
    year = "2016",
    address = "Tainan, Taiwan",
    publisher = "The Association for Computational Linguistics and Chinese Language Processing (ACLCLP)",
    url = "https://www.aclweb.org/anthology/O16-1029",
    pages = "325--341",
}
@inproceedings{li-etal-2016-zhong,
    title = "中文近義詞的偵測與判別(Detection and Discrimination of {C}hinese Near-synonyms)[In {C}hinese]",
    author = "Li, Shih-Min  and
      Bai, Ming-Hong  and
      Wu, Jian-Cheng  and
      Huang, Shu-Ling  and
      Lin, Ching-Lung",
    booktitle = "Proceedings of the 28th Conference on Computational Linguistics and Speech Processing ({ROCLING} 2016)",
    month = oct,
    year = "2016",
    address = "Tainan, Taiwan",
    publisher = "The Association for Computational Linguistics and Chinese Language Processing (ACLCLP)",
    url = "https://www.aclweb.org/anthology/O16-1030",
    pages = "342--351",
}
@inproceedings{miao-etal-2016-gou,
    title = "構建一個中文國小數學文字問題語料庫(Building a Corpus for Developing the {C}hinese Elementary School Math Word Problem Solver)[In {C}hinese]",
    author = "Miao, Shen-Yun  and
      Lin, Su-Chu  and
      Ma, Wei-Yun  and
      Su, Keh-Yih",
    booktitle = "Proceedings of the 28th Conference on Computational Linguistics and Speech Processing ({ROCLING} 2016)",
    month = oct,
    year = "2016",
    address = "Tainan, Taiwan",
    publisher = "The Association for Computational Linguistics and Chinese Language Processing (ACLCLP)",
    url = "https://www.aclweb.org/anthology/O16-1031",
    pages = "352--371",
}
@inproceedings{huang-etal-2016-ji,
    title = "基於深層遞迴類神經網路之多通道電視回聲消除系統(Multi-Channel Television Echo Cancellation based on Deep Recurrent Neural Networks)[In {C}hinese]",
    author = "Huang, Hung  and
      Hung, Wei-Jung  and
      Liao, Yuan-Fu",
    booktitle = "Proceedings of the 28th Conference on Computational Linguistics and Speech Processing ({ROCLING} 2016)",
    month = oct,
    year = "2016",
    address = "Tainan, Taiwan",
    publisher = "The Association for Computational Linguistics and Chinese Language Processing (ACLCLP)",
    url = "https://www.aclweb.org/anthology/O16-1032",
    pages = "372--386",
}
@inproceedings{sun-lee-2016-ji,
    title = "基於多模態主動式學習法進行需備標記樣本之挑選用於候用校長評鑑之自動化評分系統建置(A Multimodal Active Learning Approach toward Identifying Samples to Label during the Development of Automatic Oral Presentation Assessment System for Pre-service Principals Certification Program)[In {C}hinese]",
    author = "Sun, Hung-Ching  and
      Lee, Chi-Chun",
    booktitle = "Proceedings of the 28th Conference on Computational Linguistics and Speech Processing ({ROCLING} 2016)",
    month = oct,
    year = "2016",
    address = "Tainan, Taiwan",
    publisher = "The Association for Computational Linguistics and Chinese Language Processing (ACLCLP)",
    url = "https://www.aclweb.org/anthology/O16-1033",
    pages = "387--401",
}
@inproceedings{lin-etal-2016-generation,
    title = "Generation of Conceptual-Level Text Cloud with Graph Diffusion",
    author = "Lin, Ying-Chun  and
      Yang, Po-An  and
      Lee, Yen-Kuan  and
      Chuang, Kun-Ta",
    booktitle = "Proceedings of the 28th Conference on Computational Linguistics and Speech Processing ({ROCLING} 2016)",
    month = oct,
    year = "2016",
    address = "Tainan, Taiwan",
    publisher = "The Association for Computational Linguistics and Chinese Language Processing (ACLCLP)",
    url = "https://www.aclweb.org/anthology/O16-1034",
    pages = "402--411",
}
@proceedings{rocling-ijclclp-2016-international,
    title = "International Journal of Computational Linguistics {\&} {C}hinese Language Processing, Volume 21, Number 1, June 2016",
    author = "Tseng, Yuen-Hsien  and
      Chen, Kuang-Hua",
    month = jun,
    year = "2016",
    url = "https://www.aclweb.org/anthology/O16-2000",
}
@inproceedings{chen-etal-2016-segmentation,
    title = "A Segmentation Matrix Method for {C}hinese Segmentation Ambiguity Analysis",
    author = "Chen, Yanping  and
      Zheng, Qinghua  and
      Tian, Feng  and
      Zheng, Deli",
    booktitle = "International Journal of Computational Linguistics {\&} {C}hinese Language Processing, Volume 21, Number 1, June 2016",
    month = jun,
    year = "2016",
    url = "https://www.aclweb.org/anthology/O16-2001",
}
@inproceedings{chang-etal-2016-linguistic,
    title = "Linguistic Template Extraction for Recognizing Reader-Emotion",
    author = "Chang, Yung-Chun  and
      Chu, Chun-Han  and
      Chen, Chien Chin  and
      Hsu, Wen-Lian",
    booktitle = "International Journal of Computational Linguistics {\&} {C}hinese Language Processing, Volume 21, Number 1, June 2016",
    month = jun,
    year = "2016",
    url = "https://www.aclweb.org/anthology/O16-2002",
}
@inproceedings{huang-etal-2016-enriching,
    title = "Enriching Cold Start Personalized Language Model Using Social Network Information",
    author = "Huang, Yu-Yang  and
      Yan, Rui  and
      Kuo, Tsung-Ting  and
      Lin, Shou-De",
    booktitle = "International Journal of Computational Linguistics {\&} {C}hinese Language Processing, Volume 21, Number 1, June 2016",
    month = jun,
    year = "2016",
    url = "https://www.aclweb.org/anthology/O16-2003",
}
@inproceedings{wang-lu-2016-identifying,
    title = "Identifying the Names of Complex Search Tasks with Task-Related Entities",
    author = "Wang, Ting-Xuan  and
      Lu, Wen-Hsiang",
    booktitle = "International Journal of Computational Linguistics {\&} {C}hinese Language Processing, Volume 21, Number 1, June 2016",
    month = jun,
    year = "2016",
    url = "https://www.aclweb.org/anthology/O16-2004",
}
@proceedings{rocling-ijclclp-2016-international-journal,
    title = "International Journal of Computational Linguistics {\&} {C}hinese Language Processing, Volume 21, Number 2, {D}ecember 2016",
    author = "Tseng, Yuen-Hsien  and
      Chien, Jen-Tzung",
    month = dec,
    year = "2016",
    url = "https://www.aclweb.org/anthology/O16-3000",
}
@inproceedings{bai-etal-2016-ji-yu,
    title = "基於詞語分布均勻度的核心詞彙選擇 (A Study on Dispersion Measures for Core Vocabulary Compilation) [In {C}hinese]",
    author = "Bai, Ming-Hong  and
      Wu, Jian-Cheng  and
      Chien, Ying-Ni  and
      Huang, Shu-Ling  and
      Lin, Ching-Lung",
    booktitle = "International Journal of Computational Linguistics {\&} {C}hinese Language Processing, Volume 21, Number 2, {D}ecember 2016",
    month = dec,
    year = "2016",
    url = "https://www.aclweb.org/anthology/O16-3001",
}
@inproceedings{hsieh-ma-2016-n,
    title = "N-best Rescoring for Parsing Based on Dependency-Based Word Embeddings",
    author = "Hsieh, Yu-Ming  and
      Ma, Wei-Yun",
    booktitle = "International Journal of Computational Linguistics {\&} {C}hinese Language Processing, Volume 21, Number 2, {D}ecember 2016",
    month = dec,
    year = "2016",
    url = "https://www.aclweb.org/anthology/O16-3002",
}
@inproceedings{yan-etal-2016-shi-yong,
    title = "使用字典學習法於強健性語音辨識 (The Use of Dictionary Learning Approach for Robustness Speech Recognition) [In {C}hinese]",
    author = "Yan, Bi-Cheng  and
      Shih, Chin-Hong  and
      Liu, Shih-Hung  and
      Chen, Berlin",
    booktitle = "International Journal of Computational Linguistics {\&} {C}hinese Language Processing, Volume 21, Number 2, {D}ecember 2016",
    month = dec,
    year = "2016",
    url = "https://www.aclweb.org/anthology/O16-3003",
}
@inproceedings{hsu-etal-2016-ping-gu,
    title = "評估尺度相關最佳化方法於華語錯誤發音檢測之研究 (Evaluation Metric-related Optimization Methods for {M}andarin Mispronunciation Detection) [In {C}hinese]",
    author = "Hsu, Yao-Chi  and
      Yang, Ming-Han  and
      Hung, Hsiao-Tsung  and
      Lin, Yi-Ju  and
      Chen, Kuan-Yu  and
      Chen, Berlin",
    booktitle = "International Journal of Computational Linguistics {\&} {C}hinese Language Processing, Volume 21, Number 2, {D}ecember 2016",
    month = dec,
    year = "2016",
    url = "https://www.aclweb.org/anthology/O16-3004",
}
@inproceedings{chen-etal-2016-ji-yu-zi,
    title = "基於字元階層之語音合成用文脈訊息擷取 (Character-Level Linguistic Features Extraction for Text-to-Speech System) [In {C}hinese]",
    author = "Chen, Kuan-Hung  and
      Liao, Shu-Han  and
      Liao, Yuan-Fu  and
      Wang, Yih-Ru",
    booktitle = "International Journal of Computational Linguistics {\&} {C}hinese Language Processing, Volume 21, Number 2, {D}ecember 2016",
    month = dec,
    year = "2016",
    url = "https://www.aclweb.org/anthology/O16-3005",
}
@inproceedings{yang-etal-2016-rong-duo,
    title = "融合多任務學習類神經網路聲學模型訓練於會議語音辨識之研究 (Leveraging Multi-Task Learning with Neural Network Based Acoustic Modeling for Improved Meeting Speech Recognition) [In {C}hinese]",
    author = "Yang, Ming-Han  and
      Hsu, Yao-Chi  and
      Hung, Hsiao-Tsung  and
      Chen, Ying-Wen  and
      Chen, Kuan-Yu  and
      Chen, Berlin",
    booktitle = "International Journal of Computational Linguistics {\&} {C}hinese Language Processing, Volume 21, Number 2, {D}ecember 2016",
    month = dec,
    year = "2016",
    url = "https://www.aclweb.org/anthology/O16-3006",
}
@article{cl-1999-linguistics,
    title = "Computational Linguistics, Volume 25, Number 1, March 1999",
    journal = "Computational Linguistics",
    volume = "25",
    number = "1",
    year = "1999",
    url = "https://www.aclweb.org/anthology/J99-1000",
}
@article{carberry-lambert-1999-process,
    title = "A Process Model for Recognizing Communicative Acts and Modeling Negotiation Subdialogues",
    author = "Carberry, Sandra  and
      Lambert, Lynn",
    journal = "Computational Linguistics",
    volume = "25",
    number = "1",
    year = "1999",
    url = "https://www.aclweb.org/anthology/J99-1001",
    pages = "1--53",
}
@article{lascarides-copestake-1999-default,
    title = "Default Representation in Constraint-based Frameworks",
    author = "Lascarides, Alex  and
      Copestake, Ann",
    journal = "Computational Linguistics",
    volume = "25",
    number = "1",
    year = "1999",
    url = "https://www.aclweb.org/anthology/J99-1002",
    pages = "55--105",
}
@article{melamed-1999-bitext,
    title = "Bitext Maps and Alignment via Pattern Recognition",
    author = "Melamed, I. Dan",
    journal = "Computational Linguistics",
    volume = "25",
    number = "1",
    year = "1999",
    url = "https://www.aclweb.org/anthology/J99-1003",
    pages = "107--130",
}
@article{chi-1999-statistical,
    title = "Statistical Properties of Probabilistic Context-Free Grammars",
    author = "Chi, Zhiyi",
    journal = "Computational Linguistics",
    volume = "25",
    number = "1",
    year = "1999",
    url = "https://www.aclweb.org/anthology/J99-1004",
    pages = "131--160",
}
@article{akman-1999-book,
    title = "Book Reviews: Survey of the State of the Art in Human Language Technology",
    author = "Akman, Varol",
    journal = "Computational Linguistics",
    volume = "25",
    number = "1",
    year = "1999",
    url = "https://www.aclweb.org/anthology/J99-1005",
}
@article{biber-1999-book,
    title = "Book Reviews: Exploring Textual Data",
    author = "Biber, Douglas",
    journal = "Computational Linguistics",
    volume = "25",
    number = "1",
    year = "1999",
    url = "https://www.aclweb.org/anthology/J99-1006",
}
@article{tiedemann-1999-book,
    title = "Book Reviews: Linguistic Databases",
    author = {Tiedemann, J{\"o}rg},
    journal = "Computational Linguistics",
    volume = "25",
    number = "1",
    year = "1999",
    url = "https://www.aclweb.org/anthology/J99-1007",
}
@article{nn-1999-briefly,
    title = "Briefly Noted",
    journal = "Computational Linguistics",
    volume = "25",
    number = "1",
    year = "1999",
    url = "https://www.aclweb.org/anthology/J99-1008",
}
@article{nn-1999-erratum,
    title = "Erratum",
    journal = "Computational Linguistics",
    volume = "25",
    number = "1",
    year = "1999",
    url = "https://www.aclweb.org/anthology/J99-1009",
}
@article{nn-1999-advertisements,
    title = "Advertisements",
    journal = "Computational Linguistics",
    volume = "25",
    number = "1",
    year = "1999",
    url = "https://www.aclweb.org/anthology/J99-1010",
}
@article{cl-1999-linguistics-25,
    title = "Computational Linguistics, Volume 25, Number 2, June 1999",
    journal = "Computational Linguistics",
    volume = "25",
    number = "2",
    year = "1999",
    url = "https://www.aclweb.org/anthology/J99-2000",
}
@article{suri-etal-1999-methodology,
    title = "A Methodology for Extending Focusing Frameworks",
    author = "Suri, Linda Z.  and
      McCoy, Kathleen F.  and
      DeCristofaro, Jonathan D.",
    journal = "Computational Linguistics",
    volume = "25",
    number = "2",
    year = "1999",
    url = "https://www.aclweb.org/anthology/J99-2001",
    pages = "173--194",
}
@article{bruce-wiebe-1999-decomposable,
    title = "Decomposable Modeling in Natural Language Processing",
    author = "Bruce, Rebecca  and
      Wiebe, Janyce",
    journal = "Computational Linguistics",
    volume = "25",
    number = "2",
    year = "1999",
    url = "https://www.aclweb.org/anthology/J99-2002",
    pages = "195--207",
}
@article{abrusci-etal-1999-tree,
    title = "Tree Adjoining Grammars in a Fragment of the Lambek Calculus",
    author = "Abrusci, V. Michele  and
      Fouquer{\'e}, Christophe  and
      Vauzeilles, Jacqueline",
    journal = "Computational Linguistics",
    volume = "25",
    number = "2",
    year = "1999",
    url = "https://www.aclweb.org/anthology/J99-2003",
    pages = "209--236",
}
@article{bangalore-joshi-1999-supertagging,
    title = "{S}upertagging: An Approach to Almost Parsing",
    author = "Bangalore, Srinivas  and
      Joshi, Aravind K.",
    journal = "Computational Linguistics",
    volume = "25",
    number = "2",
    year = "1999",
    url = "https://www.aclweb.org/anthology/J99-2004",
    pages = "237--265",
}
@article{somers-1999-aligning,
    title = "Aligning Phonetic Segments for Children{'}s Articulation Assessment",
    author = "Somers, Harold",
    journal = "Computational Linguistics",
    volume = "25",
    number = "2",
    year = "1999",
    url = "https://www.aclweb.org/anthology/J99-2005",
    pages = "267--275",
}
@article{wedekind-1999-semantic,
    title = "Semantic-driven Generation with {LFG}- and {PATR}-style Grammars",
    author = {Wedekind, J{\"u}rgen},
    journal = "Computational Linguistics",
    volume = "25",
    number = "2",
    year = "1999",
    url = "https://www.aclweb.org/anthology/J99-2006",
    pages = "277--281",
}
@article{li-abe-1999-learning,
    title = "Learning Dependencies between Case Frame Slots",
    author = "Li, Hang  and
      Abe, Naoki",
    journal = "Computational Linguistics",
    volume = "25",
    number = "2",
    year = "1999",
    url = "https://www.aclweb.org/anthology/J99-2007",
    pages = "283--291",
}
@article{lin-1999-book,
    title = "Book Reviews: {W}ord{N}et: An Electronic Lexical Database",
    author = "Lin, Dekang",
    journal = "Computational Linguistics",
    volume = "25",
    number = "2",
    year = "1999",
    url = "https://www.aclweb.org/anthology/J99-2008",
}
@article{neufeld-1999-book,
    title = "Book Reviews: Statistical Methods for Speech Recognition",
    author = "Neufeld, Eric",
    journal = "Computational Linguistics",
    volume = "25",
    number = "2",
    year = "1999",
    url = "https://www.aclweb.org/anthology/J99-2009",
}
@article{ooi-1999-book,
    title = "Book Reviews: An Introduction to Corpus Linguistics",
    author = "Ooi, Vincent B.Y.",
    journal = "Computational Linguistics",
    volume = "25",
    number = "2",
    year = "1999",
    url = "https://www.aclweb.org/anthology/J99-2010",
}
@article{lessard-1999-book,
    title = "Book Reviews: Learner {E}nglish on Computer",
    author = "Lessard, Greg",
    journal = "Computational Linguistics",
    volume = "25",
    number = "2",
    year = "1999",
    url = "https://www.aclweb.org/anthology/J99-2011",
}
@article{nn-1999-briefly-noted,
    title = "Briefly Noted",
    journal = "Computational Linguistics",
    volume = "25",
    number = "2",
    year = "1999",
    url = "https://www.aclweb.org/anthology/J99-2012",
}
@article{nn-1999-publications,
    title = "Publications Received",
    journal = "Computational Linguistics",
    volume = "25",
    number = "2",
    year = "1999",
    url = "https://www.aclweb.org/anthology/J99-2013",
}
@article{nn-1999-advertisements-2,
    title = "Advertisements",
    journal = "Computational Linguistics",
    volume = "25",
    number = "2",
    year = "1999",
    url = "https://www.aclweb.org/anthology/J99-2014",
}
@article{cl-1999-linguistics-25-number,
    title = "Computational Linguistics, Volume 25, Number 3, September 1999",
    journal = "Computational Linguistics",
    volume = "25",
    number = "3",
    year = "1999",
    url = "https://www.aclweb.org/anthology/J99-3000",
}
@article{strube-hahn-1999-functional,
    title = "Functional Centering {--} Grounding Referential Coherence on Information Structure",
    author = "Strube, Michael  and
      Hahn, Udo",
    journal = "Computational Linguistics",
    volume = "25",
    number = "3",
    year = "1999",
    url = "https://www.aclweb.org/anthology/J99-3001",
    pages = "309--344",
}
@article{nederhof-1999-computational,
    title = "The Computational Complexity of the Correct-Prefix Property for {TAG}s",
    author = "Nederhof, Mark-Jan",
    journal = "Computational Linguistics",
    volume = "25",
    number = "3",
    year = "1999",
    url = "https://www.aclweb.org/anthology/J99-3002",
    pages = "345--360",
}
@article{chu-carroll-carpenter-1999-vector,
    title = "Vector-based Natural Language Call Routing",
    author = "Chu-Carroll, Jennifer  and
      Carpenter, Bob",
    journal = "Computational Linguistics",
    volume = "25",
    number = "3",
    year = "1999",
    url = "https://www.aclweb.org/anthology/J99-3003",
    pages = "361--388",
}
@article{green-carberry-1999-interpreting,
    title = "Interpreting and Generating Indirect Answers",
    author = "Green, Nancy  and
      Carberry, Sandra",
    journal = "Computational Linguistics",
    volume = "25",
    number = "3",
    year = "1999",
    url = "https://www.aclweb.org/anthology/J99-3004",
    pages = "389--435",
}
@article{schutze-1999-book,
    title = "Book Reviews: Ambiguity Resolution in Language Learning: Computational and Cognitive Models",
    author = {Sch{\"u}tze, Hinrich},
    journal = "Computational Linguistics",
    volume = "25",
    number = "3",
    year = "1999",
    url = "https://www.aclweb.org/anthology/J99-3005",
}
@article{collins-1999-book,
    title = "Book Reviews: Beyond Grammar: An Experience-based Theory of Language",
    author = "Collins, Michael",
    journal = "Computational Linguistics",
    volume = "25",
    number = "3",
    year = "1999",
    url = "https://www.aclweb.org/anthology/J99-3006",
}
@article{pulman-1999-book,
    title = "Book Reviews: Type-Logical Semantics",
    author = "Pulman, Stephen",
    journal = "Computational Linguistics",
    volume = "25",
    number = "3",
    year = "1999",
    url = "https://www.aclweb.org/anthology/J99-3007",
}
@article{thielen-1999-book,
    title = "Book Reviews: Turning a Bilingual Dictionary into a Lexical-Semantic Database",
    author = "Thielen, Christine",
    journal = "Computational Linguistics",
    volume = "25",
    number = "3",
    year = "1999",
    url = "https://www.aclweb.org/anthology/J99-3008",
}
@article{ferrari-1999-book,
    title = "Book Reviews: Processing Metonymy and Metaphor",
    author = "Ferrari, St{\'e}phane",
    journal = "Computational Linguistics",
    volume = "25",
    number = "3",
    year = "1999",
    url = "https://www.aclweb.org/anthology/J99-3009",
}
@article{nn-1999-briefly-noted-2,
    title = "Briefly Noted",
    journal = "Computational Linguistics",
    volume = "25",
    number = "3",
    year = "1999",
    url = "https://www.aclweb.org/anthology/J99-3010",
}
@article{sampson-1999-letter,
    title = "Letter to the Editor: Grammatical Depth: A Rejoinder",
    author = "Sampson, Geoffrey",
    journal = "Computational Linguistics",
    volume = "25",
    number = "3",
    year = "1999",
    url = "https://www.aclweb.org/anthology/J99-3011",
}
@article{nn-1999-advertisements-3,
    title = "Advertisements",
    journal = "Computational Linguistics",
    volume = "25",
    number = "3",
    year = "1999",
    url = "https://www.aclweb.org/anthology/J99-3012",
}
@article{cl-1999-linguistics-25-number-4,
    title = "Computational Linguistics, Volume 25, Number 4, {D}ecember 1999",
    journal = "Computational Linguistics",
    volume = "25",
    number = "4",
    year = "1999",
    url = "https://www.aclweb.org/anthology/J99-4000",
}
@article{ritchie-1999-completeness,
    title = "Completeness conditions for mixed strategy bidirectional parsing",
    author = "Ritchie, Graeme",
    journal = "Computational Linguistics",
    volume = "25",
    number = "4",
    year = "1999",
    url = "https://www.aclweb.org/anthology/J99-4001",
    pages = "457--486",
}
@article{briscoe-copestake-1999-lexical,
    title = "Lexical rules in constraint based grammars",
    author = "Briscoe, Ted  and
      Copestake, Ann",
    journal = "Computational Linguistics",
    volume = "25",
    number = "4",
    year = "1999",
    url = "https://www.aclweb.org/anthology/J99-4002",
    pages = "487--526",
}
@article{heeman-allen-1999-speech,
    title = "Speech repains, intonational phrases, and discourse markers: modeling speakers{'} utterances in spoken dialogue",
    author = "Heeman, Peter A.  and
      Allen, James F.",
    journal = "Computational Linguistics",
    volume = "25",
    number = "4",
    year = "1999",
    url = "https://www.aclweb.org/anthology/J99-4003",
    pages = "527--572",
}
@article{goodman-1999-semiring,
    title = "Semiring Parsing",
    author = "Goodman, Joshua",
    journal = "Computational Linguistics",
    volume = "25",
    number = "4",
    year = "1999",
    url = "https://www.aclweb.org/anthology/J99-4004",
    pages = "573--606",
}
@article{knight-1999-decoding,
    title = "Decoding complexity in word-replacement translation models",
    author = "Knight, Kevin",
    journal = "Computational Linguistics",
    volume = "25",
    number = "4",
    year = "1999",
    url = "https://www.aclweb.org/anthology/J99-4005",
    pages = "607--615",
}
@article{grosz-gordon-1999-conceptions,
    title = "Conceptions of limited attention and discourse focus",
    author = "Grosz, Barbara J.  and
      Gordon, Peter C.",
    journal = "Computational Linguistics",
    volume = "25",
    number = "4",
    year = "1999",
    url = "https://www.aclweb.org/anthology/J99-4006",
    pages = "617--624",
}
@article{mitkov-1999-book,
    title = "Book Reviews: Centering Theory in Discourse",
    author = "Mitkov, Ruslan",
    journal = "Computational Linguistics",
    volume = "25",
    number = "4",
    year = "1999",
    url = "https://www.aclweb.org/anthology/J99-4007",
}
@article{hirst-1999-book,
    title = "Book Reviews: {E}uro{W}ord{N}et: A Multilingual Database with Lexical Semantic Networks",
    author = "Hirst, Graeme",
    journal = "Computational Linguistics",
    volume = "25",
    number = "4",
    year = "1999",
    url = "https://www.aclweb.org/anthology/J99-4008",
}
@article{sowa-1999-book,
    title = "Book Reviews: Philosophy in the Flesh: The Embodied Mind and its Challenge to Western Thought",
    author = "Sowa, John F.",
    journal = "Computational Linguistics",
    volume = "25",
    number = "4",
    year = "1999",
    url = "https://www.aclweb.org/anthology/J99-4009",
}
@article{nn-1999-briefly-noted-3,
    title = "Briefly Noted",
    journal = "Computational Linguistics",
    volume = "25",
    number = "4",
    year = "1999",
    url = "https://www.aclweb.org/anthology/J99-4010",
}
@article{nn-1999-publications-received,
    title = "Publications Received",
    journal = "Computational Linguistics",
    volume = "25",
    number = "4",
    year = "1999",
    url = "https://www.aclweb.org/anthology/J99-4011",
}
@article{cole-1999-letter,
    title = "Letter to the Editor: Language Technology for Beginners",
    author = "Cole, Ronald A.",
    journal = "Computational Linguistics",
    volume = "25",
    number = "4",
    year = "1999",
    url = "https://www.aclweb.org/anthology/J99-4012",
}
@article{nn-1999-author,
    title = "Author Index: Volume 25",
    journal = "Computational Linguistics",
    volume = "25",
    number = "4",
    year = "1999",
    url = "https://www.aclweb.org/anthology/J99-4013",
}
@article{nn-1999-title,
    title = "Title Index: Volume 25",
    journal = "Computational Linguistics",
    volume = "25",
    number = "4",
    year = "1999",
    url = "https://www.aclweb.org/anthology/J99-4014",
}
@article{nn-1999-advertisements-4,
    title = "Advertisements",
    journal = "Computational Linguistics",
    volume = "25",
    number = "4",
    year = "1999",
    url = "https://www.aclweb.org/anthology/J99-4015",
}
@proceedings{eacl-2009-european,
    title = "Proceedings of the 12th Conference of the {E}uropean Chapter of the {ACL} ({EACL} 2009)",
    author = "Lascarides, Alex  and
      Gardent, Claire  and
      Nivre, Joakim",
    month = mar,
    year = "2009",
    address = "Athens, Greece",
    publisher = "Association for Computational Linguistics",
    url = "https://www.aclweb.org/anthology/E09-1000",
}
@inproceedings{copestake-2009-invited,
    title = "\textbf{Invited Talk:} Slacker Semantics: Why Superficiality, Dependency and Avoidance of Commitment can be the Right Way to Go",
    author = "Copestake, Ann",
    booktitle = "Proceedings of the 12th Conference of the {E}uropean Chapter of the {ACL} ({EACL} 2009)",
    month = mar,
    year = "2009",
    address = "Athens, Greece",
    publisher = "Association for Computational Linguistics",
    url = "https://www.aclweb.org/anthology/E09-1001",
    pages = "1--9",
}
@inproceedings{de-jong-2009-invited,
    title = "\textbf{Invited Talk:} {NLP} and the Humanities: The Revival of an Old Liaison",
    author = "de Jong, Franciska",
    booktitle = "Proceedings of the 12th Conference of the {E}uropean Chapter of the {ACL} ({EACL} 2009)",
    month = mar,
    year = "2009",
    address = "Athens, Greece",
    publisher = "Association for Computational Linguistics",
    url = "https://www.aclweb.org/anthology/E09-1002",
    pages = "10--15",
}
@inproceedings{abdul-rauf-schwenk-2009-use,
    title = "On the Use of Comparable Corpora to Improve {SMT} performance",
    author = "Abdul-Rauf, Sadaf  and
      Schwenk, Holger",
    booktitle = "Proceedings of the 12th Conference of the {E}uropean Chapter of the {ACL} ({EACL} 2009)",
    month = mar,
    year = "2009",
    address = "Athens, Greece",
    publisher = "Association for Computational Linguistics",
    url = "https://www.aclweb.org/anthology/E09-1003",
    pages = "16--23",
}
@inproceedings{agarwal-etal-2009-contextual,
    title = "Contextual Phrase-Level Polarity Analysis Using Lexical Affect Scoring and Syntactic {N}-Grams",
    author = "Agarwal, Apoorv  and
      Biadsy, Fadi  and
      McKeown, Kathleen R.",
    booktitle = "Proceedings of the 12th Conference of the {E}uropean Chapter of the {ACL} ({EACL} 2009)",
    month = mar,
    year = "2009",
    address = "Athens, Greece",
    publisher = "Association for Computational Linguistics",
    url = "https://www.aclweb.org/anthology/E09-1004",
    pages = "24--32",
}
@inproceedings{agirre-soroa-2009-personalizing,
    title = "Personalizing {P}age{R}ank for Word Sense Disambiguation",
    author = "Agirre, Eneko  and
      Soroa, Aitor",
    booktitle = "Proceedings of the 12th Conference of the {E}uropean Chapter of the {ACL} ({EACL} 2009)",
    month = mar,
    year = "2009",
    address = "Athens, Greece",
    publisher = "Association for Computational Linguistics",
    url = "https://www.aclweb.org/anthology/E09-1005",
    pages = "33--41",
}
@inproceedings{agirre-lopez-de-lacalle-2009-supervised,
    title = "Supervised Domain Adaption for {WSD}",
    author = "Agirre, Eneko  and
      Lopez de Lacalle, Oier",
    booktitle = "Proceedings of the 12th Conference of the {E}uropean Chapter of the {ACL} ({EACL} 2009)",
    month = mar,
    year = "2009",
    address = "Athens, Greece",
    publisher = "Association for Computational Linguistics",
    url = "https://www.aclweb.org/anthology/E09-1006",
    pages = "42--50",
}
@inproceedings{ah-pine-jacquet-2009-clique,
    title = "Clique-Based Clustering for Improving Named Entity Recognition Systems",
    author = "Ah-Pine, Julien  and
      Jacquet, Guillaume",
    booktitle = "Proceedings of the 12th Conference of the {E}uropean Chapter of the {ACL} ({EACL} 2009)",
    month = mar,
    year = "2009",
    address = "Athens, Greece",
    publisher = "Association for Computational Linguistics",
    url = "https://www.aclweb.org/anthology/E09-1007",
    pages = "51--59",
}
@inproceedings{albrecht-etal-2009-correcting,
    title = "Correcting Automatic Translations through Collaborations between {MT} and Monolingual Target-Language Users",
    author = "Albrecht, Joshua  and
      Hwa, Rebecca  and
      Marai, G. Elisabeta",
    booktitle = "Proceedings of the 12th Conference of the {E}uropean Chapter of the {ACL} ({EACL} 2009)",
    month = mar,
    year = "2009",
    address = "Athens, Greece",
    publisher = "Association for Computational Linguistics",
    url = "https://www.aclweb.org/anthology/E09-1008",
    pages = "60--68",
}
@inproceedings{angelov-2009-incremental,
    title = "Incremental Parsing with Parallel Multiple Context-Free Grammars",
    author = "Angelov, Krasimir",
    booktitle = "Proceedings of the 12th Conference of the {E}uropean Chapter of the {ACL} ({EACL} 2009)",
    month = mar,
    year = "2009",
    address = "Athens, Greece",
    publisher = "Association for Computational Linguistics",
    url = "https://www.aclweb.org/anthology/E09-1009",
    pages = "69--76",
}
@inproceedings{apidianaki-2009-data,
    title = "Data-Driven Semantic Analysis for Multilingual {WSD} and Lexical Selection in Translation",
    author = "Apidianaki, Marianna",
    booktitle = "Proceedings of the 12th Conference of the {E}uropean Chapter of the {ACL} ({EACL} 2009)",
    month = mar,
    year = "2009",
    address = "Athens, Greece",
    publisher = "Association for Computational Linguistics",
    url = "https://www.aclweb.org/anthology/E09-1010",
    pages = "77--85",
}
@inproceedings{badr-etal-2009-syntactic,
    title = "Syntactic Phrase Reordering for {E}nglish-to-{A}rabic Statistical Machine Translation",
    author = "Badr, Ibrahim  and
      Zbib, Rabih  and
      Glass, James",
    booktitle = "Proceedings of the 12th Conference of the {E}uropean Chapter of the {ACL} ({EACL} 2009)",
    month = mar,
    year = "2009",
    address = "Athens, Greece",
    publisher = "Association for Computational Linguistics",
    url = "https://www.aclweb.org/anthology/E09-1011",
    pages = "86--93",
}
@inproceedings{bangalore-stent-2009-incremental,
    title = "Incremental Parsing Models for Dialog Task Structure",
    author = "Bangalore, Srinivas  and
      Stent, Amanda",
    booktitle = "Proceedings of the 12th Conference of the {E}uropean Chapter of the {ACL} ({EACL} 2009)",
    month = mar,
    year = "2009",
    address = "Athens, Greece",
    publisher = "Association for Computational Linguistics",
    url = "https://www.aclweb.org/anthology/E09-1012",
    pages = "94--102",
}
@inproceedings{brody-lapata-2009-bayesian,
    title = "{B}ayesian Word Sense Induction",
    author = "Brody, Samuel  and
      Lapata, Mirella",
    booktitle = "Proceedings of the 12th Conference of the {E}uropean Chapter of the {ACL} ({EACL} 2009)",
    month = mar,
    year = "2009",
    address = "Athens, Greece",
    publisher = "Association for Computational Linguistics",
    url = "https://www.aclweb.org/anthology/E09-1013",
    pages = "103--111",
}
@inproceedings{cahill-forst-2009-human,
    title = "Human Evaluation of a {G}erman Surface Realisation Ranker",
    author = "Cahill, Aoife  and
      Forst, Martin",
    booktitle = "Proceedings of the 12th Conference of the {E}uropean Chapter of the {ACL} ({EACL} 2009)",
    month = mar,
    year = "2009",
    address = "Athens, Greece",
    publisher = "Association for Computational Linguistics",
    url = "https://www.aclweb.org/anthology/E09-1014",
    pages = "112--120",
}
@inproceedings{carlos-etal-2009-large,
    title = "Large-Coverage Root Lexicon Extraction for {H}indi",
    author = "Carlos, Cohan Sujay  and
      Choudhury, Monojit  and
      Dandapat, Sandipan",
    booktitle = "Proceedings of the 12th Conference of the {E}uropean Chapter of the {ACL} ({EACL} 2009)",
    month = mar,
    year = "2009",
    address = "Athens, Greece",
    publisher = "Association for Computational Linguistics",
    url = "https://www.aclweb.org/anthology/E09-1015",
    pages = "121--129",
}
@inproceedings{cartoni-2009-lexical,
    title = "Lexical Morphology in Machine Translation: A Feasibility Study",
    author = "Cartoni, Bruno",
    booktitle = "Proceedings of the 12th Conference of the {E}uropean Chapter of the {ACL} ({EACL} 2009)",
    month = mar,
    year = "2009",
    address = "Athens, Greece",
    publisher = "Association for Computational Linguistics",
    url = "https://www.aclweb.org/anthology/E09-1016",
    pages = "130--138",
}
@inproceedings{chae-nenkova-2009-predicting,
    title = "Predicting the Fluency of Text with Shallow Structural Features: Case Studies of Machine Translation and Human-Written Text",
    author = "Chae, Jieun  and
      Nenkova, Ani",
    booktitle = "Proceedings of the 12th Conference of the {E}uropean Chapter of the {ACL} ({EACL} 2009)",
    month = mar,
    year = "2009",
    address = "Athens, Greece",
    publisher = "Association for Computational Linguistics",
    url = "https://www.aclweb.org/anthology/E09-1017",
    pages = "139--147",
}
@inproceedings{charniak-elsner-2009-em,
    title = "{EM} Works for Pronoun Anaphora Resolution",
    author = "Charniak, Eugene  and
      Elsner, Micha",
    booktitle = "Proceedings of the 12th Conference of the {E}uropean Chapter of the {ACL} ({EACL} 2009)",
    month = mar,
    year = "2009",
    address = "Athens, Greece",
    publisher = "Association for Computational Linguistics",
    url = "https://www.aclweb.org/anthology/E09-1018",
    pages = "148--156",
}
@inproceedings{creutz-etal-2009-web,
    title = "Web Augmentation of Language Models for Continuous Speech Recognition of {SMS} Text Messages",
    author = "Creutz, Mathias  and
      Virpioja, Sami  and
      Kovaleva, Anna",
    booktitle = "Proceedings of the 12th Conference of the {E}uropean Chapter of the {ACL} ({EACL} 2009)",
    month = mar,
    year = "2009",
    address = "Athens, Greece",
    publisher = "Association for Computational Linguistics",
    url = "https://www.aclweb.org/anthology/E09-1019",
    pages = "157--165",
}
@inproceedings{cromieres-kurohashi-2009-alignment,
    title = "An Alignment Algorithm Using Belief Propagation and a Structure-Based Distortion Model",
    author = "Cromi{\`e}res, Fabien  and
      Kurohashi, Sadao",
    booktitle = "Proceedings of the 12th Conference of the {E}uropean Chapter of the {ACL} ({EACL} 2009)",
    month = mar,
    year = "2009",
    address = "Athens, Greece",
    publisher = "Association for Computational Linguistics",
    url = "https://www.aclweb.org/anthology/E09-1020",
    pages = "166--174",
}
@inproceedings{davidov-rappoport-2009-translation,
    title = "Translation and Extension of Concepts Across Languages",
    author = "Davidov, Dmitry  and
      Rappoport, Ari",
    booktitle = "Proceedings of the 12th Conference of the {E}uropean Chapter of the {ACL} ({EACL} 2009)",
    month = mar,
    year = "2009",
    address = "Athens, Greece",
    publisher = "Association for Computational Linguistics",
    url = "https://www.aclweb.org/anthology/E09-1021",
    pages = "175--183",
}
@inproceedings{devault-stone-2009-learning,
    title = "Learning to Interpret Utterances Using Dialogue History",
    author = "DeVault, David  and
      Stone, Matthew",
    booktitle = "Proceedings of the 12th Conference of the {E}uropean Chapter of the {ACL} ({EACL} 2009)",
    month = mar,
    year = "2009",
    address = "Athens, Greece",
    publisher = "Association for Computational Linguistics",
    url = "https://www.aclweb.org/anthology/E09-1022",
    pages = "184--192",
}
@inproceedings{dickinson-2009-correcting,
    title = "Correcting Dependency Annotation Errors",
    author = "Dickinson, Markus",
    booktitle = "Proceedings of the 12th Conference of the {E}uropean Chapter of the {ACL} ({EACL} 2009)",
    month = mar,
    year = "2009",
    address = "Athens, Greece",
    publisher = "Association for Computational Linguistics",
    url = "https://www.aclweb.org/anthology/E09-1023",
    pages = "193--201",
}
@inproceedings{dinarelli-etal-2009-ranking,
    title = "Re-Ranking Models for Spoken Language Understanding",
    author = "Dinarelli, Marco  and
      Moschitti, Alessandro  and
      Riccardi, Giuseppe",
    booktitle = "Proceedings of the 12th Conference of the {E}uropean Chapter of the {ACL} ({EACL} 2009)",
    month = mar,
    year = "2009",
    address = "Athens, Greece",
    publisher = "Association for Computational Linguistics",
    url = "https://www.aclweb.org/anthology/E09-1024",
    pages = "202--210",
}
@inproceedings{dinu-wang-2009-inference,
    title = "Inference Rules and their Application to Recognizing Textual Entailment",
    author = "Dinu, Georgiana  and
      Wang, Rui",
    booktitle = "Proceedings of the 12th Conference of the {E}uropean Chapter of the {ACL} ({EACL} 2009)",
    month = mar,
    year = "2009",
    address = "Athens, Greece",
    publisher = "Association for Computational Linguistics",
    url = "https://www.aclweb.org/anthology/E09-1025",
    pages = "211--219",
}
@inproceedings{furstenau-lapata-2009-semi,
    title = "Semi-Supervised Semantic Role Labeling",
    author = {F{\"u}rstenau, Hagen  and
      Lapata, Mirella},
    booktitle = "Proceedings of the 12th Conference of the {E}uropean Chapter of the {ACL} ({EACL} 2009)",
    month = mar,
    year = "2009",
    address = "Athens, Greece",
    publisher = "Association for Computational Linguistics",
    url = "https://www.aclweb.org/anthology/E09-1026",
    pages = "220--228",
}
@inproceedings{feng-etal-2009-cognitively,
    title = "Cognitively Motivated Features for Readability Assessment",
    author = "Feng, Lijun  and
      Elhadad, No{\'e}mie  and
      Huenerfauth, Matt",
    booktitle = "Proceedings of the 12th Conference of the {E}uropean Chapter of the {ACL} ({EACL} 2009)",
    month = mar,
    year = "2009",
    address = "Athens, Greece",
    publisher = "Association for Computational Linguistics",
    url = "https://www.aclweb.org/anthology/E09-1027",
    pages = "229--237",
}
@inproceedings{feng-bangalore-2009-effects,
    title = "Effects of Word Confusion Networks on Voice Search",
    author = "Feng, Junlan  and
      Bangalore, Srinivas",
    booktitle = "Proceedings of the 12th Conference of the {E}uropean Chapter of the {ACL} ({EACL} 2009)",
    month = mar,
    year = "2009",
    address = "Athens, Greece",
    publisher = "Association for Computational Linguistics",
    url = "https://www.aclweb.org/anthology/E09-1028",
    pages = "238--245",
}
@inproceedings{filippova-etal-2009-company,
    title = "Company-Oriented Extractive Summarization of Financial News",
    author = "Filippova, Katja  and
      Surdeanu, Mihai  and
      Ciaramita, Massimiliano  and
      Zaragoza, Hugo",
    booktitle = "Proceedings of the 12th Conference of the {E}uropean Chapter of the {ACL} ({EACL} 2009)",
    month = mar,
    year = "2009",
    address = "Athens, Greece",
    publisher = "Association for Computational Linguistics",
    url = "https://www.aclweb.org/anthology/E09-1029",
    pages = "246--254",
}
@inproceedings{fitzgerald-etal-2009-reconstructing,
    title = "Reconstructing False Start Errors in Spontaneous Speech Text",
    author = "Fitzgerald, Erin  and
      Hall, Keith  and
      Jelinek, Frederick",
    booktitle = "Proceedings of the 12th Conference of the {E}uropean Chapter of the {ACL} ({EACL} 2009)",
    month = mar,
    year = "2009",
    address = "Athens, Greece",
    publisher = "Association for Computational Linguistics",
    url = "https://www.aclweb.org/anthology/E09-1030",
    pages = "255--263",
}
@inproceedings{forst-fang-2009-tbl,
    title = "{TBL}-Improved Non-Deterministic Segmentation and {POS} Tagging for a {C}hinese Parser",
    author = "Forst, Martin  and
      Fang, Ji",
    booktitle = "Proceedings of the 12th Conference of the {E}uropean Chapter of the {ACL} ({EACL} 2009)",
    month = mar,
    year = "2009",
    address = "Athens, Greece",
    publisher = "Association for Computational Linguistics",
    url = "https://www.aclweb.org/anthology/E09-1031",
    pages = "264--272",
}
@inproceedings{frampton-etal-2009-combining,
    title = "Who is {``}You{''}? Combining Linguistic and Gaze Features to Resolve Second-Person References in Dialogue",
    author = "Frampton, Matthew  and
      Fern{\'a}ndez, Raquel  and
      Ehlen, Patrick  and
      Christoudias, Mario  and
      Darrell, Trevor  and
      Peters, Stanley",
    booktitle = "Proceedings of the 12th Conference of the {E}uropean Chapter of the {ACL} ({EACL} 2009)",
    month = mar,
    year = "2009",
    address = "Athens, Greece",
    publisher = "Association for Computational Linguistics",
    url = "https://www.aclweb.org/anthology/E09-1032",
    pages = "273--281",
}
@inproceedings{fraser-etal-2009-rich,
    title = "Rich Bitext Projection Features for Parse Reranking",
    author = {Fraser, Alexander  and
      Wang, Renjing  and
      Sch{\"u}tze, Hinrich},
    booktitle = "Proceedings of the 12th Conference of the {E}uropean Chapter of the {ACL} ({EACL} 2009)",
    month = mar,
    year = "2009",
    address = "Athens, Greece",
    publisher = "Association for Computational Linguistics",
    url = "https://www.aclweb.org/anthology/E09-1033",
    pages = "282--290",
}
@inproceedings{gomez-rodriguez-etal-2009-parsing,
    title = "Parsing Mildly Non-Projective Dependency Structures",
    author = "G{\'o}mez-Rodr{\'\i}guez, Carlos  and
      Weir, David  and
      Carroll, John",
    booktitle = "Proceedings of the 12th Conference of the {E}uropean Chapter of the {ACL} ({EACL} 2009)",
    month = mar,
    year = "2009",
    address = "Athens, Greece",
    publisher = "Association for Computational Linguistics",
    url = "https://www.aclweb.org/anthology/E09-1034",
    pages = "291--299",
}
@inproceedings{garera-yarowsky-2009-structural,
    title = "Structural, Transitive and Latent Models for Biographic Fact Extraction",
    author = "Garera, Nikesh  and
      Yarowsky, David",
    booktitle = "Proceedings of the 12th Conference of the {E}uropean Chapter of the {ACL} ({EACL} 2009)",
    month = mar,
    year = "2009",
    address = "Athens, Greece",
    publisher = "Association for Computational Linguistics",
    url = "https://www.aclweb.org/anthology/E09-1035",
    pages = "300--308",
}
@inproceedings{gasser-2009-semitic,
    title = "{S}emitic Morphological Analysis and Generation Using Finite State Transducers with Feature Structures",
    author = "Gasser, Michael",
    booktitle = "Proceedings of the 12th Conference of the {E}uropean Chapter of the {ACL} ({EACL} 2009)",
    month = mar,
    year = "2009",
    address = "Athens, Greece",
    publisher = "Association for Computational Linguistics",
    url = "https://www.aclweb.org/anthology/E09-1036",
    pages = "309--317",
}
@inproceedings{gimpel-smith-2009-cube,
    title = "Cube Summing, Approximate Inference with Non-Local Features, and Dynamic Programming without Semirings",
    author = "Gimpel, Kevin  and
      Smith, Noah A.",
    booktitle = "Proceedings of the 12th Conference of the {E}uropean Chapter of the {ACL} ({EACL} 2009)",
    month = mar,
    year = "2009",
    address = "Athens, Greece",
    publisher = "Association for Computational Linguistics",
    url = "https://www.aclweb.org/anthology/E09-1037",
    pages = "318--326",
}
@inproceedings{goldberg-etal-2009-enhancing,
    title = "Enhancing Unlexicalized Parsing Performance Using a Wide Coverage Lexicon, Fuzzy Tag-Set Mapping, and {EM}-{HMM}-Based Lexical Probabilities",
    author = "Goldberg, Yoav  and
      Tsarfaty, Reut  and
      Adler, Meni  and
      Elhadad, Michael",
    booktitle = "Proceedings of the 12th Conference of the {E}uropean Chapter of the {ACL} ({EACL} 2009)",
    month = mar,
    year = "2009",
    address = "Athens, Greece",
    publisher = "Association for Computational Linguistics",
    url = "https://www.aclweb.org/anthology/E09-1038",
    pages = "327--335",
}
@inproceedings{goldstein-stewart-etal-2009-person,
    title = "Person Identification from Text and Speech Genre Samples",
    author = "Goldstein-Stewart, Jade  and
      Winder, Ransom  and
      Sabin, Roberta",
    booktitle = "Proceedings of the 12th Conference of the {E}uropean Chapter of the {ACL} ({EACL} 2009)",
    month = mar,
    year = "2009",
    address = "Athens, Greece",
    publisher = "Association for Computational Linguistics",
    url = "https://www.aclweb.org/anthology/E09-1039",
    pages = "336--344",
}
@inproceedings{hamon-etal-2009-end,
    title = "End-to-End Evaluation in Simultaneous Translation",
    author = {Hamon, Olivier  and
      F{\"u}gen, Christian  and
      Mostefa, Djamel  and
      Arranz, Victoria  and
      Kolss, Muntsin  and
      Waibel, Alex  and
      Choukri, Khalid},
    booktitle = "Proceedings of the 12th Conference of the {E}uropean Chapter of the {ACL} ({EACL} 2009)",
    month = mar,
    year = "2009",
    address = "Athens, Greece",
    publisher = "Association for Computational Linguistics",
    url = "https://www.aclweb.org/anthology/E09-1040",
    pages = "345--353",
}
@inproceedings{hasan-etal-2009-learning,
    title = "Learning-Based Named Entity Recognition for Morphologically-Rich, Resource-Scarce Languages",
    author = "Hasan, Kazi Saidul  and
      Rahman, Md. Altaf ur  and
      Ng, Vincent",
    booktitle = "Proceedings of the 12th Conference of the {E}uropean Chapter of the {ACL} ({EACL} 2009)",
    month = mar,
    year = "2009",
    address = "Athens, Greece",
    publisher = "Association for Computational Linguistics",
    url = "https://www.aclweb.org/anthology/E09-1041",
    pages = "354--362",
}
@inproceedings{hasan-ng-2009-weakly,
    title = "Weakly Supervised Part-of-Speech Tagging for Morphologically-Rich, Resource-Scarce Languages",
    author = "Hasan, Kazi Saidul  and
      Ng, Vincent",
    booktitle = "Proceedings of the 12th Conference of the {E}uropean Chapter of the {ACL} ({EACL} 2009)",
    month = mar,
    year = "2009",
    address = "Athens, Greece",
    publisher = "Association for Computational Linguistics",
    url = "https://www.aclweb.org/anthology/E09-1042",
    pages = "363--371",
}
@inproceedings{hoang-koehn-2009-improving,
    title = "Improving Mid-Range Re-Ordering Using Templates of Factors",
    author = "Hoang, Hieu  and
      Koehn, Philipp",
    booktitle = "Proceedings of the 12th Conference of the {E}uropean Chapter of the {ACL} ({EACL} 2009)",
    month = mar,
    year = "2009",
    address = "Athens, Greece",
    publisher = "Association for Computational Linguistics",
    url = "https://www.aclweb.org/anthology/E09-1043",
    pages = "372--379",
}
@inproceedings{iglesias-etal-2009-rule,
    title = "Rule Filtering by Pattern for Efficient Hierarchical Translation",
    author = "Iglesias, Gonzalo  and
      de Gispert, Adri{\`a}  and
      Banga, Eduardo R.  and
      Byrne, William",
    booktitle = "Proceedings of the 12th Conference of the {E}uropean Chapter of the {ACL} ({EACL} 2009)",
    month = mar,
    year = "2009",
    address = "Athens, Greece",
    publisher = "Association for Computational Linguistics",
    url = "https://www.aclweb.org/anthology/E09-1044",
    pages = "380--388",
}
@inproceedings{izquierdo-etal-2009-empirical,
    title = "An Empirical Study on Class-Based Word Sense Disambiguation",
    author = "Izquierdo, Rub{\'e}n  and
      Su{\'a}rez, Armando  and
      Rigau, German",
    booktitle = "Proceedings of the 12th Conference of the {E}uropean Chapter of the {ACL} ({EACL} 2009)",
    month = mar,
    year = "2009",
    address = "Athens, Greece",
    publisher = "Association for Computational Linguistics",
    url = "https://www.aclweb.org/anthology/E09-1045",
    pages = "389--397",
}
@inproceedings{jijkoun-hofmann-2009-generating,
    title = "Generating a Non-{E}nglish Subjectivity Lexicon: Relations That Matter",
    author = "Jijkoun, Valentin  and
      Hofmann, Katja",
    booktitle = "Proceedings of the 12th Conference of the {E}uropean Chapter of the {ACL} ({EACL} 2009)",
    month = mar,
    year = "2009",
    address = "Athens, Greece",
    publisher = "Association for Computational Linguistics",
    url = "https://www.aclweb.org/anthology/E09-1046",
    pages = "398--405",
}
@inproceedings{kubler-etal-2009-parsing,
    title = "Parsing Coordinations",
    author = {K{\"u}bler, Sandra  and
      Hinrichs, Erhard  and
      Maier, Wolfgang  and
      Klett, Eva},
    booktitle = "Proceedings of the 12th Conference of the {E}uropean Chapter of the {ACL} ({EACL} 2009)",
    month = mar,
    year = "2009",
    address = "Athens, Greece",
    publisher = "Association for Computational Linguistics",
    url = "https://www.aclweb.org/anthology/E09-1047",
    pages = "406--414",
}
@inproceedings{kastner-monz-2009-automatic,
    title = "Automatic Single-Document Key Fact Extraction from Newswire Articles",
    author = "Kastner, Itamar  and
      Monz, Christof",
    booktitle = "Proceedings of the 12th Conference of the {E}uropean Chapter of the {ACL} ({EACL} 2009)",
    month = mar,
    year = "2009",
    address = "Athens, Greece",
    publisher = "Association for Computational Linguistics",
    url = "https://www.aclweb.org/anthology/E09-1048",
    pages = "415--423",
}
@inproceedings{khalilov-fonollosa-2009-n,
    title = "{N}-Gram-Based Statistical Machine Translation versus Syntax Augmented Machine Translation: Comparison and System Combination",
    author = "Khalilov, Maxim  and
      Fonollosa, Jos{\'e} A. R.",
    booktitle = "Proceedings of the 12th Conference of the {E}uropean Chapter of the {ACL} ({EACL} 2009)",
    month = mar,
    year = "2009",
    address = "Athens, Greece",
    publisher = "Association for Computational Linguistics",
    url = "https://www.aclweb.org/anthology/E09-1049",
    pages = "424--432",
}
@inproceedings{kirschenbaum-wintner-2009-lightly,
    title = "Lightly Supervised Transliteration for Machine Translation",
    author = "Kirschenbaum, Amit  and
      Wintner, Shuly",
    booktitle = "Proceedings of the 12th Conference of the {E}uropean Chapter of the {ACL} ({EACL} 2009)",
    month = mar,
    year = "2009",
    address = "Athens, Greece",
    publisher = "Association for Computational Linguistics",
    url = "https://www.aclweb.org/anthology/E09-1050",
    pages = "433--441",
}
@inproceedings{klenner-ailloud-2009-optimization,
    title = "Optimization in Coreference Resolution is not Needed: A Nearly-Optimal Algorithm with Intensional Constraints",
    author = "Klenner, Manfred  and
      Ailloud, {\'E}tienne",
    booktitle = "Proceedings of the 12th Conference of the {E}uropean Chapter of the {ACL} ({EACL} 2009)",
    month = mar,
    year = "2009",
    address = "Athens, Greece",
    publisher = "Association for Computational Linguistics",
    url = "https://www.aclweb.org/anthology/E09-1051",
    pages = "442--450",
}
@inproceedings{koller-lascarides-2009-logic,
    title = "A Logic of Semantic Representations for Shallow Parsing",
    author = "Koller, Alexander  and
      Lascarides, Alex",
    booktitle = "Proceedings of the 12th Conference of the {E}uropean Chapter of the {ACL} ({EACL} 2009)",
    month = mar,
    year = "2009",
    address = "Athens, Greece",
    publisher = "Association for Computational Linguistics",
    url = "https://www.aclweb.org/anthology/E09-1052",
    pages = "451--459",
}
@inproceedings{koller-kuhlmann-2009-dependency,
    title = "Dependency Trees and the Strong Generative Capacity of {CCG}",
    author = "Koller, Alexander  and
      Kuhlmann, Marco",
    booktitle = "Proceedings of the 12th Conference of the {E}uropean Chapter of the {ACL} ({EACL} 2009)",
    month = mar,
    year = "2009",
    address = "Athens, Greece",
    publisher = "Association for Computational Linguistics",
    url = "https://www.aclweb.org/anthology/E09-1053",
    pages = "460--468",
}
@inproceedings{kopru-yazici-2009-lattice,
    title = "Lattice Parsing to Integrate Speech Recognition and Rule-Based Machine Translation",
    author = {K{\"o}pr{\"u}, Sel{\c{c}}uk  and
      Yaz{\i}c{\i}, Adnan},
    booktitle = "Proceedings of the 12th Conference of the {E}uropean Chapter of the {ACL} ({EACL} 2009)",
    month = mar,
    year = "2009",
    address = "Athens, Greece",
    publisher = "Association for Computational Linguistics",
    url = "https://www.aclweb.org/anthology/E09-1054",
    pages = "469--477",
}
@inproceedings{kuhlmann-satta-2009-treebank,
    title = "Treebank Grammar Techniques for Non-Projective Dependency Parsing",
    author = "Kuhlmann, Marco  and
      Satta, Giorgio",
    booktitle = "Proceedings of the 12th Conference of the {E}uropean Chapter of the {ACL} ({EACL} 2009)",
    month = mar,
    year = "2009",
    address = "Athens, Greece",
    publisher = "Association for Computational Linguistics",
    url = "https://www.aclweb.org/anthology/E09-1055",
    pages = "478--486",
}
@inproceedings{langlais-etal-2009-improvements,
    title = "Improvements in Analogical Learning: Application to Translating Multi-Terms of the Medical Domain",
    author = "Langlais, Philippe  and
      Yvon, Fran{\c{c}}ois  and
      Zweigenbaum, Pierre",
    booktitle = "Proceedings of the 12th Conference of the {E}uropean Chapter of the {ACL} ({EACL} 2009)",
    month = mar,
    year = "2009",
    address = "Athens, Greece",
    publisher = "Association for Computational Linguistics",
    url = "https://www.aclweb.org/anthology/E09-1056",
    pages = "487--495",
}
@inproceedings{lefever-etal-2009-language,
    title = "Language-Independent Bilingual Terminology Extraction from a Multilingual Parallel Corpus",
    author = "Lefever, Els  and
      Macken, Lieve  and
      Hoste, Veronique",
    booktitle = "Proceedings of the 12th Conference of the {E}uropean Chapter of the {ACL} ({EACL} 2009)",
    month = mar,
    year = "2009",
    address = "Athens, Greece",
    publisher = "Association for Computational Linguistics",
    url = "https://www.aclweb.org/anthology/E09-1057",
    pages = "496--504",
}
@inproceedings{lemon-konstas-2009-user,
    title = "User Simulations for Context-Sensitive Speech Recognition in Spoken Dialogue Systems",
    author = "Lemon, Oliver  and
      Konstas, Ioannis",
    booktitle = "Proceedings of the 12th Conference of the {E}uropean Chapter of the {ACL} ({EACL} 2009)",
    month = mar,
    year = "2009",
    address = "Athens, Greece",
    publisher = "Association for Computational Linguistics",
    url = "https://www.aclweb.org/anthology/E09-1058",
    pages = "505--513",
}
@inproceedings{lerman-etal-2009-sentiment,
    title = "Sentiment Summarization: Evaluating and Learning User Preferences",
    author = "Lerman, Kevin  and
      Blair-Goldensohn, Sasha  and
      McDonald, Ryan",
    booktitle = "Proceedings of the 12th Conference of the {E}uropean Chapter of the {ACL} ({EACL} 2009)",
    month = mar,
    year = "2009",
    address = "Athens, Greece",
    publisher = "Association for Computational Linguistics",
    url = "https://www.aclweb.org/anthology/E09-1059",
    pages = "514--522",
}
@inproceedings{loftsson-2009-correcting,
    title = "Correcting a {POS}-Tagged Corpus Using Three Complementary Methods",
    author = "Loftsson, Hrafn",
    booktitle = "Proceedings of the 12th Conference of the {E}uropean Chapter of the {ACL} ({EACL} 2009)",
    month = mar,
    year = "2009",
    address = "Athens, Greece",
    publisher = "Association for Computational Linguistics",
    url = "https://www.aclweb.org/anthology/E09-1060",
    pages = "523--531",
}
@inproceedings{lopez-2009-translation,
    title = "Translation as Weighted Deduction",
    author = "Lopez, Adam",
    booktitle = "Proceedings of the 12th Conference of the {E}uropean Chapter of the {ACL} ({EACL} 2009)",
    month = mar,
    year = "2009",
    address = "Athens, Greece",
    publisher = "Association for Computational Linguistics",
    url = "https://www.aclweb.org/anthology/E09-1061",
    pages = "532--540",
}
@inproceedings{louis-nenkova-2009-performance,
    title = "Performance Confidence Estimation for Automatic Summarization",
    author = "Louis, Annie  and
      Nenkova, Ani",
    booktitle = "Proceedings of the 12th Conference of the {E}uropean Chapter of the {ACL} ({EACL} 2009)",
    month = mar,
    year = "2009",
    address = "Athens, Greece",
    publisher = "Association for Computational Linguistics",
    url = "https://www.aclweb.org/anthology/E09-1062",
    pages = "541--548",
}
@inproceedings{ma-way-2009-bilingually,
    title = "Bilingually Motivated Domain-Adapted Word Segmentation for Statistical Machine Translation",
    author = "Ma, Yanjun  and
      Way, Andy",
    booktitle = "Proceedings of the 12th Conference of the {E}uropean Chapter of the {ACL} ({EACL} 2009)",
    month = mar,
    year = "2009",
    address = "Athens, Greece",
    publisher = "Association for Computational Linguistics",
    url = "https://www.aclweb.org/anthology/E09-1063",
    pages = "549--557",
}
@inproceedings{mirkin-etal-2009-evaluating,
    title = "Evaluating the Inferential Utility of Lexical-Semantic Resources",
    author = "Mirkin, Shachar  and
      Dagan, Ido  and
      Shnarch, Eyal",
    booktitle = "Proceedings of the 12th Conference of the {E}uropean Chapter of the {ACL} ({EACL} 2009)",
    month = mar,
    year = "2009",
    address = "Athens, Greece",
    publisher = "Association for Computational Linguistics",
    url = "https://www.aclweb.org/anthology/E09-1064",
    pages = "558--566",
}
@inproceedings{mohler-mihalcea-2009-text,
    title = "Text-to-Text Semantic Similarity for Automatic Short Answer Grading",
    author = "Mohler, Michael  and
      Mihalcea, Rada",
    booktitle = "Proceedings of the 12th Conference of the {E}uropean Chapter of the {ACL} ({EACL} 2009)",
    month = mar,
    year = "2009",
    address = "Athens, Greece",
    publisher = "Association for Computational Linguistics",
    url = "https://www.aclweb.org/anthology/E09-1065",
    pages = "567--575",
}
@inproceedings{moschitti-2009-syntactic,
    title = "Syntactic and Semantic Kernels for Short Text Pair Categorization",
    author = "Moschitti, Alessandro",
    booktitle = "Proceedings of the 12th Conference of the {E}uropean Chapter of the {ACL} ({EACL} 2009)",
    month = mar,
    year = "2009",
    address = "Athens, Greece",
    publisher = "Association for Computational Linguistics",
    url = "https://www.aclweb.org/anthology/E09-1066",
    pages = "576--584",
}
@inproceedings{mukherjee-etal-2009-discovering,
    title = "Discovering Global Patterns in Linguistic Networks through Spectral Analysis: A Case Study of the Consonant Inventories",
    author = "Mukherjee, Animesh  and
      Choudhury, Monojit  and
      Kannan, Ravi",
    booktitle = "Proceedings of the 12th Conference of the {E}uropean Chapter of the {ACL} ({EACL} 2009)",
    month = mar,
    year = "2009",
    address = "Athens, Greece",
    publisher = "Association for Computational Linguistics",
    url = "https://www.aclweb.org/anthology/E09-1067",
    pages = "585--593",
}
@inproceedings{navigli-2009-using,
    title = "Using Cycles and Quasi-Cycles to Disambiguate Dictionary Glosses",
    author = "Navigli, Roberto",
    booktitle = "Proceedings of the 12th Conference of the {E}uropean Chapter of the {ACL} ({EACL} 2009)",
    month = mar,
    year = "2009",
    address = "Athens, Greece",
    publisher = "Association for Computational Linguistics",
    url = "https://www.aclweb.org/anthology/E09-1068",
    pages = "594--602",
}
@inproceedings{ninomiya-etal-2009-deterministic,
    title = "Deterministic Shift-Reduce Parsing for Unification-Based Grammars by Using Default Unification",
    author = "Ninomiya, Takashi  and
      Matsuzaki, Takuya  and
      Shimizu, Nobuyuki  and
      Nakagawa, Hiroshi",
    booktitle = "Proceedings of the 12th Conference of the {E}uropean Chapter of the {ACL} ({EACL} 2009)",
    month = mar,
    year = "2009",
    address = "Athens, Greece",
    publisher = "Association for Computational Linguistics",
    url = "https://www.aclweb.org/anthology/E09-1069",
    pages = "603--611",
}
@inproceedings{nothman-etal-2009-analysing,
    title = "Analysing {W}ikipedia and Gold-Standard Corpora for {NER} Training",
    author = "Nothman, Joel  and
      Murphy, Tara  and
      Curran, James R.",
    booktitle = "Proceedings of the 12th Conference of the {E}uropean Chapter of the {ACL} ({EACL} 2009)",
    month = mar,
    year = "2009",
    address = "Athens, Greece",
    publisher = "Association for Computational Linguistics",
    url = "https://www.aclweb.org/anthology/E09-1070",
    pages = "612--620",
}
@inproceedings{o-seaghdha-copestake-2009-using,
    title = "Using Lexical and Relational Similarity to Classify Semantic Relations",
    author = "{\'O} S{\'e}aghdha, Diarmuid  and
      Copestake, Ann",
    booktitle = "Proceedings of the 12th Conference of the {E}uropean Chapter of the {ACL} ({EACL} 2009)",
    month = mar,
    year = "2009",
    address = "Athens, Greece",
    publisher = "Association for Computational Linguistics",
    url = "https://www.aclweb.org/anthology/E09-1071",
    pages = "621--629",
}
@inproceedings{ovrelid-2009-empirical,
    title = "Empirical Evaluations of {A}nimacy Annotation",
    author = "{\O}vrelid, Lilja",
    booktitle = "Proceedings of the 12th Conference of the {E}uropean Chapter of the {ACL} ({EACL} 2009)",
    month = mar,
    year = "2009",
    address = "Athens, Greece",
    publisher = "Association for Computational Linguistics",
    url = "https://www.aclweb.org/anthology/E09-1072",
    pages = "630--638",
}
@inproceedings{pasca-2009-outclassing,
    title = "Outclassing {W}ikipedia in Open-Domain Information Extraction: Weakly-Supervised Acquisition of Attributes over Conceptual Hierarchies",
    author = "Pa{\c{s}}ca, Marius",
    booktitle = "Proceedings of the 12th Conference of the {E}uropean Chapter of the {ACL} ({EACL} 2009)",
    month = mar,
    year = "2009",
    address = "Athens, Greece",
    publisher = "Association for Computational Linguistics",
    url = "https://www.aclweb.org/anthology/E09-1073",
    pages = "639--647",
}
@inproceedings{peirsman-geeraerts-2009-predicting,
    title = "Predicting Strong Associations on the Basis of Corpus Data",
    author = "Peirsman, Yves  and
      Geeraerts, Dirk",
    booktitle = "Proceedings of the 12th Conference of the {E}uropean Chapter of the {ACL} ({EACL} 2009)",
    month = mar,
    year = "2009",
    address = "Athens, Greece",
    publisher = "Association for Computational Linguistics",
    url = "https://www.aclweb.org/anthology/E09-1074",
    pages = "648--656",
}
@inproceedings{pennacchiotti-wirth-2009-measuring,
    title = "Measuring Frame Relatedness",
    author = "Pennacchiotti, Marco  and
      Wirth, Michael",
    booktitle = "Proceedings of the 12th Conference of the {E}uropean Chapter of the {ACL} ({EACL} 2009)",
    month = mar,
    year = "2009",
    address = "Athens, Greece",
    publisher = "Association for Computational Linguistics",
    url = "https://www.aclweb.org/anthology/E09-1075",
    pages = "657--665",
}
@inproceedings{pinchak-etal-2009-flexible,
    title = "Flexible Answer Typing with Discriminative Preference Ranking",
    author = "Pinchak, Christopher  and
      Lin, Dekang  and
      Rafiei, Davood",
    booktitle = "Proceedings of the 12th Conference of the {E}uropean Chapter of the {ACL} ({EACL} 2009)",
    month = mar,
    year = "2009",
    address = "Athens, Greece",
    publisher = "Association for Computational Linguistics",
    url = "https://www.aclweb.org/anthology/E09-1076",
    pages = "666--674",
}
@inproceedings{rao-ravichandran-2009-semi,
    title = "Semi-Supervised Polarity Lexicon Induction",
    author = "Rao, Delip  and
      Ravichandran, Deepak",
    booktitle = "Proceedings of the 12th Conference of the {E}uropean Chapter of the {ACL} ({EACL} 2009)",
    month = mar,
    year = "2009",
    address = "Athens, Greece",
    publisher = "Association for Computational Linguistics",
    url = "https://www.aclweb.org/anthology/E09-1077",
    pages = "675--682",
}
@inproceedings{rieser-lemon-2009-natural,
    title = "Natural Language Generation as Planning Under Uncertainty for Spoken Dialogue Systems",
    author = "Rieser, Verena  and
      Lemon, Oliver",
    booktitle = "Proceedings of the 12th Conference of the {E}uropean Chapter of the {ACL} ({EACL} 2009)",
    month = mar,
    year = "2009",
    address = "Athens, Greece",
    publisher = "Association for Computational Linguistics",
    url = "https://www.aclweb.org/anthology/E09-1078",
    pages = "683--691",
}
@inproceedings{sajjad-schmid-2009-tagging,
    title = "Tagging {U}rdu Text with Parts of Speech: A Tagger Comparison",
    author = "Sajjad, Hassan  and
      Schmid, Helmut",
    booktitle = "Proceedings of the 12th Conference of the {E}uropean Chapter of the {ACL} ({EACL} 2009)",
    month = mar,
    year = "2009",
    address = "Athens, Greece",
    publisher = "Association for Computational Linguistics",
    url = "https://www.aclweb.org/anthology/E09-1079",
    pages = "692--700",
}
@inproceedings{sangati-zuidema-2009-unsupervised,
    title = "Unsupervised Methods for Head Assignments",
    author = "Sangati, Federico  and
      Zuidema, Willem",
    booktitle = "Proceedings of the 12th Conference of the {E}uropean Chapter of the {ACL} ({EACL} 2009)",
    month = mar,
    year = "2009",
    address = "Athens, Greece",
    publisher = "Association for Computational Linguistics",
    url = "https://www.aclweb.org/anthology/E09-1080",
    pages = "701--709",
}
@inproceedings{schlangen-skantze-2009-general,
    title = "A General, Abstract Model of Incremental Dialogue Processing",
    author = "Schlangen, David  and
      Skantze, Gabriel",
    booktitle = "Proceedings of the 12th Conference of the {E}uropean Chapter of the {ACL} ({EACL} 2009)",
    month = mar,
    year = "2009",
    address = "Athens, Greece",
    publisher = "Association for Computational Linguistics",
    url = "https://www.aclweb.org/anthology/E09-1081",
    pages = "710--718",
}
@inproceedings{schroeder-etal-2009-word,
    title = "Word Lattices for Multi-Source Translation",
    author = "Schroeder, Josh  and
      Cohn, Trevor  and
      Koehn, Philipp",
    booktitle = "Proceedings of the 12th Conference of the {E}uropean Chapter of the {ACL} ({EACL} 2009)",
    month = mar,
    year = "2009",
    address = "Athens, Greece",
    publisher = "Association for Computational Linguistics",
    url = "https://www.aclweb.org/anthology/E09-1082",
    pages = "719--727",
}
@inproceedings{schweitzer-etal-2009-frequency,
    title = "Frequency Matters: Pitch Accents and Information Status",
    author = {Schweitzer, Katrin  and
      Walsh, Michael  and
      M{\"o}bius, Bernd  and
      Riester, Arndt  and
      Schweitzer, Antje  and
      Sch{\"u}tze, Hinrich},
    booktitle = "Proceedings of the 12th Conference of the {E}uropean Chapter of the {ACL} ({EACL} 2009)",
    month = mar,
    year = "2009",
    address = "Athens, Greece",
    publisher = "Association for Computational Linguistics",
    url = "https://www.aclweb.org/anthology/E09-1083",
    pages = "728--736",
}
@inproceedings{simpson-etal-2009-using,
    title = "Using Non-Lexical Features to Identify Effective Indexing Terms for Biomedical Illustrations",
    author = "Simpson, Matthew  and
      Demner-Fushman, Dina  and
      Sneiderman, Charles  and
      Antani, Sameer K.  and
      Thoma, George R.",
    booktitle = "Proceedings of the 12th Conference of the {E}uropean Chapter of the {ACL} ({EACL} 2009)",
    month = mar,
    year = "2009",
    address = "Athens, Greece",
    publisher = "Association for Computational Linguistics",
    url = "https://www.aclweb.org/anthology/E09-1084",
    pages = "737--744",
}
@inproceedings{skantze-schlangen-2009-incremental,
    title = "Incremental Dialogue Processing in a Micro-Domain",
    author = "Skantze, Gabriel  and
      Schlangen, David",
    booktitle = "Proceedings of the 12th Conference of the {E}uropean Chapter of the {ACL} ({EACL} 2009)",
    month = mar,
    year = "2009",
    address = "Athens, Greece",
    publisher = "Association for Computational Linguistics",
    url = "https://www.aclweb.org/anthology/E09-1085",
    pages = "745--753",
}
@inproceedings{sporleder-li-2009-unsupervised,
    title = "Unsupervised Recognition of Literal and Non-Literal Use of Idiomatic Expressions",
    author = "Sporleder, Caroline  and
      Li, Linlin",
    booktitle = "Proceedings of the 12th Conference of the {E}uropean Chapter of the {ACL} ({EACL} 2009)",
    month = mar,
    year = "2009",
    address = "Athens, Greece",
    publisher = "Association for Computational Linguistics",
    url = "https://www.aclweb.org/anthology/E09-1086",
    pages = "754--762",
}
@inproceedings{spoustova-etal-2009-semi,
    title = "Semi-Supervised Training for the Averaged Perceptron {POS} Tagger",
    author = "Spoustov{\'a}, Drahom{\'\i}ra {``}johanka{''}  and
      Haji{\v{c}}, Jan  and
      Raab, Jan  and
      Spousta, Miroslav",
    booktitle = "Proceedings of the 12th Conference of the {E}uropean Chapter of the {ACL} ({EACL} 2009)",
    month = mar,
    year = "2009",
    address = "Athens, Greece",
    publisher = "Association for Computational Linguistics",
    url = "https://www.aclweb.org/anthology/E09-1087",
    pages = "763--771",
}
@inproceedings{sun-tsujii-2009-sequential,
    title = "Sequential Labeling with Latent Variables: An Exact Inference Algorithm and its Efficient Approximation",
    author = "Sun, Xu  and
      Tsujii, Jun{'}ichi",
    booktitle = "Proceedings of the 12th Conference of the {E}uropean Chapter of the {ACL} ({EACL} 2009)",
    month = mar,
    year = "2009",
    address = "Athens, Greece",
    publisher = "Association for Computational Linguistics",
    url = "https://www.aclweb.org/anthology/E09-1088",
    pages = "772--780",
}
@inproceedings{takamura-okumura-2009-text,
    title = "Text Summarization Model Based on Maximum Coverage Problem and its Variant",
    author = "Takamura, Hiroya  and
      Okumura, Manabu",
    booktitle = "Proceedings of the 12th Conference of the {E}uropean Chapter of the {ACL} ({EACL} 2009)",
    month = mar,
    year = "2009",
    address = "Athens, Greece",
    publisher = "Association for Computational Linguistics",
    url = "https://www.aclweb.org/anthology/E09-1089",
    pages = "781--789",
}
@inproceedings{tsuruoka-etal-2009-fast,
    title = "Fast Full Parsing by Linear-Chain Conditional Random Fields",
    author = "Tsuruoka, Yoshimasa  and
      Tsujii, Jun{'}ichi  and
      Ananiadou, Sophia",
    booktitle = "Proceedings of the 12th Conference of the {E}uropean Chapter of the {ACL} ({EACL} 2009)",
    month = mar,
    year = "2009",
    address = "Athens, Greece",
    publisher = "Association for Computational Linguistics",
    url = "https://www.aclweb.org/anthology/E09-1090",
    pages = "790--798",
}
@inproceedings{udupa-etal-2009-mint,
    title = "{MINT}: A Method for Effective and Scalable Mining of Named Entity Transliterations from Large Comparable Corpora",
    author = "Udupa, Raghavendra  and
      Saravanan, K  and
      Kumaran, A  and
      Jagarlamudi, Jagadeesh",
    booktitle = "Proceedings of the 12th Conference of the {E}uropean Chapter of the {ACL} ({EACL} 2009)",
    month = mar,
    year = "2009",
    address = "Athens, Greece",
    publisher = "Association for Computational Linguistics",
    url = "https://www.aclweb.org/anthology/E09-1091",
    pages = "799--807",
}
@inproceedings{van-durme-etal-2009-deriving,
    title = "Deriving Generalized Knowledge from Corpora Using {W}ord{N}et Abstraction",
    author = "Van Durme, Benjamin  and
      Michalak, Phillip  and
      Schubert, Lenhart",
    booktitle = "Proceedings of the 12th Conference of the {E}uropean Chapter of the {ACL} ({EACL} 2009)",
    month = mar,
    year = "2009",
    address = "Athens, Greece",
    publisher = "Association for Computational Linguistics",
    url = "https://www.aclweb.org/anthology/E09-1092",
    pages = "808--816",
}
@inproceedings{van-noord-2009-learning,
    title = "Learning Efficient Parsing",
    author = "van Noord, Gertjan",
    booktitle = "Proceedings of the 12th Conference of the {E}uropean Chapter of the {ACL} ({EACL} 2009)",
    month = mar,
    year = "2009",
    address = "Athens, Greece",
    publisher = "Association for Computational Linguistics",
    url = "https://www.aclweb.org/anthology/E09-1093",
    pages = "817--825",
}
@inproceedings{vandekerckhove-etal-2009-robust,
    title = "A Robust and Extensible Exemplar-Based Model of Thematic Fit",
    author = "Vandekerckhove, Bram  and
      Sandra, Dominiek  and
      Daelemans, Walter",
    booktitle = "Proceedings of the 12th Conference of the {E}uropean Chapter of the {ACL} ({EACL} 2009)",
    month = mar,
    year = "2009",
    address = "Athens, Greece",
    publisher = "Association for Computational Linguistics",
    url = "https://www.aclweb.org/anthology/E09-1094",
    pages = "826--834",
}
@inproceedings{veale-etal-2009-growing,
    title = "Growing Finely-Discriminating Taxonomies from Seeds of Varying Quality and Size",
    author = "Veale, Tony  and
      Li, Guofu  and
      Hao, Yanfen",
    booktitle = "Proceedings of the 12th Conference of the {E}uropean Chapter of the {ACL} ({EACL} 2009)",
    month = mar,
    year = "2009",
    address = "Athens, Greece",
    publisher = "Association for Computational Linguistics",
    url = "https://www.aclweb.org/anthology/E09-1095",
    pages = "835--842",
}
@inproceedings{vu-etal-2009-feature,
    title = "Feature-Based Method for Document Alignment in Comparable News Corpora",
    author = "Vu, Thuy  and
      Aw, Ai Ti  and
      Zhang, Min",
    booktitle = "Proceedings of the 12th Conference of the {E}uropean Chapter of the {ACL} ({EACL} 2009)",
    month = mar,
    year = "2009",
    address = "Athens, Greece",
    publisher = "Association for Computational Linguistics",
    url = "https://www.aclweb.org/anthology/E09-1096",
    pages = "843--851",
}
@inproceedings{wan-etal-2009-improving,
    title = "Improving Grammaticality in Statistical Sentence Generation: Introducing a Dependency Spanning Tree Algorithm with an Argument Satisfaction Model",
    author = "Wan, Stephen  and
      Dras, Mark  and
      Dale, Robert  and
      Paris, C{\'e}cile",
    booktitle = "Proceedings of the 12th Conference of the {E}uropean Chapter of the {ACL} ({EACL} 2009)",
    month = mar,
    year = "2009",
    address = "Athens, Greece",
    publisher = "Association for Computational Linguistics",
    url = "https://www.aclweb.org/anthology/E09-1097",
    pages = "852--860",
}
@inproceedings{washtell-2009-co,
    title = "Co-Dispersion: A Windowless Approach to Lexical Association",
    author = "Washtell, Justin",
    booktitle = "Proceedings of the 12th Conference of the {E}uropean Chapter of the {ACL} ({EACL} 2009)",
    month = mar,
    year = "2009",
    address = "Athens, Greece",
    publisher = "Association for Computational Linguistics",
    url = "https://www.aclweb.org/anthology/E09-1098",
    pages = "861--869",
}
@inproceedings{xia-etal-2009-language,
    title = "Language {ID} in the Context of Harvesting Language Data off the Web",
    author = "Xia, Fei  and
      Lewis, William  and
      Poon, Hoifung",
    booktitle = "Proceedings of the 12th Conference of the {E}uropean Chapter of the {ACL} ({EACL} 2009)",
    month = mar,
    year = "2009",
    address = "Athens, Greece",
    publisher = "Association for Computational Linguistics",
    url = "https://www.aclweb.org/anthology/E09-1099",
    pages = "870--878",
}
@inproceedings{zhao-2009-character,
    title = "Character-Level Dependencies in {C}hinese: Usefulness and Learning",
    author = "Zhao, Hai",
    booktitle = "Proceedings of the 12th Conference of the {E}uropean Chapter of the {ACL} ({EACL} 2009)",
    month = mar,
    year = "2009",
    address = "Athens, Greece",
    publisher = "Association for Computational Linguistics",
    url = "https://www.aclweb.org/anthology/E09-1100",
    pages = "879--887",
}
@proceedings{eacl-2009-demonstrations,
    title = "Proceedings of the Demonstrations Session at {EACL} 2009",
    author = {Kreutel, J{\"o}rn},
    month = apr,
    year = "2009",
    address = "Athens, Greece",
    publisher = "Association for Computational Linguistics",
    url = "https://www.aclweb.org/anthology/E09-2000",
}
@inproceedings{benotti-2009-frolog,
    title = "{F}rolog: an Accommodating Text-Adventure Game",
    author = "Benotti, Luciana",
    booktitle = "Proceedings of the Demonstrations Session at {EACL} 2009",
    month = apr,
    year = "2009",
    address = "Athens, Greece",
    publisher = "Association for Computational Linguistics",
    url = "https://www.aclweb.org/anthology/E09-2001",
    pages = "1--4",
}
@inproceedings{bossard-etal-2009-cbseas,
    title = "{CBSEAS}, a Summarization System {--} Integration of Opinion Mining Techniques to Summarize Blogs",
    author = "Bossard, Aur{\'e}lien  and
      G{\'e}n{\'e}reux, Michel  and
      Poibeau, Thierry",
    booktitle = "Proceedings of the Demonstrations Session at {EACL} 2009",
    month = apr,
    year = "2009",
    address = "Athens, Greece",
    publisher = "Association for Computational Linguistics",
    url = "https://www.aclweb.org/anthology/E09-2002",
    pages = "5--8",
}
@inproceedings{bringert-etal-2009-grammatical,
    title = "Grammatical Framework Web Service",
    author = {Bringert, Bj{\"o}rn  and
      Angelov, Krasimir  and
      Ranta, Aarne},
    booktitle = "Proceedings of the Demonstrations Session at {EACL} 2009",
    month = apr,
    year = "2009",
    address = "Athens, Greece",
    publisher = "Association for Computational Linguistics",
    url = "https://www.aclweb.org/anthology/E09-2003",
    pages = "9--12",
}
@inproceedings{cheng-etal-2009-gossip,
    title = "Gossip Galore {--} A Self-Learning Agent for Exchanging Pop Trivia",
    author = "Cheng, Xiwen  and
      Adolphs, Peter  and
      Xu, Feiyu  and
      Uszkoreit, Hans  and
      Li, Hong",
    booktitle = "Proceedings of the Demonstrations Session at {EACL} 2009",
    month = apr,
    year = "2009",
    address = "Athens, Greece",
    publisher = "Association for Computational Linguistics",
    url = "https://www.aclweb.org/anthology/E09-2004",
    pages = "13--16",
}
@inproceedings{galanis-etal-2009-open,
    title = "An Open-Source Natural Language Generator for {OWL} Ontologies and its Use in Protege and Second Life",
    author = "Galanis, Dimitrios  and
      Karakatsiotis, George  and
      Lampouras, Gerasimos  and
      Androutsopoulos, Ion",
    booktitle = "Proceedings of the Demonstrations Session at {EACL} 2009",
    month = apr,
    year = "2009",
    address = "Athens, Greece",
    publisher = "Association for Computational Linguistics",
    url = "https://www.aclweb.org/anthology/E09-2005",
    pages = "17--20",
}
@inproceedings{gleim-etal-2009-ehumanities,
    title = "e{H}umanities {D}esktop - An Online System for Corpus Management and Analysis in Support of Computing in the Humanities",
    author = {Gleim, R{\"u}diger  and
      Waltinger, Ulli  and
      Ernst, Alexandra  and
      Mehler, Alexander  and
      Feith, Tobias  and
      Esch, Dietmar},
    booktitle = "Proceedings of the Demonstrations Session at {EACL} 2009",
    month = apr,
    year = "2009",
    address = "Athens, Greece",
    publisher = "Association for Computational Linguistics",
    url = "https://www.aclweb.org/anthology/E09-2006",
    pages = "21--24",
}
@inproceedings{harbusch-etal-2009-comparison,
    title = "A Comparison of Clausal Coordinate Ellipsis in {E}stonian and {G}erman: Remarkably Similar Elision Rules Allow a Language-Independent Ellipsis-Generation Module",
    author = "Harbusch, Karin  and
      Koit, Mare  and
      {\~O}im, Haldur",
    booktitle = "Proceedings of the Demonstrations Session at {EACL} 2009",
    month = apr,
    year = "2009",
    address = "Athens, Greece",
    publisher = "Association for Computational Linguistics",
    url = "https://www.aclweb.org/anthology/E09-2007",
    pages = "25--28",
}
@inproceedings{hulden-2009-foma,
    title = "{F}oma: a Finite-State Compiler and Library",
    author = "Hulden, Mans",
    booktitle = "Proceedings of the Demonstrations Session at {EACL} 2009",
    month = apr,
    year = "2009",
    address = "Athens, Greece",
    publisher = "Association for Computational Linguistics",
    url = "https://www.aclweb.org/anthology/E09-2008",
    pages = "29--32",
}
@inproceedings{koller-etal-2009-software,
    title = "The Software Architecture for the First Challenge on Generating Instructions in Virtual Environments",
    author = "Koller, Alexander  and
      Byron, Donna  and
      Cassell, Justine  and
      Dale, Robert  and
      Moore, Johanna  and
      Oberlander, Jon  and
      Striegnitz, Kristina",
    booktitle = "Proceedings of the Demonstrations Session at {EACL} 2009",
    month = apr,
    year = "2009",
    address = "Athens, Greece",
    publisher = "Association for Computational Linguistics",
    url = "https://www.aclweb.org/anthology/E09-2009",
    pages = "33--36",
}
@inproceedings{konstantopoulos-etal-2009-adaptive,
    title = "Adaptive Natural Language Interaction",
    author = "Konstantopoulos, Stasinos  and
      Tegos, Athanasios  and
      Bilidas, Dimitrios  and
      Androutsopoulos, Ion  and
      Lampouras, Gerasimos  and
      Matheson, Colin  and
      Deroo, Olivier  and
      Malakasiotis, Prodromos",
    booktitle = "Proceedings of the Demonstrations Session at {EACL} 2009",
    month = apr,
    year = "2009",
    address = "Athens, Greece",
    publisher = "Association for Computational Linguistics",
    url = "https://www.aclweb.org/anthology/E09-2010",
    pages = "37--40",
}
@inproceedings{lewis-xia-2009-parsing,
    title = "Parsing, Projecting {\&} Prototypes: Repurposing Linguistic Data on the Web",
    author = "Lewis, William  and
      Xia, Fei",
    booktitle = "Proceedings of the Demonstrations Session at {EACL} 2009",
    month = apr,
    year = "2009",
    address = "Athens, Greece",
    publisher = "Association for Computational Linguistics",
    url = "https://www.aclweb.org/anthology/E09-2011",
    pages = "41--44",
}
@inproceedings{michou-seretan-2009-tool,
    title = "A Tool for Multi-Word Expression Extraction in Modern {G}reek Using Syntactic Parsing",
    author = "Michou, Athina  and
      Seretan, Violeta",
    booktitle = "Proceedings of the Demonstrations Session at {EACL} 2009",
    month = apr,
    year = "2009",
    address = "Athens, Greece",
    publisher = "Association for Computational Linguistics",
    url = "https://www.aclweb.org/anthology/E09-2012",
    pages = "45--48",
}
@inproceedings{miltsakaki-2009-matching,
    title = "Matching Readers{'} Preferences and Reading Skills with Appropriate Web Texts",
    author = "Miltsakaki, Eleni",
    booktitle = "Proceedings of the Demonstrations Session at {EACL} 2009",
    month = apr,
    year = "2009",
    address = "Athens, Greece",
    publisher = "Association for Computational Linguistics",
    url = "https://www.aclweb.org/anthology/E09-2013",
    pages = "49--52",
}
@inproceedings{pastra-balta-2009-text,
    title = "A Text-Based Search Interface for Multimedia Dialectics",
    author = "Pastra, Katerina  and
      Balta, Eirini",
    booktitle = "Proceedings of the Demonstrations Session at {EACL} 2009",
    month = apr,
    year = "2009",
    address = "Athens, Greece",
    publisher = "Association for Computational Linguistics",
    url = "https://www.aclweb.org/anthology/E09-2014",
    pages = "53--56",
}
@inproceedings{ranta-etal-2009-grammar,
    title = "Grammar Development in {GF}",
    author = {Ranta, Aarne  and
      Angelov, Krasimir  and
      Bringert, Bj{\"o}rn},
    booktitle = "Proceedings of the Demonstrations Session at {EACL} 2009",
    month = apr,
    year = "2009",
    address = "Athens, Greece",
    publisher = "Association for Computational Linguistics",
    url = "https://www.aclweb.org/anthology/E09-2015",
    pages = "57--60",
}
@inproceedings{sasaki-etal-2009-three,
    title = "Three {B}io{NLP} Tools Powered by a Biological Lexicon",
    author = "Sasaki, Yutaka  and
      Thompson, Paul  and
      McNaught, John  and
      Ananiadou, Sophia",
    booktitle = "Proceedings of the Demonstrations Session at {EACL} 2009",
    month = apr,
    year = "2009",
    address = "Athens, Greece",
    publisher = "Association for Computational Linguistics",
    url = "https://www.aclweb.org/anthology/E09-2016",
    pages = "61--64",
}
@inproceedings{stahl-etal-2009-mobile,
    title = "A Mobile Health and Fitness Companion Demonstrator",
    author = {St{\aa}hl, Olov  and
      Gamb{\"a}ck, Bj{\"o}rn  and
      Turunen, Markku  and
      Hakulinen, Jaakko},
    booktitle = "Proceedings of the Demonstrations Session at {EACL} 2009",
    month = apr,
    year = "2009",
    address = "Athens, Greece",
    publisher = "Association for Computational Linguistics",
    url = "https://www.aclweb.org/anthology/E09-2017",
    pages = "65--68",
}
@proceedings{eacl-2009-student,
    title = "Proceedings of the Student Research Workshop at {EACL} 2009",
    author = "Demberg, Vera  and
      Ma, Yanjun  and
      Reiter, Nils",
    month = apr,
    year = "2009",
    address = "Athens, Greece",
    publisher = "Association for Computational Linguistics",
    url = "https://www.aclweb.org/anthology/E09-3000",
}
@inproceedings{aimetti-2009-modelling,
    title = "Modelling Early Language Acquisition Skills: Towards a General Statistical Learning Mechanism",
    author = "Aimetti, Guillaume",
    booktitle = "Proceedings of the Student Research Workshop at {EACL} 2009",
    month = apr,
    year = "2009",
    address = "Athens, Greece",
    publisher = "Association for Computational Linguistics",
    url = "https://www.aclweb.org/anthology/E09-3001",
    pages = "1--9",
}
@inproceedings{boonkwan-2009-memory,
    title = "A Memory-Based Approach to the Treatment of Serial Verb Construction in {C}ombinatory {C}ategorial {G}rammar",
    author = "Boonkwan, Prachya",
    booktitle = "Proceedings of the Student Research Workshop at {EACL} 2009",
    month = apr,
    year = "2009",
    address = "Athens, Greece",
    publisher = "Association for Computational Linguistics",
    url = "https://www.aclweb.org/anthology/E09-3002",
    pages = "10--18",
}
@inproceedings{francois-2009-combining,
    title = "Combining a Statistical Language Model with Logistic Regression to Predict the Lexical and Syntactic Difficulty of Texts for {FFL}",
    author = "Fran{\c{c}}ois, Thomas",
    booktitle = "Proceedings of the Student Research Workshop at {EACL} 2009",
    month = apr,
    year = "2009",
    address = "Athens, Greece",
    publisher = "Association for Computational Linguistics",
    url = "https://www.aclweb.org/anthology/E09-3003",
    pages = "19--27",
}
@inproceedings{herbelot-2009-finding,
    title = "Finding Word Substitutions Using a Distributional Similarity Baseline and Immediate Context Overlap",
    author = "Herbelot, Aurelie",
    booktitle = "Proceedings of the Student Research Workshop at {EACL} 2009",
    month = apr,
    year = "2009",
    address = "Athens, Greece",
    publisher = "Association for Computational Linguistics",
    url = "https://www.aclweb.org/anthology/E09-3004",
    pages = "28--36",
}
@inproceedings{plank-2009-structural,
    title = "Structural Correspondence Learning for Parse Disambiguation",
    author = "Plank, Barbara",
    booktitle = "Proceedings of the Student Research Workshop at {EACL} 2009",
    month = apr,
    year = "2009",
    address = "Athens, Greece",
    publisher = "Association for Computational Linguistics",
    url = "https://www.aclweb.org/anthology/E09-3005",
    pages = "37--45",
}
@inproceedings{recasens-2009-chain,
    title = "A Chain-starting Classifier of Definite {NP}s in {S}panish",
    author = "Recasens, Marta",
    booktitle = "Proceedings of the Student Research Workshop at {EACL} 2009",
    month = apr,
    year = "2009",
    address = "Athens, Greece",
    publisher = "Association for Computational Linguistics",
    url = "https://www.aclweb.org/anthology/E09-3006",
    pages = "46--53",
}
@inproceedings{sidorova-2009-speech,
    title = "Speech Emotion Recognition With {TGI}+.2 Classifier",
    author = "Sidorova, Julia",
    booktitle = "Proceedings of the Student Research Workshop at {EACL} 2009",
    month = apr,
    year = "2009",
    address = "Athens, Greece",
    publisher = "Association for Computational Linguistics",
    url = "https://www.aclweb.org/anthology/E09-3007",
    pages = "54--60",
}
@inproceedings{stymne-2009-comparison,
    title = "A Comparison of Merging Strategies for Translation of {G}erman Compounds",
    author = "Stymne, Sara",
    booktitle = "Proceedings of the Student Research Workshop at {EACL} 2009",
    month = apr,
    year = "2009",
    address = "Athens, Greece",
    publisher = "Association for Computational Linguistics",
    url = "https://www.aclweb.org/anthology/E09-3008",
    pages = "61--69",
}
@inproceedings{tsatsaronis-panagiotopoulou-2009-generalized,
    title = "A Generalized Vector Space Model for Text Retrieval Based on Semantic Relatedness",
    author = "Tsatsaronis, George  and
      Panagiotopoulou, Vicky",
    booktitle = "Proceedings of the Student Research Workshop at {EACL} 2009",
    month = apr,
    year = "2009",
    address = "Athens, Greece",
    publisher = "Association for Computational Linguistics",
    url = "https://www.aclweb.org/anthology/E09-3009",
    pages = "70--78",
}
@inproceedings{wennerberg-2009-aligning,
    title = "Aligning Medical Domain Ontologies for Clinical Query Extraction",
    author = "Wennerberg, Pinar",
    booktitle = "Proceedings of the Student Research Workshop at {EACL} 2009",
    month = apr,
    year = "2009",
    address = "Athens, Greece",
    publisher = "Association for Computational Linguistics",
    url = "https://www.aclweb.org/anthology/E09-3010",
    pages = "79--87",
}
@inproceedings{westerhout-2009-extraction,
    title = "Extraction of Definitions Using Grammar-Enhanced Machine Learning",
    author = "Westerhout, Eline",
    booktitle = "Proceedings of the Student Research Workshop at {EACL} 2009",
    month = apr,
    year = "2009",
    address = "Athens, Greece",
    publisher = "Association for Computational Linguistics",
    url = "https://www.aclweb.org/anthology/E09-3011",
    pages = "88--96",
}
@proceedings{acl-2006-international,
    title = "Proceedings of the 21st International Conference on Computational Linguistics and 44th Annual Meeting of the Association for Computational Linguistics",
    author = "Calzolari, Nicoletta  and
      Cardie, Claire  and
      Isabelle, Pierre",
    month = jul,
    year = "2006",
    address = "Sydney, Australia",
    publisher = "Association for Computational Linguistics",
    url = "https://www.aclweb.org/anthology/P06-1000",
}
@inproceedings{sadat-habash-2006-combination,
    title = "Combination of {A}rabic Preprocessing Schemes for Statistical Machine Translation",
    author = "Sadat, Fatiha  and
      Habash, Nizar",
    booktitle = "Proceedings of the 21st International Conference on Computational Linguistics and 44th Annual Meeting of the Association for Computational Linguistics",
    month = jul,
    year = "2006",
    address = "Sydney, Australia",
    publisher = "Association for Computational Linguistics",
    url = "https://www.aclweb.org/anthology/P06-1001",
    doi = "10.3115/1220175.1220176",
    pages = "1--8",
}
@inproceedings{ayan-dorr-2006-going,
    title = "Going Beyond {AER}: An Extensive Analysis of Word Alignments and Their Impact on {MT}",
    author = "Ayan, Necip Fazil  and
      Dorr, Bonnie J.",
    booktitle = "Proceedings of the 21st International Conference on Computational Linguistics and 44th Annual Meeting of the Association for Computational Linguistics",
    month = jul,
    year = "2006",
    address = "Sydney, Australia",
    publisher = "Association for Computational Linguistics",
    url = "https://www.aclweb.org/anthology/P06-1002",
    doi = "10.3115/1220175.1220177",
    pages = "9--16",
}
@inproceedings{purver-etal-2006-unsupervised,
    title = "Unsupervised Topic Modelling for Multi-Party Spoken Discourse",
    author = {Purver, Matthew  and
      K{\"o}rding, Konrad P.  and
      Griffiths, Thomas L.  and
      Tenenbaum, Joshua B.},
    booktitle = "Proceedings of the 21st International Conference on Computational Linguistics and 44th Annual Meeting of the Association for Computational Linguistics",
    month = jul,
    year = "2006",
    address = "Sydney, Australia",
    publisher = "Association for Computational Linguistics",
    url = "https://www.aclweb.org/anthology/P06-1003",
    doi = "10.3115/1220175.1220178",
    pages = "17--24",
}
@inproceedings{malioutov-barzilay-2006-minimum,
    title = "Minimum Cut Model for Spoken Lecture Segmentation",
    author = "Malioutov, Igor  and
      Barzilay, Regina",
    booktitle = "Proceedings of the 21st International Conference on Computational Linguistics and 44th Annual Meeting of the Association for Computational Linguistics",
    month = jul,
    year = "2006",
    address = "Sydney, Australia",
    publisher = "Association for Computational Linguistics",
    url = "https://www.aclweb.org/anthology/P06-1004",
    doi = "10.3115/1220175.1220179",
    pages = "25--32",
}
@inproceedings{bergsma-lin-2006-bootstrapping,
    title = "Bootstrapping Path-Based Pronoun Resolution",
    author = "Bergsma, Shane  and
      Lin, Dekang",
    booktitle = "Proceedings of the 21st International Conference on Computational Linguistics and 44th Annual Meeting of the Association for Computational Linguistics",
    month = jul,
    year = "2006",
    address = "Sydney, Australia",
    publisher = "Association for Computational Linguistics",
    url = "https://www.aclweb.org/anthology/P06-1005",
    doi = "10.3115/1220175.1220180",
    pages = "33--40",
}
@inproceedings{yang-etal-2006-kernel,
    title = "Kernel-Based Pronoun Resolution with Structured Syntactic Knowledge",
    author = "Yang, Xiaofeng  and
      Su, Jian  and
      Tan, Chew Lim",
    booktitle = "Proceedings of the 21st International Conference on Computational Linguistics and 44th Annual Meeting of the Association for Computational Linguistics",
    month = jul,
    year = "2006",
    address = "Sydney, Australia",
    publisher = "Association for Computational Linguistics",
    url = "https://www.aclweb.org/anthology/P06-1006",
    doi = "10.3115/1220175.1220181",
    pages = "41--48",
}
@inproceedings{park-brew-2006-finite,
    title = "A Finite-State Model of Human Sentence Processing",
    author = "Park, Jihyun  and
      Brew, Chris",
    booktitle = "Proceedings of the 21st International Conference on Computational Linguistics and 44th Annual Meeting of the Association for Computational Linguistics",
    month = jul,
    year = "2006",
    address = "Sydney, Australia",
    publisher = "Association for Computational Linguistics",
    url = "https://www.aclweb.org/anthology/P06-1007",
    doi = "10.3115/1220175.1220182",
    pages = "49--56",
}
@inproceedings{blache-etal-2006-acceptability,
    title = "Acceptability Prediction by Means of Grammaticality Quantification",
    author = "Blache, Philippe  and
      Hemforth, Barbara  and
      Rauzy, St{\'e}phane",
    booktitle = "Proceedings of the 21st International Conference on Computational Linguistics and 44th Annual Meeting of the Association for Computational Linguistics",
    month = jul,
    year = "2006",
    address = "Sydney, Australia",
    publisher = "Association for Computational Linguistics",
    url = "https://www.aclweb.org/anthology/P06-1008",
    doi = "10.3115/1220175.1220183",
    pages = "57--64",
}
@inproceedings{blunsom-cohn-2006-discriminative,
    title = "Discriminative Word Alignment with Conditional Random Fields",
    author = "Blunsom, Phil  and
      Cohn, Trevor",
    booktitle = "Proceedings of the 21st International Conference on Computational Linguistics and 44th Annual Meeting of the Association for Computational Linguistics",
    month = jul,
    year = "2006",
    address = "Sydney, Australia",
    publisher = "Association for Computational Linguistics",
    url = "https://www.aclweb.org/anthology/P06-1009",
    doi = "10.3115/1220175.1220184",
    pages = "65--72",
}
@inproceedings{sproat-etal-2006-named,
    title = "Named Entity Transliteration with Comparable Corpora",
    author = "Sproat, Richard  and
      Tao, Tao  and
      Zhai, ChengXiang",
    booktitle = "Proceedings of the 21st International Conference on Computational Linguistics and 44th Annual Meeting of the Association for Computational Linguistics",
    month = jul,
    year = "2006",
    address = "Sydney, Australia",
    publisher = "Association for Computational Linguistics",
    url = "https://www.aclweb.org/anthology/P06-1010",
    doi = "10.3115/1220175.1220185",
    pages = "73--80",
}
@inproceedings{munteanu-marcu-2006-extracting,
    title = "Extracting Parallel Sub-Sentential Fragments from Non-Parallel Corpora",
    author = "Munteanu, Dragos Stefan  and
      Marcu, Daniel",
    booktitle = "Proceedings of the 21st International Conference on Computational Linguistics and 44th Annual Meeting of the Association for Computational Linguistics",
    month = jul,
    year = "2006",
    address = "Sydney, Australia",
    publisher = "Association for Computational Linguistics",
    url = "https://www.aclweb.org/anthology/P06-1011",
    doi = "10.3115/1220175.1220186",
    pages = "81--88",
}
@inproceedings{chan-ng-2006-estimating,
    title = "Estimating Class Priors in Domain Adaptation for Word Sense Disambiguation",
    author = "Chan, Yee Seng  and
      Ng, Hwee Tou",
    booktitle = "Proceedings of the 21st International Conference on Computational Linguistics and 44th Annual Meeting of the Association for Computational Linguistics",
    month = jul,
    year = "2006",
    address = "Sydney, Australia",
    publisher = "Association for Computational Linguistics",
    url = "https://www.aclweb.org/anthology/P06-1012",
    doi = "10.3115/1220175.1220187",
    pages = "89--96",
}
@inproceedings{brody-etal-2006-ensemble,
    title = "Ensemble Methods for Unsupervised {WSD}",
    author = "Brody, Samuel  and
      Navigli, Roberto  and
      Lapata, Mirella",
    booktitle = "Proceedings of the 21st International Conference on Computational Linguistics and 44th Annual Meeting of the Association for Computational Linguistics",
    month = jul,
    year = "2006",
    address = "Sydney, Australia",
    publisher = "Association for Computational Linguistics",
    url = "https://www.aclweb.org/anthology/P06-1013",
    doi = "10.3115/1220175.1220188",
    pages = "97--104",
}
@inproceedings{navigli-2006-meaningful,
    title = "Meaningful Clustering of Senses Helps Boost Word Sense Disambiguation Performance",
    author = "Navigli, Roberto",
    booktitle = "Proceedings of the 21st International Conference on Computational Linguistics and 44th Annual Meeting of the Association for Computational Linguistics",
    month = jul,
    year = "2006",
    address = "Sydney, Australia",
    publisher = "Association for Computational Linguistics",
    url = "https://www.aclweb.org/anthology/P06-1014",
    doi = "10.3115/1220175.1220189",
    pages = "105--112",
}
@inproceedings{pantel-pennacchiotti-2006-espresso,
    title = "{E}spresso: Leveraging Generic Patterns for Automatically Harvesting Semantic Relations",
    author = "Pantel, Patrick  and
      Pennacchiotti, Marco",
    booktitle = "Proceedings of the 21st International Conference on Computational Linguistics and 44th Annual Meeting of the Association for Computational Linguistics",
    month = jul,
    year = "2006",
    address = "Sydney, Australia",
    publisher = "Association for Computational Linguistics",
    url = "https://www.aclweb.org/anthology/P06-1015",
    doi = "10.3115/1220175.1220190",
    pages = "113--120",
}
@inproceedings{zhou-etal-2006-modeling,
    title = "Modeling Commonality among Related Classes in Relation Extraction",
    author = "Zhou, GuoDong  and
      Su, Jian  and
      Zhang, Min",
    booktitle = "Proceedings of the 21st International Conference on Computational Linguistics and 44th Annual Meeting of the Association for Computational Linguistics",
    month = jul,
    year = "2006",
    address = "Sydney, Australia",
    publisher = "Association for Computational Linguistics",
    url = "https://www.aclweb.org/anthology/P06-1016",
    doi = "10.3115/1220175.1220191",
    pages = "121--128",
}
@inproceedings{chen-etal-2006-relation,
    title = "Relation Extraction Using Label Propagation Based Semi-Supervised Learning",
    author = "Chen, Jinxiu  and
      Ji, Donghong  and
      Tan, Chew Lim  and
      Niu, Zhengyu",
    booktitle = "Proceedings of the 21st International Conference on Computational Linguistics and 44th Annual Meeting of the Association for Computational Linguistics",
    month = jul,
    year = "2006",
    address = "Sydney, Australia",
    publisher = "Association for Computational Linguistics",
    url = "https://www.aclweb.org/anthology/P06-1017",
    doi = "10.3115/1220175.1220192",
    pages = "129--136",
}
@inproceedings{kahane-2006-polarized,
    title = "Polarized Unification Grammars",
    author = "Kahane, Sylvain",
    booktitle = "Proceedings of the 21st International Conference on Computational Linguistics and 44th Annual Meeting of the Association for Computational Linguistics",
    month = jul,
    year = "2006",
    address = "Sydney, Australia",
    publisher = "Association for Computational Linguistics",
    url = "https://www.aclweb.org/anthology/P06-1018",
    doi = "10.3115/1220175.1220193",
    pages = "137--144",
}
@inproceedings{cohen-sygal-wintner-2006-partially,
    title = "Partially Specified Signatures: A Vehicle for Grammar Modularity",
    author = "Cohen-Sygal, Yael  and
      Wintner, Shuly",
    booktitle = "Proceedings of the 21st International Conference on Computational Linguistics and 44th Annual Meeting of the Association for Computational Linguistics",
    month = jul,
    year = "2006",
    address = "Sydney, Australia",
    publisher = "Association for Computational Linguistics",
    url = "https://www.aclweb.org/anthology/P06-1019",
    doi = "10.3115/1220175.1220194",
    pages = "145--152",
}
@inproceedings{cetinoglu-oflazer-2006-morphology,
    title = "Morphology-Syntax Interface for {T}urkish {LFG}",
    author = {{\c{C}}etino{\u{g}}lu, {\"O}zlem  and
      Oflazer, Kemal},
    booktitle = "Proceedings of the 21st International Conference on Computational Linguistics and 44th Annual Meeting of the Association for Computational Linguistics",
    month = jul,
    year = "2006",
    address = "Sydney, Australia",
    publisher = "Association for Computational Linguistics",
    url = "https://www.aclweb.org/anthology/P06-1020",
    doi = "10.3115/1220175.1220195",
    pages = "153--160",
}
@inproceedings{hale-etal-2006-pcfgs,
    title = "{PCFG}s with Syntactic and Prosodic Indicators of Speech Repairs",
    author = "Hale, John  and
      Shafran, Izhak  and
      Yung, Lisa  and
      Dorr, Bonnie J.  and
      Harper, Mary  and
      Krasnyanskaya, Anna  and
      Lease, Matthew  and
      Liu, Yang  and
      Roark, Brian  and
      Snover, Matthew  and
      Stewart, Robin",
    booktitle = "Proceedings of the 21st International Conference on Computational Linguistics and 44th Annual Meeting of the Association for Computational Linguistics",
    month = jul,
    year = "2006",
    address = "Sydney, Australia",
    publisher = "Association for Computational Linguistics",
    url = "https://www.aclweb.org/anthology/P06-1021",
    doi = "10.3115/1220175.1220196",
    pages = "161--168",
}
@inproceedings{ohno-etal-2006-dependency,
    title = "Dependency Parsing of {J}apanese Spoken Monologue Based on Clause Boundaries",
    author = "Ohno, Tomohiro  and
      Matsubara, Shigeki  and
      Kashioka, Hideki  and
      Maruyama, Takehiko  and
      Inagaki, Yasuyoshi",
    booktitle = "Proceedings of the 21st International Conference on Computational Linguistics and 44th Annual Meeting of the Association for Computational Linguistics",
    month = jul,
    year = "2006",
    address = "Sydney, Australia",
    publisher = "Association for Computational Linguistics",
    url = "https://www.aclweb.org/anthology/P06-1022",
    doi = "10.3115/1220175.1220197",
    pages = "169--176",
}
@inproceedings{schmid-2006-trace,
    title = "Trace Prediction and Recovery with Unlexicalized {PCFG}s and Slash Features",
    author = "Schmid, Helmut",
    booktitle = "Proceedings of the 21st International Conference on Computational Linguistics and 44th Annual Meeting of the Association for Computational Linguistics",
    month = jul,
    year = "2006",
    address = "Sydney, Australia",
    publisher = "Association for Computational Linguistics",
    url = "https://www.aclweb.org/anthology/P06-1023",
    doi = "10.3115/1220175.1220198",
    pages = "177--184",
}
@inproceedings{frampton-lemon-2006-learning,
    title = "Learning More Effective Dialogue Strategies Using Limited Dialogue Move Features",
    author = "Frampton, Matthew  and
      Lemon, Oliver",
    booktitle = "Proceedings of the 21st International Conference on Computational Linguistics and 44th Annual Meeting of the Association for Computational Linguistics",
    month = jul,
    year = "2006",
    address = "Sydney, Australia",
    publisher = "Association for Computational Linguistics",
    url = "https://www.aclweb.org/anthology/P06-1024",
    doi = "10.3115/1220175.1220199",
    pages = "185--192",
}
@inproceedings{rotaru-litman-2006-dependencies,
    title = "Dependencies between Student State and Speech Recognition Problems in Spoken Tutoring Dialogues",
    author = "Rotaru, Mihai  and
      Litman, Diane J.",
    booktitle = "Proceedings of the 21st International Conference on Computational Linguistics and 44th Annual Meeting of the Association for Computational Linguistics",
    month = jul,
    year = "2006",
    address = "Sydney, Australia",
    publisher = "Association for Computational Linguistics",
    url = "https://www.aclweb.org/anthology/P06-1025",
    doi = "10.3115/1220175.1220200",
    pages = "193--200",
}
@inproceedings{bangalore-etal-2006-learning,
    title = "Learning the Structure of Task-Driven Human-Human Dialogs",
    author = "Bangalore, Srinivas  and
      Di Fabbrizio, Giuseppe  and
      Stent, Amanda",
    booktitle = "Proceedings of the 21st International Conference on Computational Linguistics and 44th Annual Meeting of the Association for Computational Linguistics",
    month = jul,
    year = "2006",
    address = "Sydney, Australia",
    publisher = "Association for Computational Linguistics",
    url = "https://www.aclweb.org/anthology/P06-1026",
    doi = "10.3115/1220175.1220201",
    pages = "201--208",
}
@inproceedings{jiao-etal-2006-semi,
    title = "Semi-Supervised Conditional Random Fields for Improved Sequence Segmentation and Labeling",
    author = "Jiao, Feng  and
      Wang, Shaojun  and
      Lee, Chi-Hoon  and
      Greiner, Russell  and
      Schuurmans, Dale",
    booktitle = "Proceedings of the 21st International Conference on Computational Linguistics and 44th Annual Meeting of the Association for Computational Linguistics",
    month = jul,
    year = "2006",
    address = "Sydney, Australia",
    publisher = "Association for Computational Linguistics",
    url = "https://www.aclweb.org/anthology/P06-1027",
    doi = "10.3115/1220175.1220202",
    pages = "209--216",
}
@inproceedings{suzuki-etal-2006-training,
    title = "Training Conditional Random Fields with Multivariate Evaluation Measures",
    author = "Suzuki, Jun  and
      McDermott, Erik  and
      Isozaki, Hideki",
    booktitle = "Proceedings of the 21st International Conference on Computational Linguistics and 44th Annual Meeting of the Association for Computational Linguistics",
    month = jul,
    year = "2006",
    address = "Sydney, Australia",
    publisher = "Association for Computational Linguistics",
    url = "https://www.aclweb.org/anthology/P06-1028",
    doi = "10.3115/1220175.1220203",
    pages = "217--224",
}
@inproceedings{gao-etal-2006-approximation,
    title = "Approximation Lasso Methods for Language Modeling",
    author = "Gao, Jianfeng  and
      Suzuki, Hisami  and
      Yu, Bin",
    booktitle = "Proceedings of the 21st International Conference on Computational Linguistics and 44th Annual Meeting of the Association for Computational Linguistics",
    month = jul,
    year = "2006",
    address = "Sydney, Australia",
    publisher = "Association for Computational Linguistics",
    url = "https://www.aclweb.org/anthology/P06-1029",
    doi = "10.3115/1220175.1220204",
    pages = "225--232",
}
@inproceedings{ishioka-kameda-2006-automated,
    title = "Automated {J}apanese Essay Scoring System based on Articles Written by Experts",
    author = "Ishioka, Tsunenori  and
      Kameda, Masayuki",
    booktitle = "Proceedings of the 21st International Conference on Computational Linguistics and 44th Annual Meeting of the Association for Computational Linguistics",
    month = jul,
    year = "2006",
    address = "Sydney, Australia",
    publisher = "Association for Computational Linguistics",
    url = "https://www.aclweb.org/anthology/P06-1030",
    doi = "10.3115/1220175.1220205",
    pages = "233--240",
}
@inproceedings{nagata-etal-2006-feedback,
    title = "A Feedback-Augmented Method for Detecting Errors in the Writing of Learners of {E}nglish",
    author = "Nagata, Ryo  and
      Kawai, Atsuo  and
      Morihiro, Koichiro  and
      Isu, Naoki",
    booktitle = "Proceedings of the 21st International Conference on Computational Linguistics and 44th Annual Meeting of the Association for Computational Linguistics",
    month = jul,
    year = "2006",
    address = "Sydney, Australia",
    publisher = "Association for Computational Linguistics",
    url = "https://www.aclweb.org/anthology/P06-1031",
    doi = "10.3115/1220175.1220206",
    pages = "241--248",
}
@inproceedings{brockett-etal-2006-correcting,
    title = "Correcting {ESL} Errors Using Phrasal {SMT} Techniques",
    author = "Brockett, Chris  and
      Dolan, William B.  and
      Gamon, Michael",
    booktitle = "Proceedings of the 21st International Conference on Computational Linguistics and 44th Annual Meeting of the Association for Computational Linguistics",
    month = jul,
    year = "2006",
    address = "Sydney, Australia",
    publisher = "Association for Computational Linguistics",
    url = "https://www.aclweb.org/anthology/P06-1032",
    doi = "10.3115/1220175.1220207",
    pages = "249--256",
}
@inproceedings{nilsson-etal-2006-graph,
    title = "Graph Transformations in Data-Driven Dependency Parsing",
    author = "Nilsson, Jens  and
      Nivre, Joakim  and
      Hall, Johan",
    booktitle = "Proceedings of the 21st International Conference on Computational Linguistics and 44th Annual Meeting of the Association for Computational Linguistics",
    month = jul,
    year = "2006",
    address = "Sydney, Australia",
    publisher = "Association for Computational Linguistics",
    url = "https://www.aclweb.org/anthology/P06-1033",
    doi = "10.3115/1220175.1220208",
    pages = "257--264",
}
@inproceedings{higashinaka-etal-2006-learning,
    title = "Learning to Generate Naturalistic Utterances Using Reviews in Spoken Dialogue Systems",
    author = "Higashinaka, Ryuichiro  and
      Prasad, Rashmi  and
      Walker, Marilyn A.",
    booktitle = "Proceedings of the 21st International Conference on Computational Linguistics and 44th Annual Meeting of the Association for Computational Linguistics",
    month = jul,
    year = "2006",
    address = "Sydney, Australia",
    publisher = "Association for Computational Linguistics",
    url = "https://www.aclweb.org/anthology/P06-1034",
    doi = "10.3115/1220175.1220209",
    pages = "265--272",
}
@inproceedings{ellison-kirby-2006-measuring,
    title = "Measuring Language Divergence by Intra-Lexical Comparison",
    author = "Ellison, T. Mark  and
      Kirby, Simon",
    booktitle = "Proceedings of the 21st International Conference on Computational Linguistics and 44th Annual Meeting of the Association for Computational Linguistics",
    month = jul,
    year = "2006",
    address = "Sydney, Australia",
    publisher = "Association for Computational Linguistics",
    url = "https://www.aclweb.org/anthology/P06-1035",
    doi = "10.3115/1220175.1220210",
    pages = "273--280",
}
@inproceedings{ferret-zock-2006-enhancing,
    title = "Enhancing Electronic Dictionaries with an Index Based on Associations",
    author = "Ferret, Olivier  and
      Zock, Michael",
    booktitle = "Proceedings of the 21st International Conference on Computational Linguistics and 44th Annual Meeting of the Association for Computational Linguistics",
    month = jul,
    year = "2006",
    address = "Sydney, Australia",
    publisher = "Association for Computational Linguistics",
    url = "https://www.aclweb.org/anthology/P06-1036",
    doi = "10.3115/1220175.1220211",
    pages = "281--288",
}
@inproceedings{foth-etal-2006-guiding,
    title = "Guiding a Constraint Dependency Parser with Supertags",
    author = "Foth, Kilian A.  and
      By, Tomas  and
      Menzel, Wolfgang",
    booktitle = "Proceedings of the 21st International Conference on Computational Linguistics and 44th Annual Meeting of the Association for Computational Linguistics",
    month = jul,
    year = "2006",
    address = "Sydney, Australia",
    publisher = "Association for Computational Linguistics",
    url = "https://www.aclweb.org/anthology/P06-1037",
    doi = "10.3115/1220175.1220212",
    pages = "289--296",
}
@inproceedings{davidov-rappoport-2006-efficient,
    title = "Efficient Unsupervised Discovery of Word Categories Using Symmetric Patterns and High Frequency Words",
    author = "Davidov, Dmitry  and
      Rappoport, Ari",
    booktitle = "Proceedings of the 21st International Conference on Computational Linguistics and 44th Annual Meeting of the Association for Computational Linguistics",
    month = jul,
    year = "2006",
    address = "Sydney, Australia",
    publisher = "Association for Computational Linguistics",
    url = "https://www.aclweb.org/anthology/P06-1038",
    doi = "10.3115/1220175.1220213",
    pages = "297--304",
}
@inproceedings{daume-iii-marcu-2006-bayesian,
    title = "{B}ayesian Query-Focused Summarization",
    author = "Daum{\'e} III, Hal  and
      Marcu, Daniel",
    booktitle = "Proceedings of the 21st International Conference on Computational Linguistics and 44th Annual Meeting of the Association for Computational Linguistics",
    month = jul,
    year = "2006",
    address = "Sydney, Australia",
    publisher = "Association for Computational Linguistics",
    url = "https://www.aclweb.org/anthology/P06-1039",
    doi = "10.3115/1220175.1220214",
    pages = "305--312",
}
@inproceedings{turney-2006-expressing,
    title = "Expressing Implicit Semantic Relations without Supervision",
    author = "Turney, Peter D.",
    booktitle = "Proceedings of the 21st International Conference on Computational Linguistics and 44th Annual Meeting of the Association for Computational Linguistics",
    month = jul,
    year = "2006",
    address = "Sydney, Australia",
    publisher = "Association for Computational Linguistics",
    url = "https://www.aclweb.org/anthology/P06-1040",
    doi = "10.3115/1220175.1220215",
    pages = "313--320",
}
@inproceedings{foth-menzel-2006-hybrid,
    title = "Hybrid Parsing: Using Probabilistic Models as Predictors for a Symbolic Parser",
    author = "Foth, Kilian A.  and
      Menzel, Wolfgang",
    booktitle = "Proceedings of the 21st International Conference on Computational Linguistics and 44th Annual Meeting of the Association for Computational Linguistics",
    month = jul,
    year = "2006",
    address = "Sydney, Australia",
    publisher = "Association for Computational Linguistics",
    url = "https://www.aclweb.org/anthology/P06-1041",
    doi = "10.3115/1220175.1220216",
    pages = "321--328",
}
@inproceedings{sagot-de-la-clergerie-2006-error,
    title = "Error Mining in Parsing Results",
    author = "Sagot, Beno{\^\i}t  and
      de la Clergerie, {\'E}ric",
    booktitle = "Proceedings of the 21st International Conference on Computational Linguistics and 44th Annual Meeting of the Association for Computational Linguistics",
    month = jul,
    year = "2006",
    address = "Sydney, Australia",
    publisher = "Association for Computational Linguistics",
    url = "https://www.aclweb.org/anthology/P06-1042",
    doi = "10.3115/1220175.1220217",
    pages = "329--336",
}
@inproceedings{mcclosky-etal-2006-reranking,
    title = "Reranking and Self-Training for Parser Adaptation",
    author = "McClosky, David  and
      Charniak, Eugene  and
      Johnson, Mark",
    booktitle = "Proceedings of the 21st International Conference on Computational Linguistics and 44th Annual Meeting of the Association for Computational Linguistics",
    month = jul,
    year = "2006",
    address = "Sydney, Australia",
    publisher = "Association for Computational Linguistics",
    url = "https://www.aclweb.org/anthology/P06-1043",
    doi = "10.3115/1220175.1220218",
    pages = "337--344",
}
@inproceedings{korhonen-etal-2006-automatic,
    title = "Automatic Classification of Verbs in Biomedical Texts",
    author = "Korhonen, Anna  and
      Krymolowski, Yuval  and
      Collier, Nigel",
    booktitle = "Proceedings of the 21st International Conference on Computational Linguistics and 44th Annual Meeting of the Association for Computational Linguistics",
    month = jul,
    year = "2006",
    address = "Sydney, Australia",
    publisher = "Association for Computational Linguistics",
    url = "https://www.aclweb.org/anthology/P06-1044",
    doi = "10.3115/1220175.1220219",
    pages = "345--352",
}
@inproceedings{hagiwara-etal-2006-selection,
    title = "Selection of Effective Contextual Information for Automatic Synonym Acquisition",
    author = "Hagiwara, Masato  and
      Ogawa, Yasuhiro  and
      Toyama, Katsuhiko",
    booktitle = "Proceedings of the 21st International Conference on Computational Linguistics and 44th Annual Meeting of the Association for Computational Linguistics",
    month = jul,
    year = "2006",
    address = "Sydney, Australia",
    publisher = "Association for Computational Linguistics",
    url = "https://www.aclweb.org/anthology/P06-1045",
    doi = "10.3115/1220175.1220220",
    pages = "353--360",
}
@inproceedings{gorman-curran-2006-scaling,
    title = "Scaling Distributional Similarity to Large Corpora",
    author = "Gorman, James  and
      Curran, James R.",
    booktitle = "Proceedings of the 21st International Conference on Computational Linguistics and 44th Annual Meeting of the Association for Computational Linguistics",
    month = jul,
    year = "2006",
    address = "Sydney, Australia",
    publisher = "Association for Computational Linguistics",
    url = "https://www.aclweb.org/anthology/P06-1046",
    doi = "10.3115/1220175.1220221",
    pages = "361--368",
}
@inproceedings{li-etal-2006-extractive,
    title = "Extractive Summarization using Inter- and Intra- Event Relevance",
    author = "Li, Wenjie  and
      Wu, Mingli  and
      Lu, Qin  and
      Xu, Wei  and
      Yuan, Chunfa",
    booktitle = "Proceedings of the 21st International Conference on Computational Linguistics and 44th Annual Meeting of the Association for Computational Linguistics",
    month = jul,
    year = "2006",
    address = "Sydney, Australia",
    publisher = "Association for Computational Linguistics",
    url = "https://www.aclweb.org/anthology/P06-1047",
    doi = "10.3115/1220175.1220222",
    pages = "369--376",
}
@inproceedings{clarke-lapata-2006-models,
    title = "Models for Sentence Compression: A Comparison across Domains, Training Requirements and Evaluation Measures",
    author = "Clarke, James  and
      Lapata, Mirella",
    booktitle = "Proceedings of the 21st International Conference on Computational Linguistics and 44th Annual Meeting of the Association for Computational Linguistics",
    month = jul,
    year = "2006",
    address = "Sydney, Australia",
    publisher = "Association for Computational Linguistics",
    url = "https://www.aclweb.org/anthology/P06-1048",
    doi = "10.3115/1220175.1220223",
    pages = "377--384",
}
@inproceedings{bollegala-etal-2006-bottom,
    title = "A Bottom-Up Approach to Sentence Ordering for Multi-Document Summarization",
    author = "Bollegala, Danushka  and
      Okazaki, Naoaki  and
      Ishizuka, Mitsuru",
    booktitle = "Proceedings of the 21st International Conference on Computational Linguistics and 44th Annual Meeting of the Association for Computational Linguistics",
    month = jul,
    year = "2006",
    address = "Sydney, Australia",
    publisher = "Association for Computational Linguistics",
    url = "https://www.aclweb.org/anthology/P06-1049",
    doi = "10.3115/1220175.1220224",
    pages = "385--392",
}
@inproceedings{pan-etal-2006-learning,
    title = "Learning Event Durations from Event Descriptions",
    author = "Pan, Feng  and
      Mulkar, Rutu  and
      Hobbs, Jerry R.",
    booktitle = "Proceedings of the 21st International Conference on Computational Linguistics and 44th Annual Meeting of the Association for Computational Linguistics",
    month = jul,
    year = "2006",
    address = "Sydney, Australia",
    publisher = "Association for Computational Linguistics",
    url = "https://www.aclweb.org/anthology/P06-1050",
    doi = "10.3115/1220175.1220225",
    pages = "393--400",
}
@inproceedings{zanzotto-moschitti-2006-automatic,
    title = "Automatic Learning of Textual Entailments with Cross-Pair Similarities",
    author = "Zanzotto, Fabio Massimo  and
      Moschitti, Alessandro",
    booktitle = "Proceedings of the 21st International Conference on Computational Linguistics and 44th Annual Meeting of the Association for Computational Linguistics",
    month = jul,
    year = "2006",
    address = "Sydney, Australia",
    publisher = "Association for Computational Linguistics",
    url = "https://www.aclweb.org/anthology/P06-1051",
    doi = "10.3115/1220175.1220226",
    pages = "401--408",
}
@inproceedings{koller-thater-2006-improved,
    title = "An Improved Redundancy Elimination Algorithm for Underspecified Representations",
    author = "Koller, Alexander  and
      Thater, Stefan",
    booktitle = "Proceedings of the 21st International Conference on Computational Linguistics and 44th Annual Meeting of the Association for Computational Linguistics",
    month = jul,
    year = "2006",
    address = "Sydney, Australia",
    publisher = "Association for Computational Linguistics",
    url = "https://www.aclweb.org/anthology/P06-1052",
    doi = "10.3115/1220175.1220227",
    pages = "409--416",
}
@inproceedings{dubey-etal-2006-integrating,
    title = "Integrating Syntactic Priming into an Incremental Probabilistic Parser, with an Application to Psycholinguistic Modeling",
    author = "Dubey, Amit  and
      Keller, Frank  and
      Sturt, Patrick",
    booktitle = "Proceedings of the 21st International Conference on Computational Linguistics and 44th Annual Meeting of the Association for Computational Linguistics",
    month = jul,
    year = "2006",
    address = "Sydney, Australia",
    publisher = "Association for Computational Linguistics",
    url = "https://www.aclweb.org/anthology/P06-1053",
    doi = "10.3115/1220175.1220228",
    pages = "417--424",
}
@inproceedings{wang-etal-2006-fast,
    title = "A Fast, Accurate Deterministic Parser for {C}hinese",
    author = "Wang, Mengqiu  and
      Sagae, Kenji  and
      Mitamura, Teruko",
    booktitle = "Proceedings of the 21st International Conference on Computational Linguistics and 44th Annual Meeting of the Association for Computational Linguistics",
    month = jul,
    year = "2006",
    address = "Sydney, Australia",
    publisher = "Association for Computational Linguistics",
    url = "https://www.aclweb.org/anthology/P06-1054",
    doi = "10.3115/1220175.1220229",
    pages = "425--432",
}
@inproceedings{petrov-etal-2006-learning,
    title = "Learning Accurate, Compact, and Interpretable Tree Annotation",
    author = "Petrov, Slav  and
      Barrett, Leon  and
      Thibaux, Romain  and
      Klein, Dan",
    booktitle = "Proceedings of the 21st International Conference on Computational Linguistics and 44th Annual Meeting of the Association for Computational Linguistics",
    month = jul,
    year = "2006",
    address = "Sydney, Australia",
    publisher = "Association for Computational Linguistics",
    url = "https://www.aclweb.org/anthology/P06-1055",
    doi = "10.3115/1220175.1220230",
    pages = "433--440",
}
@inproceedings{frunza-inkpen-2006-semi,
    title = "Semi-Supervised Learning of Partial Cognates Using Bilingual Bootstrapping",
    author = "Frunza, Oana  and
      Inkpen, Diana",
    booktitle = "Proceedings of the 21st International Conference on Computational Linguistics and 44th Annual Meeting of the Association for Computational Linguistics",
    month = jul,
    year = "2006",
    address = "Sydney, Australia",
    publisher = "Association for Computational Linguistics",
    url = "https://www.aclweb.org/anthology/P06-1056",
    doi = "10.3115/1220175.1220231",
    pages = "441--448",
}
@inproceedings{dagan-etal-2006-direct,
    title = "Direct Word Sense Matching for Lexical Substitution",
    author = "Dagan, Ido  and
      Glickman, Oren  and
      Gliozzo, Alfio  and
      Marmorshtein, Efrat  and
      Strapparava, Carlo",
    booktitle = "Proceedings of the 21st International Conference on Computational Linguistics and 44th Annual Meeting of the Association for Computational Linguistics",
    month = jul,
    year = "2006",
    address = "Sydney, Australia",
    publisher = "Association for Computational Linguistics",
    url = "https://www.aclweb.org/anthology/P06-1057",
    doi = "10.3115/1220175.1220232",
    pages = "449--456",
}
@inproceedings{lu-etal-2006-equivalent,
    title = "An Equivalent Pseudoword Solution to {C}hinese Word Sense Disambiguation",
    author = "Lu, Zhimao  and
      Wang, Haifeng  and
      Yao, Jianmin  and
      Liu, Ting  and
      Li, Sheng",
    booktitle = "Proceedings of the 21st International Conference on Computational Linguistics and 44th Annual Meeting of the Association for Computational Linguistics",
    month = jul,
    year = "2006",
    address = "Sydney, Australia",
    publisher = "Association for Computational Linguistics",
    url = "https://www.aclweb.org/anthology/P06-1058",
    doi = "10.3115/1220175.1220233",
    pages = "457--464",
}
@inproceedings{okanohara-etal-2006-improving,
    title = "Improving the Scalability of Semi-{M}arkov Conditional Random Fields for Named Entity Recognition",
    author = "Okanohara, Daisuke  and
      Miyao, Yusuke  and
      Tsuruoka, Yoshimasa  and
      Tsujii, Jun{'}ichi",
    booktitle = "Proceedings of the 21st International Conference on Computational Linguistics and 44th Annual Meeting of the Association for Computational Linguistics",
    month = jul,
    year = "2006",
    address = "Sydney, Australia",
    publisher = "Association for Computational Linguistics",
    url = "https://www.aclweb.org/anthology/P06-1059",
    doi = "10.3115/1220175.1220234",
    pages = "465--472",
}
@inproceedings{florian-etal-2006-factorizing,
    title = "Factorizing Complex Models: A Case Study in Mention Detection",
    author = "Florian, Radu  and
      Jing, Hongyan  and
      Kambhatla, Nanda  and
      Zitouni, Imed",
    booktitle = "Proceedings of the 21st International Conference on Computational Linguistics and 44th Annual Meeting of the Association for Computational Linguistics",
    month = jul,
    year = "2006",
    address = "Sydney, Australia",
    publisher = "Association for Computational Linguistics",
    url = "https://www.aclweb.org/anthology/P06-1060",
    doi = "10.3115/1220175.1220235",
    pages = "473--480",
}
@inproceedings{gu-cercone-2006-segment,
    title = "Segment-Based Hidden {M}arkov Models for Information Extraction",
    author = "Gu, Zhenmei  and
      Cercone, Nick",
    booktitle = "Proceedings of the 21st International Conference on Computational Linguistics and 44th Annual Meeting of the Association for Computational Linguistics",
    month = jul,
    year = "2006",
    address = "Sydney, Australia",
    publisher = "Association for Computational Linguistics",
    url = "https://www.aclweb.org/anthology/P06-1061",
    doi = "10.3115/1220175.1220236",
    pages = "481--488",
}
@inproceedings{shi-etal-2006-dom,
    title = "A {DOM} Tree Alignment Model for Mining Parallel Data from the Web",
    author = "Shi, Lei  and
      Niu, Cheng  and
      Zhou, Ming  and
      Gao, Jianfeng",
    booktitle = "Proceedings of the 21st International Conference on Computational Linguistics and 44th Annual Meeting of the Association for Computational Linguistics",
    month = jul,
    year = "2006",
    address = "Sydney, Australia",
    publisher = "Association for Computational Linguistics",
    url = "https://www.aclweb.org/anthology/P06-1062",
    doi = "10.3115/1220175.1220237",
    pages = "489--496",
}
@inproceedings{judge-etal-2006-questionbank,
    title = "{Q}uestion{B}ank: Creating a Corpus of Parse-Annotated Questions",
    author = "Judge, John  and
      Cahill, Aoife  and
      van Genabith, Josef",
    booktitle = "Proceedings of the 21st International Conference on Computational Linguistics and 44th Annual Meeting of the Association for Computational Linguistics",
    month = jul,
    year = "2006",
    address = "Sydney, Australia",
    publisher = "Association for Computational Linguistics",
    url = "https://www.aclweb.org/anthology/P06-1063",
    doi = "10.3115/1220175.1220238",
    pages = "497--504",
}
@inproceedings{hockenmaier-2006-creating,
    title = "Creating a {CCG}bank and a Wide-Coverage {CCG} Lexicon for {G}erman",
    author = "Hockenmaier, Julia",
    booktitle = "Proceedings of the 21st International Conference on Computational Linguistics and 44th Annual Meeting of the Association for Computational Linguistics",
    month = jul,
    year = "2006",
    address = "Sydney, Australia",
    publisher = "Association for Computational Linguistics",
    url = "https://www.aclweb.org/anthology/P06-1064",
    doi = "10.3115/1220175.1220239",
    pages = "505--512",
}
@inproceedings{moore-etal-2006-improved,
    title = "Improved Discriminative Bilingual Word Alignment",
    author = "Moore, Robert C.  and
      Yih, Wen-tau  and
      Bode, Andreas",
    booktitle = "Proceedings of the 21st International Conference on Computational Linguistics and 44th Annual Meeting of the Association for Computational Linguistics",
    month = jul,
    year = "2006",
    address = "Sydney, Australia",
    publisher = "Association for Computational Linguistics",
    url = "https://www.aclweb.org/anthology/P06-1065",
    doi = "10.3115/1220175.1220240",
    pages = "513--520",
}
@inproceedings{xiong-etal-2006-maximum,
    title = "Maximum Entropy Based Phrase Reordering Model for Statistical Machine Translation",
    author = "Xiong, Deyi  and
      Liu, Qun  and
      Lin, Shouxun",
    booktitle = "Proceedings of the 21st International Conference on Computational Linguistics and 44th Annual Meeting of the Association for Computational Linguistics",
    month = jul,
    year = "2006",
    address = "Sydney, Australia",
    publisher = "Association for Computational Linguistics",
    url = "https://www.aclweb.org/anthology/P06-1066",
    doi = "10.3115/1220175.1220241",
    pages = "521--528",
}
@inproceedings{al-onaizan-papineni-2006-distortion,
    title = "Distortion Models for Statistical Machine Translation",
    author = "Al-Onaizan, Yaser  and
      Papineni, Kishore",
    booktitle = "Proceedings of the 21st International Conference on Computational Linguistics and 44th Annual Meeting of the Association for Computational Linguistics",
    month = jul,
    year = "2006",
    address = "Sydney, Australia",
    publisher = "Association for Computational Linguistics",
    url = "https://www.aclweb.org/anthology/P06-1067",
    doi = "10.3115/1220175.1220242",
    pages = "529--536",
}
@inproceedings{hulth-megyesi-2006-study,
    title = "A Study on Automatically Extracted Keywords in Text Categorization",
    author = "Hulth, Anette  and
      Megyesi, Be{\'a}ta B.",
    booktitle = "Proceedings of the 21st International Conference on Computational Linguistics and 44th Annual Meeting of the Association for Computational Linguistics",
    month = jul,
    year = "2006",
    address = "Sydney, Australia",
    publisher = "Association for Computational Linguistics",
    url = "https://www.aclweb.org/anthology/P06-1068",
    doi = "10.3115/1220175.1220243",
    pages = "537--544",
}
@inproceedings{li-etal-2006-comparison,
    title = "A Comparison and Semi-Quantitative Analysis of Words and Character-Bigrams as Features in {C}hinese Text Categorization",
    author = "Li, Jingyang  and
      Sun, Maosong  and
      Zhang, Xian",
    booktitle = "Proceedings of the 21st International Conference on Computational Linguistics and 44th Annual Meeting of the Association for Computational Linguistics",
    month = jul,
    year = "2006",
    address = "Sydney, Australia",
    publisher = "Association for Computational Linguistics",
    url = "https://www.aclweb.org/anthology/P06-1069",
    doi = "10.3115/1220175.1220244",
    pages = "545--552",
}
@inproceedings{gliozzo-strapparava-2006-exploiting,
    title = "Exploiting Comparable Corpora and Bilingual Dictionaries for Cross-Language Text Categorization",
    author = "Gliozzo, Alfio  and
      Strapparava, Carlo",
    booktitle = "Proceedings of the 21st International Conference on Computational Linguistics and 44th Annual Meeting of the Association for Computational Linguistics",
    month = jul,
    year = "2006",
    address = "Sydney, Australia",
    publisher = "Association for Computational Linguistics",
    url = "https://www.aclweb.org/anthology/P06-1070",
    doi = "10.3115/1220175.1220245",
    pages = "553--560",
}
@inproceedings{zhang-etal-2006-progressive,
    title = "A Progressive Feature Selection Algorithm for Ultra Large Feature Spaces",
    author = "Zhang, Qi  and
      Weng, Fuliang  and
      Feng, Zhe",
    booktitle = "Proceedings of the 21st International Conference on Computational Linguistics and 44th Annual Meeting of the Association for Computational Linguistics",
    month = jul,
    year = "2006",
    address = "Sydney, Australia",
    publisher = "Association for Computational Linguistics",
    url = "https://www.aclweb.org/anthology/P06-1071",
    doi = "10.3115/1220175.1220246",
    pages = "561--568",
}
@inproceedings{smith-eisner-2006-annealing,
    title = "Annealing Structural Bias in Multilingual Weighted Grammar Induction",
    author = "Smith, Noah A.  and
      Eisner, Jason",
    booktitle = "Proceedings of the 21st International Conference on Computational Linguistics and 44th Annual Meeting of the Association for Computational Linguistics",
    month = jul,
    year = "2006",
    address = "Sydney, Australia",
    publisher = "Association for Computational Linguistics",
    url = "https://www.aclweb.org/anthology/P06-1072",
    doi = "10.3115/1220175.1220247",
    pages = "569--576",
}
@inproceedings{zitouni-etal-2006-maximum,
    title = "Maximum Entropy Based Restoration of {A}rabic Diacritics",
    author = "Zitouni, Imed  and
      Sorensen, Jeffrey S.  and
      Sarikaya, Ruhi",
    booktitle = "Proceedings of the 21st International Conference on Computational Linguistics and 44th Annual Meeting of the Association for Computational Linguistics",
    month = jul,
    year = "2006",
    address = "Sydney, Australia",
    publisher = "Association for Computational Linguistics",
    url = "https://www.aclweb.org/anthology/P06-1073",
    doi = "10.3115/1220175.1220248",
    pages = "577--584",
}
@inproceedings{lv-etal-2006-iterative,
    title = "An Iterative Implicit Feedback Approach to Personalized Search",
    author = "Lv, Yuanhua  and
      Sun, Le  and
      Zhang, Junlin  and
      Nie, Jian-Yun  and
      Chen, Wan  and
      Zhang, Wei",
    booktitle = "Proceedings of the 21st International Conference on Computational Linguistics and 44th Annual Meeting of the Association for Computational Linguistics",
    month = jul,
    year = "2006",
    address = "Sydney, Australia",
    publisher = "Association for Computational Linguistics",
    url = "https://www.aclweb.org/anthology/P06-1074",
    doi = "10.3115/1220175.1220249",
    pages = "585--592",
}
@inproceedings{zhu-wang-2006-effect,
    title = "The Effect of Translation Quality in {MT}-Based Cross-Language Information Retrieval",
    author = "Zhu, Jiang  and
      Wang, Haifeng",
    booktitle = "Proceedings of the 21st International Conference on Computational Linguistics and 44th Annual Meeting of the Association for Computational Linguistics",
    month = jul,
    year = "2006",
    address = "Sydney, Australia",
    publisher = "Association for Computational Linguistics",
    url = "https://www.aclweb.org/anthology/P06-1075",
    doi = "10.3115/1220175.1220250",
    pages = "593--600",
}
@inproceedings{blake-2006-comparison,
    title = "A Comparison of Document, Sentence, and Term Event Spaces",
    author = "Blake, Catherine",
    booktitle = "Proceedings of the 21st International Conference on Computational Linguistics and 44th Annual Meeting of the Association for Computational Linguistics",
    month = jul,
    year = "2006",
    address = "Sydney, Australia",
    publisher = "Association for Computational Linguistics",
    url = "https://www.aclweb.org/anthology/P06-1076",
    doi = "10.3115/1220175.1220251",
    pages = "601--608",
}
@inproceedings{liu-etal-2006-tree,
    title = "Tree-to-String Alignment Template for Statistical Machine Translation",
    author = "Liu, Yang  and
      Liu, Qun  and
      Lin, Shouxun",
    booktitle = "Proceedings of the 21st International Conference on Computational Linguistics and 44th Annual Meeting of the Association for Computational Linguistics",
    month = jul,
    year = "2006",
    address = "Sydney, Australia",
    publisher = "Association for Computational Linguistics",
    url = "https://www.aclweb.org/anthology/P06-1077",
    doi = "10.3115/1220175.1220252",
    pages = "609--616",
}
@inproceedings{sudoh-etal-2006-incorporating,
    title = "Incorporating Speech Recognition Confidence into Discriminative Named Entity Recognition of Speech Data",
    author = "Sudoh, Katsuhito  and
      Tsukada, Hajime  and
      Isozaki, Hideki",
    booktitle = "Proceedings of the 21st International Conference on Computational Linguistics and 44th Annual Meeting of the Association for Computational Linguistics",
    month = jul,
    year = "2006",
    address = "Sydney, Australia",
    publisher = "Association for Computational Linguistics",
    url = "https://www.aclweb.org/anthology/P06-1078",
    doi = "10.3115/1220175.1220253",
    pages = "617--624",
}
@inproceedings{iida-etal-2006-exploiting,
    title = "Exploiting Syntactic Patterns as Clues in Zero-Anaphora Resolution",
    author = "Iida, Ryu  and
      Inui, Kentaro  and
      Matsumoto, Yuji",
    booktitle = "Proceedings of the 21st International Conference on Computational Linguistics and 44th Annual Meeting of the Association for Computational Linguistics",
    month = jul,
    year = "2006",
    address = "Sydney, Australia",
    publisher = "Association for Computational Linguistics",
    url = "https://www.aclweb.org/anthology/P06-1079",
    doi = "10.3115/1220175.1220254",
    pages = "625--632",
}
@inproceedings{park-etal-2006-self,
    title = "Self-Organizing n-gram Model for Automatic Word Spacing",
    author = "Park, Seong-Bae  and
      Tae, Yoon-Shik  and
      Park, Se-Young",
    booktitle = "Proceedings of the 21st International Conference on Computational Linguistics and 44th Annual Meeting of the Association for Computational Linguistics",
    month = jul,
    year = "2006",
    address = "Sydney, Australia",
    publisher = "Association for Computational Linguistics",
    url = "https://www.aclweb.org/anthology/P06-1080",
    doi = "10.3115/1220175.1220255",
    pages = "633--640",
}
@inproceedings{li-etal-2006-concept,
    title = "Concept Unification of Terms in Different Languages for {IR}",
    author = "Li, Qing  and
      Myaeng, Sung-Hyon  and
      Jin, Yun  and
      Kang, Bo-yeong",
    booktitle = "Proceedings of the 21st International Conference on Computational Linguistics and 44th Annual Meeting of the Association for Computational Linguistics",
    month = jul,
    year = "2006",
    address = "Sydney, Australia",
    publisher = "Association for Computational Linguistics",
    url = "https://www.aclweb.org/anthology/P06-1081",
    doi = "10.3115/1220175.1220256",
    pages = "641--648",
}
@inproceedings{chatterjee-agrawal-2006-word,
    title = "Word Alignment in {E}nglish-{H}indi Parallel Corpus Using Recency-Vector Approach: Some Studies",
    author = "Chatterjee, Niladri  and
      Agrawal, Saumya",
    booktitle = "Proceedings of the 21st International Conference on Computational Linguistics and 44th Annual Meeting of the Association for Computational Linguistics",
    month = jul,
    year = "2006",
    address = "Sydney, Australia",
    publisher = "Association for Computational Linguistics",
    url = "https://www.aclweb.org/anthology/P06-1082",
    doi = "10.3115/1220175.1220257",
    pages = "649--656",
}
@inproceedings{khaltar-etal-2006-extracting,
    title = "Extracting Loanwords from {M}ongolian Corpora and Producing a {J}apanese-{M}ongolian Bilingual Dictionary",
    author = "Khaltar, Badam-Osor  and
      Fujii, Atsushi  and
      Ishikawa, Tetsuya",
    booktitle = "Proceedings of the 21st International Conference on Computational Linguistics and 44th Annual Meeting of the Association for Computational Linguistics",
    month = jul,
    year = "2006",
    address = "Sydney, Australia",
    publisher = "Association for Computational Linguistics",
    url = "https://www.aclweb.org/anthology/P06-1083",
    doi = "10.3115/1220175.1220258",
    pages = "657--664",
}
@inproceedings{adler-elhadad-2006-unsupervised,
    title = "An Unsupervised Morpheme-Based {HMM} for {H}ebrew Morphological Disambiguation",
    author = "Adler, Meni  and
      Elhadad, Michael",
    booktitle = "Proceedings of the 21st International Conference on Computational Linguistics and 44th Annual Meeting of the Association for Computational Linguistics",
    month = jul,
    year = "2006",
    address = "Sydney, Australia",
    publisher = "Association for Computational Linguistics",
    url = "https://www.aclweb.org/anthology/P06-1084",
    doi = "10.3115/1220175.1220259",
    pages = "665--672",
}
@inproceedings{goldwater-etal-2006-contextual,
    title = "Contextual Dependencies in Unsupervised Word Segmentation",
    author = "Goldwater, Sharon  and
      Griffiths, Thomas L.  and
      Johnson, Mark",
    booktitle = "Proceedings of the 21st International Conference on Computational Linguistics and 44th Annual Meeting of the Association for Computational Linguistics",
    month = jul,
    year = "2006",
    address = "Sydney, Australia",
    publisher = "Association for Computational Linguistics",
    url = "https://www.aclweb.org/anthology/P06-1085",
    doi = "10.3115/1220175.1220260",
    pages = "673--680",
}
@inproceedings{habash-rambow-2006-magead,
    title = "{MAGEAD}: A Morphological Analyzer and Generator for the {A}rabic Dialects",
    author = "Habash, Nizar  and
      Rambow, Owen",
    booktitle = "Proceedings of the 21st International Conference on Computational Linguistics and 44th Annual Meeting of the Association for Computational Linguistics",
    month = jul,
    year = "2006",
    address = "Sydney, Australia",
    publisher = "Association for Computational Linguistics",
    url = "https://www.aclweb.org/anthology/P06-1086",
    doi = "10.3115/1220175.1220261",
    pages = "681--688",
}
@inproceedings{goldberg-etal-2006-noun,
    title = "Noun Phrase Chunking in {H}ebrew: Influence of Lexical and Morphological Features",
    author = "Goldberg, Yoav  and
      Adler, Meni  and
      Elhadad, Michael",
    booktitle = "Proceedings of the 21st International Conference on Computational Linguistics and 44th Annual Meeting of the Association for Computational Linguistics",
    month = jul,
    year = "2006",
    address = "Sydney, Australia",
    publisher = "Association for Computational Linguistics",
    url = "https://www.aclweb.org/anthology/P06-1087",
    doi = "10.3115/1220175.1220262",
    pages = "689--696",
}
@inproceedings{curran-etal-2006-multi,
    title = "Multi-Tagging for Lexicalized-Grammar Parsing",
    author = "Curran, James R.  and
      Clark, Stephen  and
      Vadas, David",
    booktitle = "Proceedings of the 21st International Conference on Computational Linguistics and 44th Annual Meeting of the Association for Computational Linguistics",
    month = jul,
    year = "2006",
    address = "Sydney, Australia",
    publisher = "Association for Computational Linguistics",
    url = "https://www.aclweb.org/anthology/P06-1088",
    doi = "10.3115/1220175.1220263",
    pages = "697--704",
}
@inproceedings{nakagawa-matsumoto-2006-guessing,
    title = "Guessing Parts-of-Speech of Unknown Words Using Global Information",
    author = "Nakagawa, Tetsuji  and
      Matsumoto, Yuji",
    booktitle = "Proceedings of the 21st International Conference on Computational Linguistics and 44th Annual Meeting of the Association for Computational Linguistics",
    month = jul,
    year = "2006",
    address = "Sydney, Australia",
    publisher = "Association for Computational Linguistics",
    url = "https://www.aclweb.org/anthology/P06-1089",
    doi = "10.3115/1220175.1220264",
    pages = "705--712",
}
@inproceedings{nagata-etal-2006-clustered,
    title = "A Clustered Global Phrase Reordering Model for Statistical Machine Translation",
    author = "Nagata, Masaaki  and
      Saito, Kuniko  and
      Yamamoto, Kazuhide  and
      Ohashi, Kazuteru",
    booktitle = "Proceedings of the 21st International Conference on Computational Linguistics and 44th Annual Meeting of the Association for Computational Linguistics",
    month = jul,
    year = "2006",
    address = "Sydney, Australia",
    publisher = "Association for Computational Linguistics",
    url = "https://www.aclweb.org/anthology/P06-1090",
    doi = "10.3115/1220175.1220265",
    pages = "713--720",
}
@inproceedings{tillmann-zhang-2006-discriminative,
    title = "A Discriminative Global Training Algorithm for Statistical {MT}",
    author = "Tillmann, Christoph  and
      Zhang, Tong",
    booktitle = "Proceedings of the 21st International Conference on Computational Linguistics and 44th Annual Meeting of the Association for Computational Linguistics",
    month = jul,
    year = "2006",
    address = "Sydney, Australia",
    publisher = "Association for Computational Linguistics",
    url = "https://www.aclweb.org/anthology/P06-1091",
    doi = "10.3115/1220175.1220266",
    pages = "721--728",
}
@inproceedings{mori-etal-2006-phoneme,
    title = "Phoneme-to-Text Transcription System with an Infinite Vocabulary",
    author = "Mori, Shinsuke  and
      Takuma, Daisuke  and
      Kurata, Gakuto",
    booktitle = "Proceedings of the 21st International Conference on Computational Linguistics and 44th Annual Meeting of the Association for Computational Linguistics",
    month = jul,
    year = "2006",
    address = "Sydney, Australia",
    publisher = "Association for Computational Linguistics",
    url = "https://www.aclweb.org/anthology/P06-1092",
    doi = "10.3115/1220175.1220267",
    pages = "729--736",
}
@inproceedings{roy-subramaniam-2006-automatic,
    title = "Automatic Generation of Domain Models for Call-Centers from Noisy Transcriptions",
    author = "Roy, Shourya  and
      Subramaniam, L Venkata",
    booktitle = "Proceedings of the 21st International Conference on Computational Linguistics and 44th Annual Meeting of the Association for Computational Linguistics",
    month = jul,
    year = "2006",
    address = "Sydney, Australia",
    publisher = "Association for Computational Linguistics",
    url = "https://www.aclweb.org/anthology/P06-1093",
    doi = "10.3115/1220175.1220268",
    pages = "737--744",
}
@inproceedings{kelleher-etal-2006-proximity,
    title = "Proximity in Context: An Empirically Grounded Computational Model of Proximity for Processing Topological Spatial Expressions",
    author = "Kelleher, John D.  and
      Kruijff, Geert-Jan M.  and
      Costello, Fintan J.",
    booktitle = "Proceedings of the 21st International Conference on Computational Linguistics and 44th Annual Meeting of the Association for Computational Linguistics",
    month = jul,
    year = "2006",
    address = "Sydney, Australia",
    publisher = "Association for Computational Linguistics",
    url = "https://www.aclweb.org/anthology/P06-1094",
    doi = "10.3115/1220175.1220269",
    pages = "745--752",
}
@inproceedings{mani-etal-2006-machine,
    title = "Machine Learning of Temporal Relations",
    author = "Mani, Inderjeet  and
      Verhagen, Marc  and
      Wellner, Ben  and
      Lee, Chong Min  and
      Pustejovsky, James",
    booktitle = "Proceedings of the 21st International Conference on Computational Linguistics and 44th Annual Meeting of the Association for Computational Linguistics",
    month = jul,
    year = "2006",
    address = "Sydney, Australia",
    publisher = "Association for Computational Linguistics",
    url = "https://www.aclweb.org/anthology/P06-1095",
    doi = "10.3115/1220175.1220270",
    pages = "753--760",
}
@inproceedings{liang-etal-2006-end,
    title = "An End-to-End Discriminative Approach to Machine Translation",
    author = "Liang, Percy  and
      Bouchard-C{\^o}t{\'e}, Alexandre  and
      Klein, Dan  and
      Taskar, Ben",
    booktitle = "Proceedings of the 21st International Conference on Computational Linguistics and 44th Annual Meeting of the Association for Computational Linguistics",
    month = jul,
    year = "2006",
    address = "Sydney, Australia",
    publisher = "Association for Computational Linguistics",
    url = "https://www.aclweb.org/anthology/P06-1096",
    doi = "10.3115/1220175.1220271",
    pages = "761--768",
}
@inproceedings{fraser-marcu-2006-semi,
    title = "Semi-Supervised Training for Statistical Word Alignment",
    author = "Fraser, Alexander  and
      Marcu, Daniel",
    booktitle = "Proceedings of the 21st International Conference on Computational Linguistics and 44th Annual Meeting of the Association for Computational Linguistics",
    month = jul,
    year = "2006",
    address = "Sydney, Australia",
    publisher = "Association for Computational Linguistics",
    url = "https://www.aclweb.org/anthology/P06-1097",
    doi = "10.3115/1220175.1220272",
    pages = "769--776",
}
@inproceedings{watanabe-etal-2006-left,
    title = "Left-to-Right Target Generation for Hierarchical Phrase-Based Translation",
    author = "Watanabe, Taro  and
      Tsukada, Hajime  and
      Isozaki, Hideki",
    booktitle = "Proceedings of the 21st International Conference on Computational Linguistics and 44th Annual Meeting of the Association for Computational Linguistics",
    month = jul,
    year = "2006",
    address = "Sydney, Australia",
    publisher = "Association for Computational Linguistics",
    url = "https://www.aclweb.org/anthology/P06-1098",
    doi = "10.3115/1220175.1220273",
    pages = "777--784",
}
@inproceedings{wermter-hahn-2006-cant,
    title = "You Can{'}t Beat Frequency (Unless You Use Linguistic Knowledge) {--} A Qualitative Evaluation of Association Measures for Collocation and Term Extraction",
    author = "Wermter, Joachim  and
      Hahn, Udo",
    booktitle = "Proceedings of the 21st International Conference on Computational Linguistics and 44th Annual Meeting of the Association for Computational Linguistics",
    month = jul,
    year = "2006",
    address = "Sydney, Australia",
    publisher = "Association for Computational Linguistics",
    url = "https://www.aclweb.org/anthology/P06-1099",
    doi = "10.3115/1220175.1220274",
    pages = "785--792",
}
@inproceedings{pennacchiotti-pantel-2006-ontologizing,
    title = "Ontologizing Semantic Relations",
    author = "Pennacchiotti, Marco  and
      Pantel, Patrick",
    booktitle = "Proceedings of the 21st International Conference on Computational Linguistics and 44th Annual Meeting of the Association for Computational Linguistics",
    month = jul,
    year = "2006",
    address = "Sydney, Australia",
    publisher = "Association for Computational Linguistics",
    url = "https://www.aclweb.org/anthology/P06-1100",
    doi = "10.3115/1220175.1220275",
    pages = "793--800",
}
@inproceedings{snow-etal-2006-semantic,
    title = "Semantic Taxonomy Induction from Heterogenous Evidence",
    author = "Snow, Rion  and
      Jurafsky, Daniel  and
      Ng, Andrew Y.",
    booktitle = "Proceedings of the 21st International Conference on Computational Linguistics and 44th Annual Meeting of the Association for Computational Linguistics",
    month = jul,
    year = "2006",
    address = "Sydney, Australia",
    publisher = "Association for Computational Linguistics",
    url = "https://www.aclweb.org/anthology/P06-1101",
    doi = "10.3115/1220175.1220276",
    pages = "801--808",
}
@inproceedings{pasca-etal-2006-names,
    title = "Names and Similarities on the Web: Fact Extraction in the Fast Lane",
    author = "Pa{\c{s}}ca, Marius  and
      Lin, Dekang  and
      Bigham, Jeffrey  and
      Lifchits, Andrei  and
      Jain, Alpa",
    booktitle = "Proceedings of the 21st International Conference on Computational Linguistics and 44th Annual Meeting of the Association for Computational Linguistics",
    month = jul,
    year = "2006",
    address = "Sydney, Australia",
    publisher = "Association for Computational Linguistics",
    url = "https://www.aclweb.org/anthology/P06-1102",
    doi = "10.3115/1220175.1220277",
    pages = "809--816",
}
@inproceedings{klementiev-roth-2006-weakly,
    title = "Weakly Supervised Named Entity Transliteration and Discovery from Multilingual Comparable Corpora",
    author = "Klementiev, Alexandre  and
      Roth, Dan",
    booktitle = "Proceedings of the 21st International Conference on Computational Linguistics and 44th Annual Meeting of the Association for Computational Linguistics",
    month = jul,
    year = "2006",
    address = "Sydney, Australia",
    publisher = "Association for Computational Linguistics",
    url = "https://www.aclweb.org/anthology/P06-1103",
    doi = "10.3115/1220175.1220278",
    pages = "817--824",
}
@inproceedings{zhang-etal-2006-composite,
    title = "A Composite Kernel to Extract Relations between Entities with Both Flat and Structured Features",
    author = "Zhang, Min  and
      Zhang, Jie  and
      Su, Jian  and
      Zhou, GuoDong",
    booktitle = "Proceedings of the 21st International Conference on Computational Linguistics and 44th Annual Meeting of the Association for Computational Linguistics",
    month = jul,
    year = "2006",
    address = "Sydney, Australia",
    publisher = "Association for Computational Linguistics",
    url = "https://www.aclweb.org/anthology/P06-1104",
    doi = "10.3115/1220175.1220279",
    pages = "825--832",
}
@inproceedings{abekawa-okumura-2006-japanese,
    title = "{J}apanese Dependency Parsing Using Co-Occurrence Information and a Combination of Case Elements",
    author = "Abekawa, Takeshi  and
      Okumura, Manabu",
    booktitle = "Proceedings of the 21st International Conference on Computational Linguistics and 44th Annual Meeting of the Association for Computational Linguistics",
    month = jul,
    year = "2006",
    address = "Sydney, Australia",
    publisher = "Association for Computational Linguistics",
    url = "https://www.aclweb.org/anthology/P06-1105",
    doi = "10.3115/1220175.1220280",
    pages = "833--840",
}
@inproceedings{demner-fushman-lin-2006-answer,
    title = "Answer Extraction, Semantic Clustering, and Extractive Summarization for Clinical Question Answering",
    author = "Demner-Fushman, Dina  and
      Lin, Jimmy",
    booktitle = "Proceedings of the 21st International Conference on Computational Linguistics and 44th Annual Meeting of the Association for Computational Linguistics",
    month = jul,
    year = "2006",
    address = "Sydney, Australia",
    publisher = "Association for Computational Linguistics",
    url = "https://www.aclweb.org/anthology/P06-1106",
    doi = "10.3115/1220175.1220281",
    pages = "841--848",
}
@inproceedings{zanzotto-etal-2006-discovering,
    title = "Discovering Asymmetric Entailment Relations between Verbs Using Selectional Preferences",
    author = "Zanzotto, Fabio Massimo  and
      Pennacchiotti, Marco  and
      Pazienza, Maria Teresa",
    booktitle = "Proceedings of the 21st International Conference on Computational Linguistics and 44th Annual Meeting of the Association for Computational Linguistics",
    month = jul,
    year = "2006",
    address = "Sydney, Australia",
    publisher = "Association for Computational Linguistics",
    url = "https://www.aclweb.org/anthology/P06-1107",
    doi = "10.3115/1220175.1220282",
    pages = "849--856",
}
@inproceedings{halpin-moore-2006-event,
    title = "Event Extraction in a Plot Advice Agent",
    author = "Halpin, Harry  and
      Moore, Johanna D.",
    booktitle = "Proceedings of the 21st International Conference on Computational Linguistics and 44th Annual Meeting of the Association for Computational Linguistics",
    month = jul,
    year = "2006",
    address = "Sydney, Australia",
    publisher = "Association for Computational Linguistics",
    url = "https://www.aclweb.org/anthology/P06-1108",
    doi = "10.3115/1220175.1220283",
    pages = "857--864",
}
@inproceedings{bod-2006-subtrees,
    title = "An All-Subtrees Approach to Unsupervised Parsing",
    author = "Bod, Rens",
    booktitle = "Proceedings of the 21st International Conference on Computational Linguistics and 44th Annual Meeting of the Association for Computational Linguistics",
    month = jul,
    year = "2006",
    address = "Sydney, Australia",
    publisher = "Association for Computational Linguistics",
    url = "https://www.aclweb.org/anthology/P06-1109",
    doi = "10.3115/1220175.1220284",
    pages = "865--872",
}
@inproceedings{turian-melamed-2006-advances,
    title = "Advances in Discriminative Parsing",
    author = "Turian, Joseph  and
      Melamed, I. Dan",
    booktitle = "Proceedings of the 21st International Conference on Computational Linguistics and 44th Annual Meeting of the Association for Computational Linguistics",
    month = jul,
    year = "2006",
    address = "Sydney, Australia",
    publisher = "Association for Computational Linguistics",
    url = "https://www.aclweb.org/anthology/P06-1110",
    doi = "10.3115/1220175.1220285",
    pages = "873--880",
}
@inproceedings{haghighi-klein-2006-prototype,
    title = "Prototype-Driven Grammar Induction",
    author = "Haghighi, Aria  and
      Klein, Dan",
    booktitle = "Proceedings of the 21st International Conference on Computational Linguistics and 44th Annual Meeting of the Association for Computational Linguistics",
    month = jul,
    year = "2006",
    address = "Sydney, Australia",
    publisher = "Association for Computational Linguistics",
    url = "https://www.aclweb.org/anthology/P06-1111",
    doi = "10.3115/1220175.1220286",
    pages = "881--888",
}
@inproceedings{shen-klakow-2006-exploring,
    title = "Exploring Correlation of Dependency Relation Paths for Answer Extraction",
    author = "Shen, Dan  and
      Klakow, Dietrich",
    booktitle = "Proceedings of the 21st International Conference on Computational Linguistics and 44th Annual Meeting of the Association for Computational Linguistics",
    month = jul,
    year = "2006",
    address = "Sydney, Australia",
    publisher = "Association for Computational Linguistics",
    url = "https://www.aclweb.org/anthology/P06-1112",
    doi = "10.3115/1220175.1220287",
    pages = "889--896",
}
@inproceedings{novischi-moldovan-2006-question,
    title = "Question Answering with Lexical Chains Propagating Verb Arguments",
    author = "Novischi, Adrian  and
      Moldovan, Dan",
    booktitle = "Proceedings of the 21st International Conference on Computational Linguistics and 44th Annual Meeting of the Association for Computational Linguistics",
    month = jul,
    year = "2006",
    address = "Sydney, Australia",
    publisher = "Association for Computational Linguistics",
    url = "https://www.aclweb.org/anthology/P06-1113",
    doi = "10.3115/1220175.1220288",
    pages = "897--904",
}
@inproceedings{harabagiu-hickl-2006-methods,
    title = "Methods for Using Textual Entailment in Open-Domain Question Answering",
    author = "Harabagiu, Sanda  and
      Hickl, Andrew",
    booktitle = "Proceedings of the 21st International Conference on Computational Linguistics and 44th Annual Meeting of the Association for Computational Linguistics",
    month = jul,
    year = "2006",
    address = "Sydney, Australia",
    publisher = "Association for Computational Linguistics",
    url = "https://www.aclweb.org/anthology/P06-1114",
    doi = "10.3115/1220175.1220289",
    pages = "905--912",
}
@inproceedings{kate-mooney-2006-using,
    title = "Using String-Kernels for Learning Semantic Parsers",
    author = "Kate, Rohit J.  and
      Mooney, Raymond J.",
    booktitle = "Proceedings of the 21st International Conference on Computational Linguistics and 44th Annual Meeting of the Association for Computational Linguistics",
    month = jul,
    year = "2006",
    address = "Sydney, Australia",
    publisher = "Association for Computational Linguistics",
    url = "https://www.aclweb.org/anthology/P06-1115",
    doi = "10.3115/1220175.1220290",
    pages = "913--920",
}
@inproceedings{abdalla-teufel-2006-bootstrapping,
    title = "A Bootstrapping Approach to Unsupervised Detection of Cue Phrase Variants",
    author = "Abdalla, Rashid M.  and
      Teufel, Simone",
    booktitle = "Proceedings of the 21st International Conference on Computational Linguistics and 44th Annual Meeting of the Association for Computational Linguistics",
    month = jul,
    year = "2006",
    address = "Sydney, Australia",
    publisher = "Association for Computational Linguistics",
    url = "https://www.aclweb.org/anthology/P06-1116",
    doi = "10.3115/1220175.1220291",
    pages = "921--928",
}
@inproceedings{giuglea-moschitti-2006-semantic,
    title = "Semantic Role Labeling via {F}rame{N}et, {V}erb{N}et and {P}rop{B}ank",
    author = "Giuglea, Ana-Maria  and
      Moschitti, Alessandro",
    booktitle = "Proceedings of the 21st International Conference on Computational Linguistics and 44th Annual Meeting of the Association for Computational Linguistics",
    month = jul,
    year = "2006",
    address = "Sydney, Australia",
    publisher = "Association for Computational Linguistics",
    url = "https://www.aclweb.org/anthology/P06-1117",
    doi = "10.3115/1220175.1220292",
    pages = "929--936",
}
@inproceedings{serasset-etal-2006-multilingual,
    title = "Multilingual Legal Terminology on the Jibiki Platform: The {L}ex{ALP} Project",
    author = "S{\'e}rasset, Gilles  and
      Brunet-Manquat, Francis  and
      Chiocchetti, Elena",
    booktitle = "Proceedings of the 21st International Conference on Computational Linguistics and 44th Annual Meeting of the Association for Computational Linguistics",
    month = jul,
    year = "2006",
    address = "Sydney, Australia",
    publisher = "Association for Computational Linguistics",
    url = "https://www.aclweb.org/anthology/P06-1118",
    doi = "10.3115/1220175.1220293",
    pages = "937--944",
}
@inproceedings{murray-etal-2006-leveraging,
    title = "Leveraging Reusability: Cost-Effective Lexical Acquisition for Large-Scale Ontology Translation",
    author = "Murray, G. Craig  and
      Dorr, Bonnie J.  and
      Lin, Jimmy  and
      Haji{\v{c}}, Jan  and
      Pecina, Pavel",
    booktitle = "Proceedings of the 21st International Conference on Computational Linguistics and 44th Annual Meeting of the Association for Computational Linguistics",
    month = jul,
    year = "2006",
    address = "Sydney, Australia",
    publisher = "Association for Computational Linguistics",
    url = "https://www.aclweb.org/anthology/P06-1119",
    doi = "10.3115/1220175.1220294",
    pages = "945--952",
}
@inproceedings{seretan-wehrli-2006-accurate,
    title = "Accurate Collocation Extraction Using a Multilingual Parser",
    author = "Seretan, Violeta  and
      Wehrli, Eric",
    booktitle = "Proceedings of the 21st International Conference on Computational Linguistics and 44th Annual Meeting of the Association for Computational Linguistics",
    month = jul,
    year = "2006",
    address = "Sydney, Australia",
    publisher = "Association for Computational Linguistics",
    url = "https://www.aclweb.org/anthology/P06-1120",
    doi = "10.3115/1220175.1220295",
    pages = "953--960",
}
@inproceedings{galley-etal-2006-scalable,
    title = "Scalable Inference and Training of Context-Rich Syntactic Translation Models",
    author = "Galley, Michel  and
      Graehl, Jonathan  and
      Knight, Kevin  and
      Marcu, Daniel  and
      DeNeefe, Steve  and
      Wang, Wei  and
      Thayer, Ignacio",
    booktitle = "Proceedings of the 21st International Conference on Computational Linguistics and 44th Annual Meeting of the Association for Computational Linguistics",
    month = jul,
    year = "2006",
    address = "Sydney, Australia",
    publisher = "Association for Computational Linguistics",
    url = "https://www.aclweb.org/anthology/P06-1121",
    doi = "10.3115/1220175.1220296",
    pages = "961--968",
}
@inproceedings{talbot-osborne-2006-modelling,
    title = "Modelling Lexical Redundancy for Machine Translation",
    author = "Talbot, David  and
      Osborne, Miles",
    booktitle = "Proceedings of the 21st International Conference on Computational Linguistics and 44th Annual Meeting of the Association for Computational Linguistics",
    month = jul,
    year = "2006",
    address = "Sydney, Australia",
    publisher = "Association for Computational Linguistics",
    url = "https://www.aclweb.org/anthology/P06-1122",
    doi = "10.3115/1220175.1220297",
    pages = "969--976",
}
@inproceedings{wellington-etal-2006-empirical,
    title = "Empirical Lower Bounds on the Complexity of Translational Equivalence",
    author = "Wellington, Benjamin  and
      Waxmonsky, Sonjia  and
      Melamed, I. Dan",
    booktitle = "Proceedings of the 21st International Conference on Computational Linguistics and 44th Annual Meeting of the Association for Computational Linguistics",
    month = jul,
    year = "2006",
    address = "Sydney, Australia",
    publisher = "Association for Computational Linguistics",
    url = "https://www.aclweb.org/anthology/P06-1123",
    doi = "10.3115/1220175.1220298",
    pages = "977--984",
}
@inproceedings{teh-2006-hierarchical,
    title = "A Hierarchical {B}ayesian Language Model Based On Pitman-Yor Processes",
    author = "Teh, Yee Whye",
    booktitle = "Proceedings of the 21st International Conference on Computational Linguistics and 44th Annual Meeting of the Association for Computational Linguistics",
    month = jul,
    year = "2006",
    address = "Sydney, Australia",
    publisher = "Association for Computational Linguistics",
    url = "https://www.aclweb.org/anthology/P06-1124",
    doi = "10.3115/1220175.1220299",
    pages = "985--992",
}
@inproceedings{xia-etal-2006-phonetic,
    title = "A Phonetic-Based Approach to {C}hinese Chat Text Normalization",
    author = "Xia, Yunqing  and
      Wong, Kam-Fai  and
      Li, Wenjie",
    booktitle = "Proceedings of the 21st International Conference on Computational Linguistics and 44th Annual Meeting of the Association for Computational Linguistics",
    month = jul,
    year = "2006",
    address = "Sydney, Australia",
    publisher = "Association for Computational Linguistics",
    url = "https://www.aclweb.org/anthology/P06-1125",
    doi = "10.3115/1220175.1220300",
    pages = "993--1000",
}
@inproceedings{li-etal-2006-discriminative,
    title = "Discriminative Pruning of Language Models for {C}hinese Word Segmentation",
    author = "Li, Jianfeng  and
      Wang, Haifeng  and
      Ren, Dengjun  and
      Li, Guohua",
    booktitle = "Proceedings of the 21st International Conference on Computational Linguistics and 44th Annual Meeting of the Association for Computational Linguistics",
    month = jul,
    year = "2006",
    address = "Sydney, Australia",
    publisher = "Association for Computational Linguistics",
    url = "https://www.aclweb.org/anthology/P06-1126",
    doi = "10.3115/1220175.1220301",
    pages = "1001--1008",
}
@inproceedings{chen-etal-2006-novel,
    title = "Novel Association Measures Using Web Search with Double Checking",
    author = "Chen, Hsin-Hsi  and
      Lin, Ming-Shun  and
      Wei, Yu-Chuan",
    booktitle = "Proceedings of the 21st International Conference on Computational Linguistics and 44th Annual Meeting of the Association for Computational Linguistics",
    month = jul,
    year = "2006",
    address = "Sydney, Australia",
    publisher = "Association for Computational Linguistics",
    url = "https://www.aclweb.org/anthology/P06-1127",
    doi = "10.3115/1220175.1220302",
    pages = "1009--1016",
}
@inproceedings{miyao-etal-2006-semantic,
    title = "Semantic Retrieval for the Accurate Identification of Relational Concepts in Massive Textbases",
    author = "Miyao, Yusuke  and
      Ohta, Tomoko  and
      Masuda, Katsuya  and
      Tsuruoka, Yoshimasa  and
      Yoshida, Kazuhiro  and
      Ninomiya, Takashi  and
      Tsujii, Jun{'}ichi",
    booktitle = "Proceedings of the 21st International Conference on Computational Linguistics and 44th Annual Meeting of the Association for Computational Linguistics",
    month = jul,
    year = "2006",
    address = "Sydney, Australia",
    publisher = "Association for Computational Linguistics",
    url = "https://www.aclweb.org/anthology/P06-1128",
    doi = "10.3115/1220175.1220303",
    pages = "1017--1024",
}
@inproceedings{li-etal-2006-exploring,
    title = "Exploring Distributional Similarity Based Models for Query Spelling Correction",
    author = "Li, Mu  and
      Zhu, Muhua  and
      Zhang, Yang  and
      Zhou, Ming",
    booktitle = "Proceedings of the 21st International Conference on Computational Linguistics and 44th Annual Meeting of the Association for Computational Linguistics",
    month = jul,
    year = "2006",
    address = "Sydney, Australia",
    publisher = "Association for Computational Linguistics",
    url = "https://www.aclweb.org/anthology/P06-1129",
    doi = "10.3115/1220175.1220304",
    pages = "1025--1032",
}
@inproceedings{cahill-van-genabith-2006-robust,
    title = "Robust {PCFG}-Based Generation Using Automatically Acquired {LFG} Approximations",
    author = "Cahill, Aoife  and
      van Genabith, Josef",
    booktitle = "Proceedings of the 21st International Conference on Computational Linguistics and 44th Annual Meeting of the Association for Computational Linguistics",
    month = jul,
    year = "2006",
    address = "Sydney, Australia",
    publisher = "Association for Computational Linguistics",
    url = "https://www.aclweb.org/anthology/P06-1130",
    doi = "10.3115/1220175.1220305",
    pages = "1033--1040",
}
@inproceedings{kelleher-kruijff-2006-incremental,
    title = "Incremental Generation of Spatial Referring Expressions in Situated Dialog",
    author = "Kelleher, John D.  and
      Kruijff, Geert-Jan M.",
    booktitle = "Proceedings of the 21st International Conference on Computational Linguistics and 44th Annual Meeting of the Association for Computational Linguistics",
    month = jul,
    year = "2006",
    address = "Sydney, Australia",
    publisher = "Association for Computational Linguistics",
    url = "https://www.aclweb.org/anthology/P06-1131",
    doi = "10.3115/1220175.1220306",
    pages = "1041--1048",
}
@inproceedings{suzuki-toutanova-2006-learning,
    title = "Learning to Predict Case Markers in {J}apanese",
    author = "Suzuki, Hisami  and
      Toutanova, Kristina",
    booktitle = "Proceedings of the 21st International Conference on Computational Linguistics and 44th Annual Meeting of the Association for Computational Linguistics",
    month = jul,
    year = "2006",
    address = "Sydney, Australia",
    publisher = "Association for Computational Linguistics",
    url = "https://www.aclweb.org/anthology/P06-1132",
    doi = "10.3115/1220175.1220307",
    pages = "1049--1056",
}
@inproceedings{lin-hauptmann-2006-documents,
    title = "Are These Documents Written from Different Perspectives? A Test of Different Perspectives Based on Statistical Distribution Divergence",
    author = "Lin, Wei-Hao  and
      Hauptmann, Alexander",
    booktitle = "Proceedings of the 21st International Conference on Computational Linguistics and 44th Annual Meeting of the Association for Computational Linguistics",
    month = jul,
    year = "2006",
    address = "Sydney, Australia",
    publisher = "Association for Computational Linguistics",
    url = "https://www.aclweb.org/anthology/P06-1133",
    doi = "10.3115/1220175.1220308",
    pages = "1057--1064",
}
@inproceedings{wiebe-mihalcea-2006-word,
    title = "Word Sense and Subjectivity",
    author = "Wiebe, Janyce  and
      Mihalcea, Rada",
    booktitle = "Proceedings of the 21st International Conference on Computational Linguistics and 44th Annual Meeting of the Association for Computational Linguistics",
    month = jul,
    year = "2006",
    address = "Sydney, Australia",
    publisher = "Association for Computational Linguistics",
    url = "https://www.aclweb.org/anthology/P06-1134",
    doi = "10.3115/1220175.1220309",
    pages = "1065--1072",
}
@inproceedings{prager-etal-2006-improving,
    title = "Improving {QA} Accuracy by Question Inversion",
    author = "Prager, John  and
      Duboue, Pablo  and
      Chu-Carroll, Jennifer",
    booktitle = "Proceedings of the 21st International Conference on Computational Linguistics and 44th Annual Meeting of the Association for Computational Linguistics",
    month = jul,
    year = "2006",
    address = "Sydney, Australia",
    publisher = "Association for Computational Linguistics",
    url = "https://www.aclweb.org/anthology/P06-1135",
    doi = "10.3115/1220175.1220310",
    pages = "1073--1080",
}
@inproceedings{chen-etal-2006-reranking,
    title = "Reranking Answers for Definitional {QA} Using Language Modeling",
    author = "Chen, Yi  and
      Zhou, Ming  and
      Wang, Shilong",
    booktitle = "Proceedings of the 21st International Conference on Computational Linguistics and 44th Annual Meeting of the Association for Computational Linguistics",
    month = jul,
    year = "2006",
    address = "Sydney, Australia",
    publisher = "Association for Computational Linguistics",
    url = "https://www.aclweb.org/anthology/P06-1136",
    doi = "10.3115/1220175.1220311",
    pages = "1081--1088",
}
@inproceedings{feinstein-wintner-2006-highly,
    title = "Highly Constrained Unification Grammars",
    author = "Feinstein, Daniel  and
      Wintner, Shuly",
    booktitle = "Proceedings of the 21st International Conference on Computational Linguistics and 44th Annual Meeting of the Association for Computational Linguistics",
    month = jul,
    year = "2006",
    address = "Sydney, Australia",
    publisher = "Association for Computational Linguistics",
    url = "https://www.aclweb.org/anthology/P06-1137",
    doi = "10.3115/1220175.1220312",
    pages = "1089--1096",
}
@inproceedings{gerdes-kahane-2006-polynomial,
    title = "A Polynomial Parsing Algorithm for the Topological Model: Synchronizing Constituent and Dependency Grammars, Illustrated by {G}erman Word Order Phenomena",
    author = "Gerdes, Kim  and
      Kahane, Sylvain",
    booktitle = "Proceedings of the 21st International Conference on Computational Linguistics and 44th Annual Meeting of the Association for Computational Linguistics",
    month = jul,
    year = "2006",
    address = "Sydney, Australia",
    publisher = "Association for Computational Linguistics",
    url = "https://www.aclweb.org/anthology/P06-1138",
    doi = "10.3115/1220175.1220313",
    pages = "1097--1104",
}
@inproceedings{soricut-marcu-2006-stochastic,
    title = "Stochastic Language Generation Using {WIDL}-Expressions and its Application in Machine Translation and Summarization",
    author = "Soricut, Radu  and
      Marcu, Daniel",
    booktitle = "Proceedings of the 21st International Conference on Computational Linguistics and 44th Annual Meeting of the Association for Computational Linguistics",
    month = jul,
    year = "2006",
    address = "Sydney, Australia",
    publisher = "Association for Computational Linguistics",
    url = "https://www.aclweb.org/anthology/P06-1139",
    doi = "10.3115/1220175.1220314",
    pages = "1105--1112",
}
@inproceedings{nakatsu-white-2006-learning,
    title = "Learning to Say It Well: Reranking Realizations by Predicted Synthesis Quality",
    author = "Nakatsu, Crystal  and
      White, Michael",
    booktitle = "Proceedings of the 21st International Conference on Computational Linguistics and 44th Annual Meeting of the Association for Computational Linguistics",
    month = jul,
    year = "2006",
    address = "Sydney, Australia",
    publisher = "Association for Computational Linguistics",
    url = "https://www.aclweb.org/anthology/P06-1140",
    doi = "10.3115/1220175.1220315",
    pages = "1113--1120",
}
@inproceedings{krishnan-manning-2006-effective,
    title = "An Effective Two-Stage Model for Exploiting Non-Local Dependencies in Named Entity Recognition",
    author = "Krishnan, Vijay  and
      Manning, Christopher D.",
    booktitle = "Proceedings of the 21st International Conference on Computational Linguistics and 44th Annual Meeting of the Association for Computational Linguistics",
    month = jul,
    year = "2006",
    address = "Sydney, Australia",
    publisher = "Association for Computational Linguistics",
    url = "https://www.aclweb.org/anthology/P06-1141",
    doi = "10.3115/1220175.1220316",
    pages = "1121--1128",
}
@inproceedings{kuo-etal-2006-learning,
    title = "Learning Transliteration Lexicons from the Web",
    author = "Kuo, Jin-Shea  and
      Li, Haizhou  and
      Yang, Ying-Kuei",
    booktitle = "Proceedings of the 21st International Conference on Computational Linguistics and 44th Annual Meeting of the Association for Computational Linguistics",
    month = jul,
    year = "2006",
    address = "Sydney, Australia",
    publisher = "Association for Computational Linguistics",
    url = "https://www.aclweb.org/anthology/P06-1142",
    doi = "10.3115/1220175.1220317",
    pages = "1129--1136",
}
@inproceedings{malik-2006-punjabi,
    title = "{P}unjabi Machine Transliteration",
    author = "Malik, M.G. Abbas",
    booktitle = "Proceedings of the 21st International Conference on Computational Linguistics and 44th Annual Meeting of the Association for Computational Linguistics",
    month = jul,
    year = "2006",
    address = "Sydney, Australia",
    publisher = "Association for Computational Linguistics",
    url = "https://www.aclweb.org/anthology/P06-1143",
    doi = "10.3115/1220175.1220318",
    pages = "1137--1144",
}
@inproceedings{montalvo-etal-2006-multilingual,
    title = "Multilingual Document Clustering: An Heuristic Approach Based on Cognate Named Entities",
    author = "Montalvo, Soto  and
      Mart{\'\i}nez, Raquel  and
      Casillas, Arantza  and
      Fresno, V{\'\i}ctor",
    booktitle = "Proceedings of the 21st International Conference on Computational Linguistics and 44th Annual Meeting of the Association for Computational Linguistics",
    month = jul,
    year = "2006",
    address = "Sydney, Australia",
    publisher = "Association for Computational Linguistics",
    url = "https://www.aclweb.org/anthology/P06-1144",
    doi = "10.3115/1220175.1220319",
    pages = "1145--1152",
}
@inproceedings{noro-etal-2006-time,
    title = "Time Period Identification of Events in Text",
    author = "Noro, Taichi  and
      Inui, Takashi  and
      Takamura, Hiroya  and
      Okumura, Manabu",
    booktitle = "Proceedings of the 21st International Conference on Computational Linguistics and 44th Annual Meeting of the Association for Computational Linguistics",
    month = jul,
    year = "2006",
    address = "Sydney, Australia",
    publisher = "Association for Computational Linguistics",
    url = "https://www.aclweb.org/anthology/P06-1145",
    doi = "10.3115/1220175.1220320",
    pages = "1153--1160",
}
@inproceedings{pado-lapata-2006-optimal,
    title = "Optimal Constituent Alignment with Edge Covers for Semantic Projection",
    author = "Pad{\'o}, Sebastian  and
      Lapata, Mirella",
    booktitle = "Proceedings of the 21st International Conference on Computational Linguistics and 44th Annual Meeting of the Association for Computational Linguistics",
    month = jul,
    year = "2006",
    address = "Sydney, Australia",
    publisher = "Association for Computational Linguistics",
    url = "https://www.aclweb.org/anthology/P06-1146",
    doi = "10.3115/1220175.1220321",
    pages = "1161--1168",
}
@inproceedings{wu-strzalkowski-2006-utilizing,
    title = "Utilizing Co-Occurrence of Answers in Question Answering",
    author = "Wu, Min  and
      Strzalkowski, Tomek",
    booktitle = "Proceedings of the 21st International Conference on Computational Linguistics and 44th Annual Meeting of the Association for Computational Linguistics",
    month = jul,
    year = "2006",
    address = "Sydney, Australia",
    publisher = "Association for Computational Linguistics",
    url = "https://www.aclweb.org/anthology/P06-1147",
    doi = "10.3115/1220175.1220322",
    pages = "1169--1176",
}
@proceedings{acl-2006-coling,
    title = "Proceedings of the {COLING}/{ACL} 2006 Main Conference Poster Sessions",
    month = jul,
    year = "2006",
    address = "Sydney, Australia",
    publisher = "Association for Computational Linguistics",
    url = "https://www.aclweb.org/anthology/P06-2000",
}
@inproceedings{alegria-etal-2006-using,
    title = "Using Machine Learning Techniques to Build a Comma Checker for Basque",
    author = "Alegria, I{\~n}aki  and
      Arrieta, Bertol  and
      Diaz de Ilarraza, Arantza  and
      Izagirre, Eli  and
      Maritxalar, Montse",
    booktitle = "Proceedings of the {COLING}/{ACL} 2006 Main Conference Poster Sessions",
    month = jul,
    year = "2006",
    address = "Sydney, Australia",
    publisher = "Association for Computational Linguistics",
    url = "https://www.aclweb.org/anthology/P06-2001",
    pages = "1--8",
}
@inproceedings{alfonseca-etal-2006-rote,
    title = "A Rote Extractor with Edit Distance-Based Generalisation and Multi-Corpora Precision Calculation",
    author = "Alfonseca, Enrique  and
      Castells, Pablo  and
      Okumura, Manabu  and
      Ruiz-Casado, Maria",
    booktitle = "Proceedings of the {COLING}/{ACL} 2006 Main Conference Poster Sessions",
    month = jul,
    year = "2006",
    address = "Sydney, Australia",
    publisher = "Association for Computational Linguistics",
    url = "https://www.aclweb.org/anthology/P06-2002",
    pages = "9--16",
}
@inproceedings{amigo-etal-2006-mt,
    title = "{MT} Evaluation: Human-Like vs. Human Acceptable",
    author = "Amig{\'o}, Enrique  and
      Gim{\'e}nez, Jes{\'u}s  and
      Gonzalo, Julio  and
      M{\`a}rquez, Llu{\'\i}s",
    booktitle = "Proceedings of the {COLING}/{ACL} 2006 Main Conference Poster Sessions",
    month = jul,
    year = "2006",
    address = "Sydney, Australia",
    publisher = "Association for Computational Linguistics",
    url = "https://www.aclweb.org/anthology/P06-2003",
    pages = "17--24",
}
@inproceedings{atterer-schutze-2006-effect,
    title = "The Effect of Corpus Size in Combining Supervised and Unsupervised Training for Disambiguation",
    author = {Atterer, Michaela  and
      Sch{\"u}tze, Hinrich},
    booktitle = "Proceedings of the {COLING}/{ACL} 2006 Main Conference Poster Sessions",
    month = jul,
    year = "2006",
    address = "Sydney, Australia",
    publisher = "Association for Computational Linguistics",
    url = "https://www.aclweb.org/anthology/P06-2004",
    pages = "25--32",
}
@inproceedings{aw-etal-2006-phrase,
    title = "A Phrase-Based Statistical Model for {SMS} Text Normalization",
    author = "Aw, AiTi  and
      Zhang, Min  and
      Xiao, Juan  and
      Su, Jian",
    booktitle = "Proceedings of the {COLING}/{ACL} 2006 Main Conference Poster Sessions",
    month = jul,
    year = "2006",
    address = "Sydney, Australia",
    publisher = "Association for Computational Linguistics",
    url = "https://www.aclweb.org/anthology/P06-2005",
    pages = "33--40",
}
@inproceedings{briscoe-carroll-2006-evaluating,
    title = "Evaluating the Accuracy of an Unlexicalized Statistical Parser on the {PARC} {D}ep{B}ank",
    author = "Briscoe, Ted  and
      Carroll, John",
    booktitle = "Proceedings of the {COLING}/{ACL} 2006 Main Conference Poster Sessions",
    month = jul,
    year = "2006",
    address = "Sydney, Australia",
    publisher = "Association for Computational Linguistics",
    url = "https://www.aclweb.org/anthology/P06-2006",
    pages = "41--48",
}
@inproceedings{carterette-etal-2006-n,
    title = "N Semantic Classes are Harder than Two",
    author = "Carterette, Ben  and
      Jones, Rosie  and
      Greiner, Wiley  and
      Barr, Cory",
    booktitle = "Proceedings of the {COLING}/{ACL} 2006 Main Conference Poster Sessions",
    month = jul,
    year = "2006",
    address = "Sydney, Australia",
    publisher = "Association for Computational Linguistics",
    url = "https://www.aclweb.org/anthology/P06-2007",
    pages = "49--56",
}
@inproceedings{chai-etal-2006-towards,
    title = "Towards Conversational {QA}: Automatic Identification of Problematic Situations and User Intent",
    author = "Chai, Joyce Y.  and
      Zhang, Chen  and
      Baldwin, Tyler",
    booktitle = "Proceedings of the {COLING}/{ACL} 2006 Main Conference Poster Sessions",
    month = jul,
    year = "2006",
    address = "Sydney, Australia",
    publisher = "Association for Computational Linguistics",
    url = "https://www.aclweb.org/anthology/P06-2008",
    pages = "57--64",
}
@inproceedings{chang-etal-2006-pipeline,
    title = "A Pipeline Framework for Dependency Parsing",
    author = "Chang, Ming-Wei  and
      Do, Quang  and
      Roth, Dan",
    booktitle = "Proceedings of the {COLING}/{ACL} 2006 Main Conference Poster Sessions",
    month = jul,
    year = "2006",
    address = "Sydney, Australia",
    publisher = "Association for Computational Linguistics",
    url = "https://www.aclweb.org/anthology/P06-2009",
    pages = "65--72",
}
@inproceedings{che-etal-2006-hybrid,
    title = "A Hybrid Convolution Tree Kernel for Semantic Role Labeling",
    author = "Che, Wanxiang  and
      Zhang, Min  and
      Liu, Ting  and
      Li, Sheng",
    booktitle = "Proceedings of the {COLING}/{ACL} 2006 Main Conference Poster Sessions",
    month = jul,
    year = "2006",
    address = "Sydney, Australia",
    publisher = "Association for Computational Linguistics",
    url = "https://www.aclweb.org/anthology/P06-2010",
    pages = "73--80",
}
@inproceedings{chen-chen-2006-high,
    title = "A High-Accurate {C}hinese-{E}nglish {NE} Backward Translation System Combining Both Lexical Information and Web Statistics",
    author = "Chen, Conrad  and
      Chen, Hsin-Hsi",
    booktitle = "Proceedings of the {COLING}/{ACL} 2006 Main Conference Poster Sessions",
    month = jul,
    year = "2006",
    address = "Sydney, Australia",
    publisher = "Association for Computational Linguistics",
    url = "https://www.aclweb.org/anthology/P06-2011",
    pages = "81--88",
}
@inproceedings{chen-etal-2006-unsupervised,
    title = "Unsupervised Relation Disambiguation Using Spectral Clustering",
    author = "Chen, Jinxiu  and
      Ji, Donghong  and
      Tan, Chew Lim  and
      Niu, Zhengyu",
    booktitle = "Proceedings of the {COLING}/{ACL} 2006 Main Conference Poster Sessions",
    month = jul,
    year = "2006",
    address = "Sydney, Australia",
    publisher = "Association for Computational Linguistics",
    url = "https://www.aclweb.org/anthology/P06-2012",
    pages = "89--96",
}
@inproceedings{chen-etal-2006-empirical,
    title = "An Empirical Study of {C}hinese Chunking",
    author = "Chen, Wenliang  and
      Zhang, Yujie  and
      Isahara, Hitoshi",
    booktitle = "Proceedings of the {COLING}/{ACL} 2006 Main Conference Poster Sessions",
    month = jul,
    year = "2006",
    address = "Sydney, Australia",
    publisher = "Association for Computational Linguistics",
    url = "https://www.aclweb.org/anthology/P06-2013",
    pages = "97--104",
}
@inproceedings{cherry-lin-2006-soft,
    title = "Soft Syntactic Constraints for Word Alignment through Discriminative Training",
    author = "Cherry, Colin  and
      Lin, Dekang",
    booktitle = "Proceedings of the {COLING}/{ACL} 2006 Main Conference Poster Sessions",
    month = jul,
    year = "2006",
    address = "Sydney, Australia",
    publisher = "Association for Computational Linguistics",
    url = "https://www.aclweb.org/anthology/P06-2014",
    pages = "105--112",
}
@inproceedings{chime-2006-account,
    title = "An Account for Compound Prepositions in {F}arsi",
    author = "Chime, Zahra Abolhassani",
    booktitle = "Proceedings of the {COLING}/{ACL} 2006 Main Conference Poster Sessions",
    month = jul,
    year = "2006",
    address = "Sydney, Australia",
    publisher = "Association for Computational Linguistics",
    url = "https://www.aclweb.org/anthology/P06-2015",
    pages = "113--119",
}
@inproceedings{chou-2006-techniques,
    title = "Techniques to Incorporate the Benefits of a Hierarchy in a Modified Hidden {M}arkov Model",
    author = "Chou, Lin-Yi",
    booktitle = "Proceedings of the {COLING}/{ACL} 2006 Main Conference Poster Sessions",
    month = jul,
    year = "2006",
    address = "Sydney, Australia",
    publisher = "Association for Computational Linguistics",
    url = "https://www.aclweb.org/anthology/P06-2016",
    pages = "120--127",
}
@inproceedings{choudhury-etal-2006-analysis,
    title = "Analysis and Synthesis of the Distribution of Consonants over Languages: A Complex Network Approach",
    author = "Choudhury, Monojit  and
      Mukherjee, Animesh  and
      Basu, Anupam  and
      Ganguly, Niloy",
    booktitle = "Proceedings of the {COLING}/{ACL} 2006 Main Conference Poster Sessions",
    month = jul,
    year = "2006",
    address = "Sydney, Australia",
    publisher = "Association for Computational Linguistics",
    url = "https://www.aclweb.org/anthology/P06-2017",
    pages = "128--135",
}
@inproceedings{chrupala-van-genabith-2006-using,
    title = "Using Machine-Learning to Assign Function Labels to Parser Output for {S}panish",
    author = "Chrupa{\l}a, Grzegorz  and
      van Genabith, Josef",
    booktitle = "Proceedings of the {COLING}/{ACL} 2006 Main Conference Poster Sessions",
    month = jul,
    year = "2006",
    address = "Sydney, Australia",
    publisher = "Association for Computational Linguistics",
    url = "https://www.aclweb.org/anthology/P06-2018",
    pages = "136--143",
}
@inproceedings{clarke-lapata-2006-constraint,
    title = "Constraint-Based Sentence Compression: An Integer Programming Approach",
    author = "Clarke, James  and
      Lapata, Mirella",
    booktitle = "Proceedings of the {COLING}/{ACL} 2006 Main Conference Poster Sessions",
    month = jul,
    year = "2006",
    address = "Sydney, Australia",
    publisher = "Association for Computational Linguistics",
    url = "https://www.aclweb.org/anthology/P06-2019",
    pages = "144--151",
}
@inproceedings{conroy-etal-2006-topic,
    title = "Topic-Focused Multi-Document Summarization Using an Approximate Oracle Score",
    author = "Conroy, John M.  and
      Schlesinger, Judith D.  and
      O{'}Leary, Dianne P.",
    booktitle = "Proceedings of the {COLING}/{ACL} 2006 Main Conference Poster Sessions",
    month = jul,
    year = "2006",
    address = "Sydney, Australia",
    publisher = "Association for Computational Linguistics",
    url = "https://www.aclweb.org/anthology/P06-2020",
    pages = "152--159",
}
@inproceedings{costello-etal-2006-using,
    title = "Using {W}ord{N}et to Automatically Deduce Relations between Words in Noun-Noun Compounds",
    author = "Costello, Fintan J.  and
      Veale, Tony  and
      Dunne, Simon",
    booktitle = "Proceedings of the {COLING}/{ACL} 2006 Main Conference Poster Sessions",
    month = jul,
    year = "2006",
    address = "Sydney, Australia",
    publisher = "Association for Computational Linguistics",
    url = "https://www.aclweb.org/anthology/P06-2021",
    pages = "160--167",
}
@inproceedings{creswell-etal-2006-automatically,
    title = "Automatically Extracting Nominal Mentions of Events with a Bootstrapped Probabilistic Classifier",
    author = "Creswell, Cassandre  and
      Beal, Matthew J.  and
      Chen, John  and
      Cornell, Thomas L.  and
      Nilsson, Lars  and
      Srihari, Rohini K.",
    booktitle = "Proceedings of the {COLING}/{ACL} 2006 Main Conference Poster Sessions",
    month = jul,
    year = "2006",
    address = "Sydney, Australia",
    publisher = "Association for Computational Linguistics",
    url = "https://www.aclweb.org/anthology/P06-2022",
    pages = "168--175",
}
@inproceedings{duan-etal-2006-bio,
    title = "A Bio-Inspired Approach for Multi-Word Expression Extraction",
    author = "Duan, Jianyong  and
      Lu, Ruzhan  and
      Wu, Weilin  and
      Hu, Yi  and
      Tian, Yan",
    booktitle = "Proceedings of the {COLING}/{ACL} 2006 Main Conference Poster Sessions",
    month = jul,
    year = "2006",
    address = "Sydney, Australia",
    publisher = "Association for Computational Linguistics",
    url = "https://www.aclweb.org/anthology/P06-2023",
    pages = "176--182",
}
@inproceedings{eckart-2006-towards,
    title = "Towards A Modular Data Model For Multi-Layer Annotated Corpora",
    author = "Eckart, Richard",
    booktitle = "Proceedings of the {COLING}/{ACL} 2006 Main Conference Poster Sessions",
    month = jul,
    year = "2006",
    address = "Sydney, Australia",
    publisher = "Association for Computational Linguistics",
    url = "https://www.aclweb.org/anthology/P06-2024",
    pages = "183--190",
}
@inproceedings{ekbal-etal-2006-modified,
    title = "A Modified Joint Source-Channel Model for Transliteration",
    author = "Ekbal, Asif  and
      Naskar, Sudip Kumar  and
      Bandyopadhyay, Sivaji",
    booktitle = "Proceedings of the {COLING}/{ACL} 2006 Main Conference Poster Sessions",
    month = jul,
    year = "2006",
    address = "Sydney, Australia",
    publisher = "Association for Computational Linguistics",
    url = "https://www.aclweb.org/anthology/P06-2025",
    pages = "191--198",
}
@inproceedings{fang-etal-2006-chinese,
    title = "{C}hinese-{E}nglish Term Translation Mining Based on Semantic Prediction",
    author = "Fang, Gaolin  and
      Yu, Hao  and
      Nishino, Fumihito",
    booktitle = "Proceedings of the {COLING}/{ACL} 2006 Main Conference Poster Sessions",
    month = jul,
    year = "2006",
    address = "Sydney, Australia",
    publisher = "Association for Computational Linguistics",
    url = "https://www.aclweb.org/anthology/P06-2026",
    pages = "199--206",
}
@inproceedings{filatova-etal-2006-automatic,
    title = "Automatic Creation of Domain Templates",
    author = "Filatova, Elena  and
      Hatzivassiloglou, Vasileios  and
      McKeown, Kathleen",
    booktitle = "Proceedings of the {COLING}/{ACL} 2006 Main Conference Poster Sessions",
    month = jul,
    year = "2006",
    address = "Sydney, Australia",
    publisher = "Association for Computational Linguistics",
    url = "https://www.aclweb.org/anthology/P06-2027",
    pages = "207--214",
}
@inproceedings{finch-etal-2006-using,
    title = "Using Lexical Dependency and Ontological Knowledge to Improve a Detailed Syntactic and Semantic Tagger of {E}nglish",
    author = "Finch, Andrew  and
      Black, Ezra  and
      Hwang, Young-Sook  and
      Sumita, Eiichiro",
    booktitle = "Proceedings of the {COLING}/{ACL} 2006 Main Conference Poster Sessions",
    month = jul,
    year = "2006",
    address = "Sydney, Australia",
    publisher = "Association for Computational Linguistics",
    url = "https://www.aclweb.org/anthology/P06-2028",
    pages = "215--222",
}
@inproceedings{foth-menzel-2006-benefit,
    title = "The Benefit of Stochastic {PP} Attachment to a Rule-Based Parser",
    author = "Foth, Kilian A.  and
      Menzel, Wolfgang",
    booktitle = "Proceedings of the {COLING}/{ACL} 2006 Main Conference Poster Sessions",
    month = jul,
    year = "2006",
    address = "Sydney, Australia",
    publisher = "Association for Computational Linguistics",
    url = "https://www.aclweb.org/anthology/P06-2029",
    pages = "223--230",
}
@inproceedings{fukumoto-suzuki-2006-using,
    title = "Using Bilingual Comparable Corpora and Semi-supervised Clustering for Topic Tracking",
    author = "Fukumoto, Fumiyo  and
      Suzuki, Yoshimi",
    booktitle = "Proceedings of the {COLING}/{ACL} 2006 Main Conference Poster Sessions",
    month = jul,
    year = "2006",
    address = "Sydney, Australia",
    publisher = "Association for Computational Linguistics",
    url = "https://www.aclweb.org/anthology/P06-2030",
    pages = "231--238",
}
@inproceedings{fung-chen-2006-robust,
    title = "Robust Word Sense Translation by {EM} Learning of Frame Semantics",
    author = "Fung, Pascale  and
      Chen, Benfeng",
    booktitle = "Proceedings of the {COLING}/{ACL} 2006 Main Conference Poster Sessions",
    month = jul,
    year = "2006",
    address = "Sydney, Australia",
    publisher = "Association for Computational Linguistics",
    url = "https://www.aclweb.org/anthology/P06-2031",
    pages = "239--246",
}
@inproceedings{gardent-parmentier-2006-coreference,
    title = "Coreference Handling in {XMG}",
    author = "Gardent, Claire  and
      Parmentier, Yannick",
    booktitle = "Proceedings of the {COLING}/{ACL} 2006 Main Conference Poster Sessions",
    month = jul,
    year = "2006",
    address = "Sydney, Australia",
    publisher = "Association for Computational Linguistics",
    url = "https://www.aclweb.org/anthology/P06-2032",
    pages = "247--254",
}
@inproceedings{gatt-van-deemter-2006-conceptual,
    title = "Conceptual Coherence in the Generation of Referring Expressions",
    author = "Gatt, Albert  and
      van Deemter, Kees",
    booktitle = "Proceedings of the {COLING}/{ACL} 2006 Main Conference Poster Sessions",
    month = jul,
    year = "2006",
    address = "Sydney, Australia",
    publisher = "Association for Computational Linguistics",
    url = "https://www.aclweb.org/anthology/P06-2033",
    pages = "255--262",
}
@inproceedings{ge-mooney-2006-discriminative,
    title = "Discriminative Reranking for Semantic Parsing",
    author = "Ge, Ruifang  and
      Mooney, Raymond J.",
    booktitle = "Proceedings of the {COLING}/{ACL} 2006 Main Conference Poster Sessions",
    month = jul,
    year = "2006",
    address = "Sydney, Australia",
    publisher = "Association for Computational Linguistics",
    url = "https://www.aclweb.org/anthology/P06-2034",
    pages = "263--270",
}
@inproceedings{giguet-luquet-2006-multilingual,
    title = "Multilingual Lexical Database Generation from Parallel Texts in 20 {E}uropean Languages with Endogenous Resources",
    author = "Giguet, Emmanuel  and
      Luquet, Pierre-Sylvain",
    booktitle = "Proceedings of the {COLING}/{ACL} 2006 Main Conference Poster Sessions",
    month = jul,
    year = "2006",
    address = "Sydney, Australia",
    publisher = "Association for Computational Linguistics",
    url = "https://www.aclweb.org/anthology/P06-2035",
    pages = "271--278",
}
@inproceedings{gildea-etal-2006-factoring,
    title = "Factoring Synchronous Grammars by Sorting",
    author = "Gildea, Daniel  and
      Satta, Giorgio  and
      Zhang, Hao",
    booktitle = "Proceedings of the {COLING}/{ACL} 2006 Main Conference Poster Sessions",
    month = jul,
    year = "2006",
    address = "Sydney, Australia",
    publisher = "Association for Computational Linguistics",
    url = "https://www.aclweb.org/anthology/P06-2036",
    pages = "279--286",
}
@inproceedings{gimenez-marquez-2006-low,
    title = "Low-Cost Enrichment of {S}panish {W}ord{N}et with Automatically Translated Glosses: Combining General and Specialized Models",
    author = "Gim{\'e}nez, Jes{\'u}s  and
      M{\`a}rquez, Llu{\'\i}s",
    booktitle = "Proceedings of the {COLING}/{ACL} 2006 Main Conference Poster Sessions",
    month = jul,
    year = "2006",
    address = "Sydney, Australia",
    publisher = "Association for Computational Linguistics",
    url = "https://www.aclweb.org/anthology/P06-2037",
    pages = "287--294",
}
@inproceedings{glaysher-moldovan-2006-speeding,
    title = "Speeding Up Full Syntactic Parsing by Leveraging Partial Parsing Decisions",
    author = "Glaysher, Elliot  and
      Moldovan, Dan",
    booktitle = "Proceedings of the {COLING}/{ACL} 2006 Main Conference Poster Sessions",
    month = jul,
    year = "2006",
    address = "Sydney, Australia",
    publisher = "Association for Computational Linguistics",
    url = "https://www.aclweb.org/anthology/P06-2038",
    pages = "295--300",
}
@inproceedings{goyal-chatterjee-2006-parsing,
    title = "Parsing Aligned Parallel Corpus by Projecting Syntactic Relations from Annotated Source Corpus",
    author = "Goyal, Shailly  and
      Chatterjee, Niladri",
    booktitle = "Proceedings of the {COLING}/{ACL} 2006 Main Conference Poster Sessions",
    month = jul,
    year = "2006",
    address = "Sydney, Australia",
    publisher = "Association for Computational Linguistics",
    url = "https://www.aclweb.org/anthology/P06-2039",
    pages = "301--308",
}
@inproceedings{ha-etal-2006-reduced,
    title = "Reduced n-gram Models for {E}nglish and {C}hinese Corpora",
    author = "Ha, Le Q  and
      Hanna, P  and
      Stewart, D W  and
      Smith, F J",
    booktitle = "Proceedings of the {COLING}/{ACL} 2006 Main Conference Poster Sessions",
    month = jul,
    year = "2006",
    address = "Sydney, Australia",
    publisher = "Association for Computational Linguistics",
    url = "https://www.aclweb.org/anthology/P06-2040",
    pages = "309--315",
}
@inproceedings{hall-etal-2006-discriminative,
    title = "Discriminative Classifiers for Deterministic Dependency Parsing",
    author = "Hall, Johan  and
      Nivre, Joakim  and
      Nilsson, Jens",
    booktitle = "Proceedings of the {COLING}/{ACL} 2006 Main Conference Poster Sessions",
    month = jul,
    year = "2006",
    address = "Sydney, Australia",
    publisher = "Association for Computational Linguistics",
    url = "https://www.aclweb.org/anthology/P06-2041",
    pages = "316--323",
}
@inproceedings{hamabe-etal-2006-detection,
    title = "Detection of Quotations and Inserted Clauses and Its Application to Dependency Structure Analysis in Spontaneous {J}apanese",
    author = "Hamabe, Ryoji  and
      Uchimoto, Kiyotaka  and
      Kawahara, Tatsuya  and
      Isahara, Hitoshi",
    booktitle = "Proceedings of the {COLING}/{ACL} 2006 Main Conference Poster Sessions",
    month = jul,
    year = "2006",
    address = "Sydney, Australia",
    publisher = "Association for Computational Linguistics",
    url = "https://www.aclweb.org/anthology/P06-2042",
    pages = "324--330",
}
@inproceedings{han-etal-2006-improving,
    title = "Improving {E}nglish Subcategorization Acquisition with Diathesis Alternations as Heuristic Information",
    author = "Han, Xiwu  and
      Zhao, Tiejun  and
      Fu, Xingshang",
    booktitle = "Proceedings of the {COLING}/{ACL} 2006 Main Conference Poster Sessions",
    month = jul,
    year = "2006",
    address = "Sydney, Australia",
    publisher = "Association for Computational Linguistics",
    url = "https://www.aclweb.org/anthology/P06-2043",
    pages = "331--336",
}
@inproceedings{hargreaves-ramsay-2006-local,
    title = "Local Constraints on Sentence Markers and Focus in {S}omali",
    author = "Hargreaves, Katherine  and
      Ramsay, Allan",
    booktitle = "Proceedings of the {COLING}/{ACL} 2006 Main Conference Poster Sessions",
    month = jul,
    year = "2006",
    address = "Sydney, Australia",
    publisher = "Association for Computational Linguistics",
    url = "https://www.aclweb.org/anthology/P06-2044",
    pages = "337--344",
}
@inproceedings{haruechaiyasak-etal-2006-collaborative,
    title = "A Collaborative Framework for Collecting {T}hai Unknown Words from the Web",
    author = "Haruechaiyasak, Choochart  and
      Sangkeettrakarn, Chatchawal  and
      Palingoon, Pornpimon  and
      Kongyoung, Sarawoot  and
      Damrongrat, Chaianun",
    booktitle = "Proceedings of the {COLING}/{ACL} 2006 Main Conference Poster Sessions",
    month = jul,
    year = "2006",
    address = "Sydney, Australia",
    publisher = "Association for Computational Linguistics",
    url = "https://www.aclweb.org/anthology/P06-2045",
    pages = "345--352",
}
@inproceedings{hashimoto-etal-2006-japanese,
    title = "{J}apanese Idiom Recognition: Drawing a Line between Literal and Idiomatic Meanings",
    author = "Hashimoto, Chikara  and
      Sato, Satoshi  and
      Utsuro, Takehito",
    booktitle = "Proceedings of the {COLING}/{ACL} 2006 Main Conference Poster Sessions",
    month = jul,
    year = "2006",
    address = "Sydney, Australia",
    publisher = "Association for Computational Linguistics",
    url = "https://www.aclweb.org/anthology/P06-2046",
    pages = "353--360",
}
@inproceedings{hirakawa-2006-graph,
    title = "Graph Branch Algorithm: An Optimum Tree Search Method for Scored Dependency Graph with Arc Co-Occurrence Constraints",
    author = "Hirakawa, Hideki",
    booktitle = "Proceedings of the {COLING}/{ACL} 2006 Main Conference Poster Sessions",
    month = jul,
    year = "2006",
    address = "Sydney, Australia",
    publisher = "Association for Computational Linguistics",
    url = "https://www.aclweb.org/anthology/P06-2047",
    pages = "361--368",
}
@inproceedings{hopkins-kuhn-2006-exploring,
    title = "Exploring the Potential of Intractable Parsers",
    author = "Hopkins, Mark  and
      Kuhn, Jonas",
    booktitle = "Proceedings of the {COLING}/{ACL} 2006 Main Conference Poster Sessions",
    month = jul,
    year = "2006",
    address = "Sydney, Australia",
    publisher = "Association for Computational Linguistics",
    url = "https://www.aclweb.org/anthology/P06-2048",
    pages = "369--376",
}
@inproceedings{horacek-wolska-2006-transformation,
    title = "Transformation-Based Interpretation of Implicit Parallel Structures: Reconstructing the Meaning of {``}vice versa{''} and Similar Linguistic Operators",
    author = "Horacek, Helmut  and
      Wolska, Magdalena",
    booktitle = "Proceedings of the {COLING}/{ACL} 2006 Main Conference Poster Sessions",
    month = jul,
    year = "2006",
    address = "Sydney, Australia",
    publisher = "Association for Computational Linguistics",
    url = "https://www.aclweb.org/anthology/P06-2049",
    pages = "377--384",
}
@inproceedings{hsieh-huang-2006-conset,
    title = "When Conset Meets Synset: A Preliminary Survey of an Ontological Lexical Resource Based on {C}hinese Characters",
    author = "Hsieh, Shu-Kai  and
      Huang, Chu-Ren",
    booktitle = "Proceedings of the {COLING}/{ACL} 2006 Main Conference Poster Sessions",
    month = jul,
    year = "2006",
    address = "Sydney, Australia",
    publisher = "Association for Computational Linguistics",
    url = "https://www.aclweb.org/anthology/P06-2050",
    pages = "385--390",
}
@inproceedings{huwel-wrede-2006-spontaneous,
    title = "Spontaneous Speech Understanding for Robust Multi-Modal Human-Robot Communication",
    author = {H{\"u}wel, Sonja  and
      Wrede, Britta},
    booktitle = "Proceedings of the {COLING}/{ACL} 2006 Main Conference Poster Sessions",
    month = jul,
    year = "2006",
    address = "Sydney, Australia",
    publisher = "Association for Computational Linguistics",
    url = "https://www.aclweb.org/anthology/P06-2051",
    pages = "391--398",
}
@inproceedings{ichikawa-etal-2006-efficient,
    title = "Efficient Sentence Retrieval Based on Syntactic Structure",
    author = "Ichikawa, Hiroshi  and
      Hakoda, Keita  and
      Hashimoto, Taiichi  and
      Tokunaga, Takenobu",
    booktitle = "Proceedings of the {COLING}/{ACL} 2006 Main Conference Poster Sessions",
    month = jul,
    year = "2006",
    address = "Sydney, Australia",
    publisher = "Association for Computational Linguistics",
    url = "https://www.aclweb.org/anthology/P06-2052",
    pages = "399--406",
}
@inproceedings{jabbari-etal-2006-towards,
    title = "Towards the Orwellian Nightmare: Separation of Business and Personal Emails",
    author = "Jabbari, Sanaz  and
      Allison, Ben  and
      Guthrie, David  and
      Guthrie, Louise",
    booktitle = "Proceedings of the {COLING}/{ACL} 2006 Main Conference Poster Sessions",
    month = jul,
    year = "2006",
    address = "Sydney, Australia",
    publisher = "Association for Computational Linguistics",
    url = "https://www.aclweb.org/anthology/P06-2053",
    pages = "407--411",
}
@inproceedings{jeong-lee-2006-exploiting,
    title = "Exploiting Non-Local Features for Spoken Language Understanding",
    author = "Jeong, Minwoo  and
      Lee, Gary Geunbae",
    booktitle = "Proceedings of the {COLING}/{ACL} 2006 Main Conference Poster Sessions",
    month = jul,
    year = "2006",
    address = "Sydney, Australia",
    publisher = "Association for Computational Linguistics",
    url = "https://www.aclweb.org/anthology/P06-2054",
    pages = "412--419",
}
@inproceedings{ji-grishman-2006-analysis,
    title = "Analysis and Repair of Name Tagger Errors",
    author = "Ji, Heng  and
      Grishman, Ralph",
    booktitle = "Proceedings of the {COLING}/{ACL} 2006 Main Conference Poster Sessions",
    month = jul,
    year = "2006",
    address = "Sydney, Australia",
    publisher = "Association for Computational Linguistics",
    url = "https://www.aclweb.org/anthology/P06-2055",
    pages = "420--427",
}
@inproceedings{jin-tanaka-ishii-2006-unsupervised,
    title = "Unsupervised Segmentation of {C}hinese Text by Use of Branching Entropy",
    author = "Jin, Zhihui  and
      Tanaka-Ishii, Kumiko",
    booktitle = "Proceedings of the {COLING}/{ACL} 2006 Main Conference Poster Sessions",
    month = jul,
    year = "2006",
    address = "Sydney, Australia",
    publisher = "Association for Computational Linguistics",
    url = "https://www.aclweb.org/anthology/P06-2056",
    pages = "428--435",
}
@inproceedings{johansson-nugues-2006-framenet,
    title = "A {F}rame{N}et-Based Semantic Role Labeler for {S}wedish",
    author = "Johansson, Richard  and
      Nugues, Pierre",
    booktitle = "Proceedings of the {COLING}/{ACL} 2006 Main Conference Poster Sessions",
    month = jul,
    year = "2006",
    address = "Sydney, Australia",
    publisher = "Association for Computational Linguistics",
    url = "https://www.aclweb.org/anthology/P06-2057",
    pages = "436--443",
}
@inproceedings{kacmarcik-gamon-2006-obfuscating,
    title = "Obfuscating Document Stylometry to Preserve Author Anonymity",
    author = "Kacmarcik, Gary  and
      Gamon, Michael",
    booktitle = "Proceedings of the {COLING}/{ACL} 2006 Main Conference Poster Sessions",
    month = jul,
    year = "2006",
    address = "Sydney, Australia",
    publisher = "Association for Computational Linguistics",
    url = "https://www.aclweb.org/anthology/P06-2058",
    pages = "444--451",
}
@inproceedings{kaji-kitsuregawa-2006-automatic,
    title = "Automatic Construction of Polarity-Tagged Corpus from {HTML} Documents",
    author = "Kaji, Nobuhiro  and
      Kitsuregawa, Masaru",
    booktitle = "Proceedings of the {COLING}/{ACL} 2006 Main Conference Poster Sessions",
    month = jul,
    year = "2006",
    address = "Sydney, Australia",
    publisher = "Association for Computational Linguistics",
    url = "https://www.aclweb.org/anthology/P06-2059",
    pages = "452--459",
}
@inproceedings{kambhatla-2006-minority,
    title = "Minority Vote: At-Least-N Voting Improves Recall for Extracting Relations",
    author = "Kambhatla, Nanda",
    booktitle = "Proceedings of the {COLING}/{ACL} 2006 Main Conference Poster Sessions",
    month = jul,
    year = "2006",
    address = "Sydney, Australia",
    publisher = "Association for Computational Linguistics",
    url = "https://www.aclweb.org/anthology/P06-2060",
    pages = "460--466",
}
@inproceedings{khadivi-etal-2006-integration,
    title = "Integration of Speech to Computer-Assisted Translation Using Finite-State Automata",
    author = "Khadivi, Shahram  and
      Zens, Richard  and
      Ney, Hermann",
    booktitle = "Proceedings of the {COLING}/{ACL} 2006 Main Conference Poster Sessions",
    month = jul,
    year = "2006",
    address = "Sydney, Australia",
    publisher = "Association for Computational Linguistics",
    url = "https://www.aclweb.org/anthology/P06-2061",
    pages = "467--474",
}
@inproceedings{khegai-2006-gf,
    title = "{GF} Parallel Resource Grammars and {R}ussian",
    author = "Khegai, Janna",
    booktitle = "Proceedings of the {COLING}/{ACL} 2006 Main Conference Poster Sessions",
    month = jul,
    year = "2006",
    address = "Sydney, Australia",
    publisher = "Association for Computational Linguistics",
    url = "https://www.aclweb.org/anthology/P06-2062",
    pages = "475--482",
}
@inproceedings{kim-hovy-2006-automatic,
    title = "Automatic Identification of Pro and Con Reasons in Online Reviews",
    author = "Kim, Soo-Min  and
      Hovy, Eduard",
    booktitle = "Proceedings of the {COLING}/{ACL} 2006 Main Conference Poster Sessions",
    month = jul,
    year = "2006",
    address = "Sydney, Australia",
    publisher = "Association for Computational Linguistics",
    url = "https://www.aclweb.org/anthology/P06-2063",
    pages = "483--490",
}
@inproceedings{kim-baldwin-2006-interpreting,
    title = "Interpreting Semantic Relations in Noun Compounds via Verb Semantics",
    author = "Kim, Su Nam  and
      Baldwin, Timothy",
    booktitle = "Proceedings of the {COLING}/{ACL} 2006 Main Conference Poster Sessions",
    month = jul,
    year = "2006",
    address = "Sydney, Australia",
    publisher = "Association for Computational Linguistics",
    url = "https://www.aclweb.org/anthology/P06-2064",
    pages = "491--498",
}
@inproceedings{knight-etal-2006-unsupervised,
    title = "Unsupervised Analysis for Decipherment Problems",
    author = "Knight, Kevin  and
      Nair, Anish  and
      Rathod, Nishit  and
      Yamada, Kenji",
    booktitle = "Proceedings of the {COLING}/{ACL} 2006 Main Conference Poster Sessions",
    month = jul,
    year = "2006",
    address = "Sydney, Australia",
    publisher = "Association for Computational Linguistics",
    url = "https://www.aclweb.org/anthology/P06-2065",
    pages = "499--506",
}
@inproceedings{kuhlmann-nivre-2006-mildly,
    title = "Mildly Non-Projective Dependency Structures",
    author = "Kuhlmann, Marco  and
      Nivre, Joakim",
    booktitle = "Proceedings of the {COLING}/{ACL} 2006 Main Conference Poster Sessions",
    month = jul,
    year = "2006",
    address = "Sydney, Australia",
    publisher = "Association for Computational Linguistics",
    url = "https://www.aclweb.org/anthology/P06-2066",
    pages = "507--514",
}
@inproceedings{li-brew-2006-parsing,
    title = "Parsing and Subcategorization Data",
    author = "Li, Jianguo  and
      Brew, Chris",
    booktitle = "Proceedings of the {COLING}/{ACL} 2006 Main Conference Poster Sessions",
    month = jul,
    year = "2006",
    address = "Sydney, Australia",
    publisher = "Association for Computational Linguistics",
    url = "https://www.aclweb.org/anthology/P06-2067",
    pages = "515--522",
}
@inproceedings{lin-2006-role,
    title = "The Role of Information Retrieval in Answering Complex Questions",
    author = "Lin, Jimmy",
    booktitle = "Proceedings of the {COLING}/{ACL} 2006 Main Conference Poster Sessions",
    month = jul,
    year = "2006",
    address = "Sydney, Australia",
    publisher = "Association for Computational Linguistics",
    url = "https://www.aclweb.org/anthology/P06-2068",
    pages = "523--530",
}
@inproceedings{lioma-ounis-2006-examining,
    title = "Examining the Content Load of Part of Speech Blocks for Information Retrieval",
    author = "Lioma, Christina  and
      Ounis, Iadh",
    booktitle = "Proceedings of the {COLING}/{ACL} 2006 Main Conference Poster Sessions",
    month = jul,
    year = "2006",
    address = "Sydney, Australia",
    publisher = "Association for Computational Linguistics",
    url = "https://www.aclweb.org/anthology/P06-2069",
    pages = "531--538",
}
@inproceedings{liu-gildea-2006-stochastic,
    title = "Stochastic Iterative Alignment for Machine Translation Evaluation",
    author = "Liu, Ding  and
      Gildea, Daniel",
    booktitle = "Proceedings of the {COLING}/{ACL} 2006 Main Conference Poster Sessions",
    month = jul,
    year = "2006",
    address = "Sydney, Australia",
    publisher = "Association for Computational Linguistics",
    url = "https://www.aclweb.org/anthology/P06-2070",
    pages = "539--546",
}
@inproceedings{loeff-etal-2006-discriminating,
    title = "Discriminating Image Senses by Clustering with Multimodal Features",
    author = "Loeff, Nicolas  and
      Alm, Cecilia Ovesdotter  and
      Forsyth, David A.",
    booktitle = "Proceedings of the {COLING}/{ACL} 2006 Main Conference Poster Sessions",
    month = jul,
    year = "2006",
    address = "Sydney, Australia",
    publisher = "Association for Computational Linguistics",
    url = "https://www.aclweb.org/anthology/P06-2071",
    pages = "547--554",
}
@inproceedings{marrafa-mendes-2006-modeling,
    title = "Modeling Adjectives in Computational Relational Lexica",
    author = "Marrafa, Palmira  and
      Mendes, Sara",
    booktitle = "Proceedings of the {COLING}/{ACL} 2006 Main Conference Poster Sessions",
    month = jul,
    year = "2006",
    address = "Sydney, Australia",
    publisher = "Association for Computational Linguistics",
    url = "https://www.aclweb.org/anthology/P06-2072",
    pages = "555--562",
}
@inproceedings{martinez-hinarejos-etal-2006-segmented,
    title = "Segmented and Unsegmented Dialogue-Act Annotation with Statistical Dialogue Models",
    author = "Mart{\'\i}nez Hinarejos, Carlos D.  and
      Granell, Ram{\'o}n  and
      Bened{\'\i}, Jos{\'e} Miguel",
    booktitle = "Proceedings of the {COLING}/{ACL} 2006 Main Conference Poster Sessions",
    month = jul,
    year = "2006",
    address = "Sydney, Australia",
    publisher = "Association for Computational Linguistics",
    url = "https://www.aclweb.org/anthology/P06-2073",
    pages = "563--570",
}
@inproceedings{maslennikov-etal-2006-instance,
    title = "{ARE}: Instance Splitting Strategies for Dependency Relation-Based Information Extraction",
    author = "Maslennikov, Mstislav  and
      Goh, Hai-Kiat  and
      Chua, Tat-Seng",
    booktitle = "Proceedings of the {COLING}/{ACL} 2006 Main Conference Poster Sessions",
    month = jul,
    year = "2006",
    address = "Sydney, Australia",
    publisher = "Association for Computational Linguistics",
    url = "https://www.aclweb.org/anthology/P06-2074",
    pages = "571--578",
}
@inproceedings{mirkin-etal-2006-integrating,
    title = "Integrating Pattern-Based and Distributional Similarity Methods for Lexical Entailment Acquisition",
    author = "Mirkin, Shachar  and
      Dagan, Ido  and
      Geffet, Maayan",
    booktitle = "Proceedings of the {COLING}/{ACL} 2006 Main Conference Poster Sessions",
    month = jul,
    year = "2006",
    address = "Sydney, Australia",
    publisher = "Association for Computational Linguistics",
    url = "https://www.aclweb.org/anthology/P06-2075",
    pages = "579--586",
}
@inproceedings{murata-etal-2006-machine,
    title = "Machine-Learning-Based Transformation of Passive {J}apanese Sentences into Active by Separating Training Data into Each Input Particle",
    author = "Murata, Masaki  and
      Kanamaru, Toshiyuki  and
      Shirado, Tamotsu  and
      Isahara, Hitoshi",
    booktitle = "Proceedings of the {COLING}/{ACL} 2006 Main Conference Poster Sessions",
    month = jul,
    year = "2006",
    address = "Sydney, Australia",
    publisher = "Association for Computational Linguistics",
    url = "https://www.aclweb.org/anthology/P06-2076",
    pages = "587--594",
}
@inproceedings{nagata-etal-2006-reinforcing,
    title = "Reinforcing {E}nglish Countability Prediction with One Countability per Discourse Property",
    author = "Nagata, Ryo  and
      Kawai, Atsuo  and
      Morihiro, Koichiro  and
      Isu, Naoki",
    booktitle = "Proceedings of the {COLING}/{ACL} 2006 Main Conference Poster Sessions",
    month = jul,
    year = "2006",
    address = "Sydney, Australia",
    publisher = "Association for Computational Linguistics",
    url = "https://www.aclweb.org/anthology/P06-2077",
    pages = "595--602",
}
@inproceedings{nanba-okumura-2006-automatic,
    title = "An Automatic Method for Summary Evaluation Using Multiple Evaluation Results by a Manual Method",
    author = "Nanba, Hidetsugu  and
      Okumura, Manabu",
    booktitle = "Proceedings of the {COLING}/{ACL} 2006 Main Conference Poster Sessions",
    month = jul,
    year = "2006",
    address = "Sydney, Australia",
    publisher = "Association for Computational Linguistics",
    url = "https://www.aclweb.org/anthology/P06-2078",
    pages = "603--610",
}
@inproceedings{ng-etal-2006-examining,
    title = "Examining the Role of Linguistic Knowledge Sources in the Automatic Identification and Classification of Reviews",
    author = "Ng, Vincent  and
      Dasgupta, Sajib  and
      Arifin, S. M. Niaz",
    booktitle = "Proceedings of the {COLING}/{ACL} 2006 Main Conference Poster Sessions",
    month = jul,
    year = "2006",
    address = "Sydney, Australia",
    publisher = "Association for Computational Linguistics",
    url = "https://www.aclweb.org/anthology/P06-2079",
    pages = "611--618",
}
@inproceedings{nguyen-etal-2006-semantic,
    title = "Semantic Parsing with Structured {SVM} Ensemble Classification Models",
    author = "Nguyen, Le-Minh  and
      Shimazu, Akira  and
      Phan, Xuan-Hieu",
    booktitle = "Proceedings of the {COLING}/{ACL} 2006 Main Conference Poster Sessions",
    month = jul,
    year = "2006",
    address = "Sydney, Australia",
    publisher = "Association for Computational Linguistics",
    url = "https://www.aclweb.org/anthology/P06-2080",
    pages = "619--626",
}
@inproceedings{oberlander-nowson-2006-whose,
    title = "Whose Thumb Is It Anyway? Classifying Author Personality from Weblog Text",
    author = "Oberlander, Jon  and
      Nowson, Scott",
    booktitle = "Proceedings of the {COLING}/{ACL} 2006 Main Conference Poster Sessions",
    month = jul,
    year = "2006",
    address = "Sydney, Australia",
    publisher = "Association for Computational Linguistics",
    url = "https://www.aclweb.org/anthology/P06-2081",
    pages = "627--634",
}
@inproceedings{ohtake-2006-analysis,
    title = "Analysis of Selective Strategies to Build a Dependency-Analyzed Corpus",
    author = "Ohtake, Kiyonori",
    booktitle = "Proceedings of the {COLING}/{ACL} 2006 Main Conference Poster Sessions",
    month = jul,
    year = "2006",
    address = "Sydney, Australia",
    publisher = "Association for Computational Linguistics",
    url = "https://www.aclweb.org/anthology/P06-2082",
    pages = "635--642",
}
@inproceedings{okazaki-ananiadou-2006-term,
    title = "A Term Recognition Approach to Acronym Recognition",
    author = "Okazaki, Naoaki  and
      Ananiadou, Sophia",
    booktitle = "Proceedings of the {COLING}/{ACL} 2006 Main Conference Poster Sessions",
    month = jul,
    year = "2006",
    address = "Sydney, Australia",
    publisher = "Association for Computational Linguistics",
    url = "https://www.aclweb.org/anthology/P06-2083",
    pages = "643--650",
}
@inproceedings{pecina-schlesinger-2006-combining,
    title = "Combining Association Measures for Collocation Extraction",
    author = "Pecina, Pavel  and
      Schlesinger, Pavel",
    booktitle = "Proceedings of the {COLING}/{ACL} 2006 Main Conference Poster Sessions",
    month = jul,
    year = "2006",
    address = "Sydney, Australia",
    publisher = "Association for Computational Linguistics",
    url = "https://www.aclweb.org/anthology/P06-2084",
    pages = "651--658",
}
@inproceedings{rieser-lemon-2006-using,
    title = "Using Machine Learning to Explore Human Multimodal Clarification Strategies",
    author = "Rieser, Verena  and
      Lemon, Oliver",
    booktitle = "Proceedings of the {COLING}/{ACL} 2006 Main Conference Poster Sessions",
    month = jul,
    year = "2006",
    address = "Sydney, Australia",
    publisher = "Association for Computational Linguistics",
    url = "https://www.aclweb.org/anthology/P06-2085",
    pages = "659--666",
}
@inproceedings{rosenfeld-feldman-2006-ures,
    title = "{URES} : an Unsupervised Web Relation Extraction System",
    author = "Rosenfeld, Benjamin  and
      Feldman, Ronen",
    booktitle = "Proceedings of the {COLING}/{ACL} 2006 Main Conference Poster Sessions",
    month = jul,
    year = "2006",
    address = "Sydney, Australia",
    publisher = "Association for Computational Linguistics",
    url = "https://www.aclweb.org/anthology/P06-2086",
    pages = "667--674",
}
@inproceedings{ruch-etal-2006-argumentative,
    title = "Argumentative Feedback: A Linguistically-Motivated Term Expansion for Information Retrieval",
    author = "Ruch, Patrick  and
      Tbahriti, Imad  and
      Gobeill, Julien  and
      Aronson, Alan R.",
    booktitle = "Proceedings of the {COLING}/{ACL} 2006 Main Conference Poster Sessions",
    month = jul,
    year = "2006",
    address = "Sydney, Australia",
    publisher = "Association for Computational Linguistics",
    url = "https://www.aclweb.org/anthology/P06-2087",
    pages = "675--682",
}
@inproceedings{ryu-etal-2006-simultaneous,
    title = "Simultaneous {E}nglish-{J}apanese Spoken Language Translation Based on Incremental Dependency Parsing and Transfer",
    author = "Ryu, Koichiro  and
      Matsubara, Shigeki  and
      Inagaki, Yasuyoshi",
    booktitle = "Proceedings of the {COLING}/{ACL} 2006 Main Conference Poster Sessions",
    month = jul,
    year = "2006",
    address = "Sydney, Australia",
    publisher = "Association for Computational Linguistics",
    url = "https://www.aclweb.org/anthology/P06-2088",
    pages = "683--690",
}
@inproceedings{sagae-lavie-2006-best,
    title = "A Best-First Probabilistic Shift-Reduce Parser",
    author = "Sagae, Kenji  and
      Lavie, Alon",
    booktitle = "Proceedings of the {COLING}/{ACL} 2006 Main Conference Poster Sessions",
    month = jul,
    year = "2006",
    address = "Sydney, Australia",
    publisher = "Association for Computational Linguistics",
    url = "https://www.aclweb.org/anthology/P06-2089",
    pages = "691--698",
}
@inproceedings{santini-etal-2006-implementing,
    title = "Implementing a Characterization of Genre for Automatic Genre Identification of Web Pages",
    author = "Santini, Marina  and
      Power, Richard  and
      Evans, Roger",
    booktitle = "Proceedings of the {COLING}/{ACL} 2006 Main Conference Poster Sessions",
    month = jul,
    year = "2006",
    address = "Sydney, Australia",
    publisher = "Association for Computational Linguistics",
    url = "https://www.aclweb.org/anthology/P06-2090",
    pages = "699--706",
}
@inproceedings{sato-etal-2006-translating,
    title = "Translating {HPSG}-Style Outputs of a Robust Parser into Typed Dynamic Logic",
    author = "Sato, Manabu  and
      Bekki, Daisuke  and
      Miyao, Yusuke  and
      Tsujii, Jun{'}ichi",
    booktitle = "Proceedings of the {COLING}/{ACL} 2006 Main Conference Poster Sessions",
    month = jul,
    year = "2006",
    address = "Sydney, Australia",
    publisher = "Association for Computational Linguistics",
    url = "https://www.aclweb.org/anthology/P06-2091",
    pages = "707--714",
}
@inproceedings{schrader-2006-atlas,
    title = "{ATLAS} {--} A New Text Alignment Architecture",
    author = "Schrader, Bettina",
    booktitle = "Proceedings of the {COLING}/{ACL} 2006 Main Conference Poster Sessions",
    month = jul,
    year = "2006",
    address = "Sydney, Australia",
    publisher = "Association for Computational Linguistics",
    url = "https://www.aclweb.org/anthology/P06-2092",
    pages = "715--722",
}
@inproceedings{schwenk-etal-2006-continuous,
    title = "Continuous Space Language Models for Statistical Machine Translation",
    author = "Schwenk, Holger  and
      Dechelotte, Daniel  and
      Gauvain, Jean-Luc",
    booktitle = "Proceedings of the {COLING}/{ACL} 2006 Main Conference Poster Sessions",
    month = jul,
    year = "2006",
    address = "Sydney, Australia",
    publisher = "Association for Computational Linguistics",
    url = "https://www.aclweb.org/anthology/P06-2093",
    pages = "723--730",
}
@inproceedings{sekine-2006-demand,
    title = "On-Demand Information Extraction",
    author = "Sekine, Satoshi",
    booktitle = "Proceedings of the {COLING}/{ACL} 2006 Main Conference Poster Sessions",
    month = jul,
    year = "2006",
    address = "Sydney, Australia",
    publisher = "Association for Computational Linguistics",
    url = "https://www.aclweb.org/anthology/P06-2094",
    pages = "731--738",
}
@inproceedings{sharoff-etal-2006-using,
    title = "Using Comparable Corpora to Solve Problems Difficult for Human Translators",
    author = "Sharoff, Serge  and
      Babych, Bogdan  and
      Hartley, Anthony",
    booktitle = "Proceedings of the {COLING}/{ACL} 2006 Main Conference Poster Sessions",
    month = jul,
    year = "2006",
    address = "Sydney, Australia",
    publisher = "Association for Computational Linguistics",
    url = "https://www.aclweb.org/anthology/P06-2095",
    pages = "739--746",
}
@inproceedings{shen-etal-2006-adding,
    title = "Adding Syntax to Dynamic Programming for Aligning Comparable Texts for the Generation of Paraphrases",
    author = {Shen, Siwei  and
      Radev, Dragomir R.  and
      Patel, Agam  and
      Erkan, G{\"u}ne{\c{s}}},
    booktitle = "Proceedings of the {COLING}/{ACL} 2006 Main Conference Poster Sessions",
    month = jul,
    year = "2006",
    address = "Sydney, Australia",
    publisher = "Association for Computational Linguistics",
    url = "https://www.aclweb.org/anthology/P06-2096",
    pages = "747--754",
}
@inproceedings{shibata-kurohashi-2006-unsupervised,
    title = "Unsupervised Topic Identification by Integrating Linguistic and Visual Information Based on Hidden {M}arkov Models",
    author = "Shibata, Tomohide  and
      Kurohashi, Sadao",
    booktitle = "Proceedings of the {COLING}/{ACL} 2006 Main Conference Poster Sessions",
    month = jul,
    year = "2006",
    address = "Sydney, Australia",
    publisher = "Association for Computational Linguistics",
    url = "https://www.aclweb.org/anthology/P06-2097",
    pages = "755--762",
}
@inproceedings{shimizu-haas-2006-exact,
    title = "Exact Decoding for Jointly Labeling and Chunking Sequences",
    author = "Shimizu, Nobuyuki  and
      Haas, Andrew",
    booktitle = "Proceedings of the {COLING}/{ACL} 2006 Main Conference Poster Sessions",
    month = jul,
    year = "2006",
    address = "Sydney, Australia",
    publisher = "Association for Computational Linguistics",
    url = "https://www.aclweb.org/anthology/P06-2098",
    pages = "763--770",
}
@inproceedings{shirai-ookawa-2006-compiling,
    title = "Compiling a Lexicon of Cooking Actions for Animation Generation",
    author = "Shirai, Kiyoaki  and
      Ookawa, Hiroshi",
    booktitle = "Proceedings of the {COLING}/{ACL} 2006 Main Conference Poster Sessions",
    month = jul,
    year = "2006",
    address = "Sydney, Australia",
    publisher = "Association for Computational Linguistics",
    url = "https://www.aclweb.org/anthology/P06-2099",
    pages = "771--778",
}
@inproceedings{singh-etal-2006-morphological,
    title = "Morphological Richness Offsets Resource Demand {--} Experiences in Constructing a {POS} Tagger for {H}indi",
    author = "Singh, Smriti  and
      Gupta, Kuhoo  and
      Shrivastava, Manish  and
      Bhattacharyya, Pushpak",
    booktitle = "Proceedings of the {COLING}/{ACL} 2006 Main Conference Poster Sessions",
    month = jul,
    year = "2006",
    address = "Sydney, Australia",
    publisher = "Association for Computational Linguistics",
    url = "https://www.aclweb.org/anthology/P06-2100",
    pages = "779--786",
}
@inproceedings{smith-eisner-2006-minimum,
    title = "Minimum Risk Annealing for Training Log-Linear Models",
    author = "Smith, David A.  and
      Eisner, Jason",
    booktitle = "Proceedings of the {COLING}/{ACL} 2006 Main Conference Poster Sessions",
    month = jul,
    year = "2006",
    address = "Sydney, Australia",
    publisher = "Association for Computational Linguistics",
    url = "https://www.aclweb.org/anthology/P06-2101",
    pages = "787--794",
}
@inproceedings{snider-diab-2006-unsupervised,
    title = "Unsupervised Induction of Modern Standard {A}rabic Verb Classes Using Syntactic Frames and {LSA}",
    author = "Snider, Neal  and
      Diab, Mona",
    booktitle = "Proceedings of the {COLING}/{ACL} 2006 Main Conference Poster Sessions",
    month = jul,
    year = "2006",
    address = "Sydney, Australia",
    publisher = "Association for Computational Linguistics",
    url = "https://www.aclweb.org/anthology/P06-2102",
    pages = "795--802",
}
@inproceedings{soricut-marcu-2006-discourse,
    title = "Discourse Generation Using Utility-Trained Coherence Models",
    author = "Soricut, Radu  and
      Marcu, Daniel",
    booktitle = "Proceedings of the {COLING}/{ACL} 2006 Main Conference Poster Sessions",
    month = jul,
    year = "2006",
    address = "Sydney, Australia",
    publisher = "Association for Computational Linguistics",
    url = "https://www.aclweb.org/anthology/P06-2103",
    pages = "803--810",
}
@inproceedings{swanson-gordon-2006-comparison,
    title = "A Comparison of Alternative Parse Tree Paths for Labeling Semantic Roles",
    author = "Swanson, Reid  and
      Gordon, Andrew S.",
    booktitle = "Proceedings of the {COLING}/{ACL} 2006 Main Conference Poster Sessions",
    month = jul,
    year = "2006",
    address = "Sydney, Australia",
    publisher = "Association for Computational Linguistics",
    url = "https://www.aclweb.org/anthology/P06-2104",
    pages = "811--818",
}
@inproceedings{tatu-moldovan-2006-logic,
    title = "A Logic-Based Semantic Approach to Recognizing Textual Entailment",
    author = "Tatu, Marta  and
      Moldovan, Dan",
    booktitle = "Proceedings of the {COLING}/{ACL} 2006 Main Conference Poster Sessions",
    month = jul,
    year = "2006",
    address = "Sydney, Australia",
    publisher = "Association for Computational Linguistics",
    url = "https://www.aclweb.org/anthology/P06-2105",
    pages = "819--826",
}
@inproceedings{tokunaga-etal-2006-infrastructure,
    title = "Infrastructure for Standardization of {A}sian Language Resources",
    author = "Tokunaga, Takenobu  and
      Sornlertlamvanich, Virach  and
      Charoenporn, Thatsanee  and
      Calzolari, Nicoletta  and
      Monachini, Monica  and
      Soria, Claudia  and
      Huang, Chu-Ren  and
      Xia, YingJu  and
      Yu, Hao  and
      Prevot, Laurent  and
      Shirai, Kiyoaki",
    booktitle = "Proceedings of the {COLING}/{ACL} 2006 Main Conference Poster Sessions",
    month = jul,
    year = "2006",
    address = "Sydney, Australia",
    publisher = "Association for Computational Linguistics",
    url = "https://www.aclweb.org/anthology/P06-2106",
    pages = "827--834",
}
@inproceedings{tomas-casacuberta-2006-statistical,
    title = "Statistical Phrase-Based Models for Interactive Computer-Assisted Translation",
    author = "Tom{\'a}s, Jes{\'u}s  and
      Casacuberta, Francisco",
    booktitle = "Proceedings of the {COLING}/{ACL} 2006 Main Conference Poster Sessions",
    month = jul,
    year = "2006",
    address = "Sydney, Australia",
    publisher = "Association for Computational Linguistics",
    url = "https://www.aclweb.org/anthology/P06-2107",
    pages = "835--841",
}
@inproceedings{tsai-2006-using,
    title = "Using Word Support Model to Improve {C}hinese Input System",
    author = "Tsai, Jia-Lin",
    booktitle = "Proceedings of the {COLING}/{ACL} 2006 Main Conference Poster Sessions",
    month = jul,
    year = "2006",
    address = "Sydney, Australia",
    publisher = "Association for Computational Linguistics",
    url = "https://www.aclweb.org/anthology/P06-2108",
    pages = "842--849",
}
@inproceedings{unno-etal-2006-trimming,
    title = "Trimming {CFG} Parse Trees for Sentence Compression Using Machine Learning Approaches",
    author = "Unno, Yuya  and
      Ninomiya, Takashi  and
      Miyao, Yusuke  and
      Tsujii, Jun{'}ichi",
    booktitle = "Proceedings of the {COLING}/{ACL} 2006 Main Conference Poster Sessions",
    month = jul,
    year = "2006",
    address = "Sydney, Australia",
    publisher = "Association for Computational Linguistics",
    url = "https://www.aclweb.org/anthology/P06-2109",
    pages = "850--857",
}
@inproceedings{utsumi-suzuki-2006-word,
    title = "Word Vectors and Two Kinds of Similarity",
    author = "Utsumi, Akira  and
      Suzuki, Daisuke",
    booktitle = "Proceedings of the {COLING}/{ACL} 2006 Main Conference Poster Sessions",
    month = jul,
    year = "2006",
    address = "Sydney, Australia",
    publisher = "Association for Computational Linguistics",
    url = "https://www.aclweb.org/anthology/P06-2110",
    pages = "858--865",
}
@inproceedings{van-der-plas-tiedemann-2006-finding,
    title = "Finding Synonyms Using Automatic Word Alignment and Measures of Distributional Similarity",
    author = {van der Plas, Lonneke  and
      Tiedemann, J{\"o}rg},
    booktitle = "Proceedings of the {COLING}/{ACL} 2006 Main Conference Poster Sessions",
    month = jul,
    year = "2006",
    address = "Sydney, Australia",
    publisher = "Association for Computational Linguistics",
    url = "https://www.aclweb.org/anthology/P06-2111",
    pages = "866--873",
}
@inproceedings{wang-etal-2006-word,
    title = "Word Alignment for Languages with Scarce Resources Using Bilingual Corpora of Other Language Pairs",
    author = "Wang, Haifeng  and
      Wu, Hua  and
      Liu, Zhanyi",
    booktitle = "Proceedings of the {COLING}/{ACL} 2006 Main Conference Poster Sessions",
    month = jul,
    year = "2006",
    address = "Sydney, Australia",
    publisher = "Association for Computational Linguistics",
    url = "https://www.aclweb.org/anthology/P06-2112",
    pages = "874--881",
}
@inproceedings{wang-etal-2006-combining,
    title = "Combining Statistical and Knowledge-Based Spoken Language Understanding in Conditional Models",
    author = "Wang, Ye-Yi  and
      Acero, Alex  and
      Mahajan, Milind  and
      Lee, John",
    booktitle = "Proceedings of the {COLING}/{ACL} 2006 Main Conference Poster Sessions",
    month = jul,
    year = "2006",
    address = "Sydney, Australia",
    publisher = "Association for Computational Linguistics",
    url = "https://www.aclweb.org/anthology/P06-2113",
    pages = "882--889",
}
@inproceedings{wasala-etal-2006-sinhala,
    title = "{S}inhala Grapheme-to-Phoneme Conversion and Rules for Schwa Epenthesis",
    author = "Wasala, Asanka  and
      Weerasinghe, Ruvan  and
      Gamage, Kumudu",
    booktitle = "Proceedings of the {COLING}/{ACL} 2006 Main Conference Poster Sessions",
    month = jul,
    year = "2006",
    address = "Sydney, Australia",
    publisher = "Association for Computational Linguistics",
    url = "https://www.aclweb.org/anthology/P06-2114",
    pages = "890--897",
}
@inproceedings{wu-lowery-2006-prosodic,
    title = "From Prosodic Trees to Syntactic Trees",
    author = "Wu, Andi  and
      Lowery, Kirk",
    booktitle = "Proceedings of the {COLING}/{ACL} 2006 Main Conference Poster Sessions",
    month = jul,
    year = "2006",
    address = "Sydney, Australia",
    publisher = "Association for Computational Linguistics",
    url = "https://www.aclweb.org/anthology/P06-2115",
    pages = "898--904",
}
@inproceedings{wu-lee-2006-grammatical,
    title = "A Grammatical Approach to Understanding Textual Tables Using Two-Dimensional {SCFG}s",
    author = "Wu, Dekai  and
      Lee, Ken Wing Kuen",
    booktitle = "Proceedings of the {COLING}/{ACL} 2006 Main Conference Poster Sessions",
    month = jul,
    year = "2006",
    address = "Sydney, Australia",
    publisher = "Association for Computational Linguistics",
    url = "https://www.aclweb.org/anthology/P06-2116",
    pages = "905--912",
}
@inproceedings{wu-etal-2006-boosting,
    title = "Boosting Statistical Word Alignment Using Labeled and Unlabeled Data",
    author = "Wu, Hua  and
      Wang, Haifeng  and
      Liu, Zhanyi",
    booktitle = "Proceedings of the {COLING}/{ACL} 2006 Main Conference Poster Sessions",
    month = jul,
    year = "2006",
    address = "Sydney, Australia",
    publisher = "Association for Computational Linguistics",
    url = "https://www.aclweb.org/anthology/P06-2117",
    pages = "913--920",
}
@inproceedings{xue-etal-2006-aligning,
    title = "Aligning Features with Sense Distinction Dimensions",
    author = "Xue, Nianwen  and
      Chen, Jinying  and
      Palmer, Martha",
    booktitle = "Proceedings of the {COLING}/{ACL} 2006 Main Conference Poster Sessions",
    month = jul,
    year = "2006",
    address = "Sydney, Australia",
    publisher = "Association for Computational Linguistics",
    url = "https://www.aclweb.org/anthology/P06-2118",
    pages = "921--928",
}
@inproceedings{yang-powers-2006-word,
    title = "Word Sense Disambiguation Using Lexical Cohesion in the Context",
    author = "Yang, Dongqiang  and
      Powers, David M. W.",
    booktitle = "Proceedings of the {COLING}/{ACL} 2006 Main Conference Poster Sessions",
    month = jul,
    year = "2006",
    address = "Sydney, Australia",
    publisher = "Association for Computational Linguistics",
    url = "https://www.aclweb.org/anthology/P06-2119",
    pages = "929--936",
}
@inproceedings{yeh-etal-2006-stochastic,
    title = "Stochastic Discourse Modeling in Spoken Dialogue Systems Using Semantic Dependency Graphs",
    author = "Yeh, Jui-Feng  and
      Wu, Chung-Hsien  and
      Yang, Mao-Zhu",
    booktitle = "Proceedings of the {COLING}/{ACL} 2006 Main Conference Poster Sessions",
    month = jul,
    year = "2006",
    address = "Sydney, Australia",
    publisher = "Association for Computational Linguistics",
    url = "https://www.aclweb.org/anthology/P06-2120",
    pages = "937--944",
}
@inproceedings{yu-etal-2006-hal,
    title = "{HAL}-Based Cascaded Model for Variable-Length Semantic Pattern Induction from Psychiatry Web Resources",
    author = "Yu, Liang-Chih  and
      Wu, Chung-Hsien  and
      Jang, Fong-Lin",
    booktitle = "Proceedings of the {COLING}/{ACL} 2006 Main Conference Poster Sessions",
    month = jul,
    year = "2006",
    address = "Sydney, Australia",
    publisher = "Association for Computational Linguistics",
    url = "https://www.aclweb.org/anthology/P06-2121",
    pages = "945--952",
}
@inproceedings{zhang-gildea-2006-inducing,
    title = "Inducing Word Alignments with Bilexical Synchronous Trees",
    author = "Zhang, Hao  and
      Gildea, Daniel",
    booktitle = "Proceedings of the {COLING}/{ACL} 2006 Main Conference Poster Sessions",
    month = jul,
    year = "2006",
    address = "Sydney, Australia",
    publisher = "Association for Computational Linguistics",
    url = "https://www.aclweb.org/anthology/P06-2122",
    pages = "953--960",
}
@inproceedings{zhang-etal-2006-subword,
    title = "Subword-Based Tagging for Confidence-Dependent {C}hinese Word Segmentation",
    author = "Zhang, Ruiqiang  and
      Kikui, Genichiro  and
      Sumita, Eiichiro",
    booktitle = "Proceedings of the {COLING}/{ACL} 2006 Main Conference Poster Sessions",
    month = jul,
    year = "2006",
    address = "Sydney, Australia",
    publisher = "Association for Computational Linguistics",
    url = "https://www.aclweb.org/anthology/P06-2123",
    pages = "961--968",
}
@inproceedings{zhao-xing-2006-bitam,
    title = "{B}i{TAM}: Bilingual Topic {A}d{M}ixture Models for Word Alignment",
    author = "Zhao, Bing  and
      Xing, Eric P.",
    booktitle = "Proceedings of the {COLING}/{ACL} 2006 Main Conference Poster Sessions",
    month = jul,
    year = "2006",
    address = "Sydney, Australia",
    publisher = "Association for Computational Linguistics",
    url = "https://www.aclweb.org/anthology/P06-2124",
    pages = "969--976",
}
@inproceedings{zhu-li-2006-hmm,
    title = "An {HMM}-Based Approach to Automatic Phrasing for {M}andarin Text-to-Speech Synthesis",
    author = "Zhu, Jing  and
      Li, Jian-Hua",
    booktitle = "Proceedings of the {COLING}/{ACL} 2006 Main Conference Poster Sessions",
    month = jul,
    year = "2006",
    address = "Sydney, Australia",
    publisher = "Association for Computational Linguistics",
    url = "https://www.aclweb.org/anthology/P06-2125",
    pages = "977--982",
}
@proceedings{acl-2006-coling-acl,
    title = "Proceedings of the {COLING}/{ACL} 2006 Student Research Workshop",
    author = "Carpuat, Marine  and
      Duh, Kevin  and
      Hwa, Rebecca",
    month = jul,
    year = "2006",
    address = "Sydney, Australia",
    publisher = "Association for Computational Linguistics",
    url = "https://www.aclweb.org/anthology/P06-3000",
}
@inproceedings{biswas-2006-flexible,
    title = "A Flexible Approach to Natural Language Generation for Disabled Children",
    author = "Biswas, Pradipta",
    booktitle = "Proceedings of the {COLING}/{ACL} 2006 Student Research Workshop",
    month = jul,
    year = "2006",
    address = "Sydney, Australia",
    publisher = "Association for Computational Linguistics",
    url = "https://www.aclweb.org/anthology/P06-3001",
    pages = "1--6",
}
@inproceedings{biemann-2006-unsupervised,
    title = "Unsupervised Part-of-Speech Tagging Employing Efficient Graph Clustering",
    author = "Biemann, Chris",
    booktitle = "Proceedings of the {COLING}/{ACL} 2006 Student Research Workshop",
    month = jul,
    year = "2006",
    address = "Sydney, Australia",
    publisher = "Association for Computational Linguistics",
    url = "https://www.aclweb.org/anthology/P06-3002",
    pages = "7--12",
}
@inproceedings{cromieres-2006-sub,
    title = "Sub-Sentential Alignment Using Substring Co-Occurrence Counts",
    author = "Cromieres, Fabien",
    booktitle = "Proceedings of the {COLING}/{ACL} 2006 Student Research Workshop",
    month = jul,
    year = "2006",
    address = "Sydney, Australia",
    publisher = "Association for Computational Linguistics",
    url = "https://www.aclweb.org/anthology/P06-3003",
    pages = "13--18",
}
@inproceedings{maier-2006-annotation,
    title = "Annotation Schemes and their Influence on Parsing Results",
    author = "Maier, Wolfgang",
    booktitle = "Proceedings of the {COLING}/{ACL} 2006 Student Research Workshop",
    month = jul,
    year = "2006",
    address = "Sydney, Australia",
    publisher = "Association for Computational Linguistics",
    url = "https://www.aclweb.org/anthology/P06-3004",
    pages = "19--24",
}
@inproceedings{park-2006-modeling,
    title = "Modeling Human Sentence Processing Data with a Statistical Parts-of-Speech Tagger",
    author = "Park, Jihyun",
    booktitle = "Proceedings of the {COLING}/{ACL} 2006 Student Research Workshop",
    month = jul,
    year = "2006",
    address = "Sydney, Australia",
    publisher = "Association for Computational Linguistics",
    url = "https://www.aclweb.org/anthology/P06-3005",
    pages = "25--30",
}
@inproceedings{shimizu-2006-semantic,
    title = "Semantic Discourse Segmentation and Labeling for Route Instructions",
    author = "Shimizu, Nobuyuki",
    booktitle = "Proceedings of the {COLING}/{ACL} 2006 Student Research Workshop",
    month = jul,
    year = "2006",
    address = "Sydney, Australia",
    publisher = "Association for Computational Linguistics",
    url = "https://www.aclweb.org/anthology/P06-3006",
    pages = "31--36",
}
@inproceedings{wu-2006-investigations,
    title = "Investigations on Event-Based Summarization",
    author = "Wu, Mingli",
    booktitle = "Proceedings of the {COLING}/{ACL} 2006 Student Research Workshop",
    month = jul,
    year = "2006",
    address = "Sydney, Australia",
    publisher = "Association for Computational Linguistics",
    url = "https://www.aclweb.org/anthology/P06-3007",
    pages = "37--42",
}
@inproceedings{yue-2006-discursive,
    title = "Discursive Usage of Six {C}hinese Punctuation Marks",
    author = "Yue, Ming",
    booktitle = "Proceedings of the {COLING}/{ACL} 2006 Student Research Workshop",
    month = jul,
    year = "2006",
    address = "Sydney, Australia",
    publisher = "Association for Computational Linguistics",
    url = "https://www.aclweb.org/anthology/P06-3008",
    pages = "43--48",
}
@inproceedings{tsarfaty-2006-integrated,
    title = "Integrated Morphological and Syntactic Disambiguation for Modern {H}ebrew",
    author = "Tsarfaty, Reut",
    booktitle = "Proceedings of the {COLING}/{ACL} 2006 Student Research Workshop",
    month = jul,
    year = "2006",
    address = "Sydney, Australia",
    publisher = "Association for Computational Linguistics",
    url = "https://www.aclweb.org/anthology/P06-3009",
    pages = "49--54",
}
@inproceedings{specia-2006-hybrid,
    title = "A Hybrid Relational Approach for {WSD} {--} First Results",
    author = "Specia, Lucia",
    booktitle = "Proceedings of the {COLING}/{ACL} 2006 Student Research Workshop",
    month = jul,
    year = "2006",
    address = "Sydney, Australia",
    publisher = "Association for Computational Linguistics",
    url = "https://www.aclweb.org/anthology/P06-3010",
    pages = "55--60",
}
@inproceedings{loos-2006-on2l,
    title = "{O}n2{L} {--} A Framework for Incremental Ontology Learning in Spoken Dialog Systems",
    author = "Loos, Berenike",
    booktitle = "Proceedings of the {COLING}/{ACL} 2006 Student Research Workshop",
    month = jul,
    year = "2006",
    address = "Sydney, Australia",
    publisher = "Association for Computational Linguistics",
    url = "https://www.aclweb.org/anthology/P06-3011",
    pages = "61--66",
}
@inproceedings{narupiyakul-2006-focus,
    title = "Focus to Emphasize Tone Structures for Prosodic Analysis in Spoken Language Generation",
    author = "Narupiyakul, Lalita",
    booktitle = "Proceedings of the {COLING}/{ACL} 2006 Student Research Workshop",
    month = jul,
    year = "2006",
    address = "Sydney, Australia",
    publisher = "Association for Computational Linguistics",
    url = "https://www.aclweb.org/anthology/P06-3012",
    pages = "67--72",
}
@inproceedings{park-2006-extraction,
    title = "Extraction of Tree Adjoining Grammars from a Treebank for {K}orean",
    author = "Park, Jungyeul",
    booktitle = "Proceedings of the {COLING}/{ACL} 2006 Student Research Workshop",
    month = jul,
    year = "2006",
    address = "Sydney, Australia",
    publisher = "Association for Computational Linguistics",
    url = "https://www.aclweb.org/anthology/P06-3013",
    pages = "73--78",
}
@inproceedings{li-2006-parsing,
    title = "Parsing and Subcategorization Data",
    author = "Li, Jianguo",
    booktitle = "Proceedings of the {COLING}/{ACL} 2006 Student Research Workshop",
    month = jul,
    year = "2006",
    address = "Sydney, Australia",
    publisher = "Association for Computational Linguistics",
    url = "https://www.aclweb.org/anthology/P06-3014",
    pages = "79--84",
}
@inproceedings{rudzicz-2006-clavius,
    title = "{C}lavius: Bi-Directional Parsing for Generic Multimodal Interaction",
    author = "Rudzicz, Frank",
    booktitle = "Proceedings of the {COLING}/{ACL} 2006 Student Research Workshop",
    month = jul,
    year = "2006",
    address = "Sydney, Australia",
    publisher = "Association for Computational Linguistics",
    url = "https://www.aclweb.org/anthology/P06-3015",
    pages = "85--90",
}
@proceedings{acl-2006-coling-acl-2006,
    title = "Proceedings of the {COLING}/{ACL} 2006 Interactive Presentation Sessions",
    author = "Curran, James",
    month = jul,
    year = "2006",
    address = "Sydney, Australia",
    publisher = "Association for Computational Linguistics",
    url = "https://www.aclweb.org/anthology/P06-4000",
}
@inproceedings{chen-etal-2006-fast,
    title = "{FAST} {--} An Automatic Generation System for Grammar Tests",
    author = "Chen, Chia-Yin  and
      Liou, Hsien-Chin  and
      Chang, Jason S.",
    booktitle = "Proceedings of the {COLING}/{ACL} 2006 Interactive Presentation Sessions",
    month = jul,
    year = "2006",
    address = "Sydney, Australia",
    publisher = "Association for Computational Linguistics",
    url = "https://www.aclweb.org/anthology/P06-4001",
    doi = "10.3115/1225403.1225404",
    pages = "1--4",
}
@inproceedings{montero-araki-2006-correct,
    title = "Is It Correct? {--} Towards Web-Based Evaluation of Automatic Natural Language Phrase Generation",
    author = "Montero, Calkin S.  and
      Araki, Kenji",
    booktitle = "Proceedings of the {COLING}/{ACL} 2006 Interactive Presentation Sessions",
    month = jul,
    year = "2006",
    address = "Sydney, Australia",
    publisher = "Association for Computational Linguistics",
    url = "https://www.aclweb.org/anthology/P06-4002",
    doi = "10.3115/1225403.1225405",
    pages = "5--8",
}
@inproceedings{tesconi-etal-2006-lexflow,
    title = "{L}e{XF}low: A System for Cross-Fertilization of Computational Lexicons",
    author = "Tesconi, Maurizio  and
      Marchetti, Andrea  and
      Bertagna, Francesca  and
      Monachini, Monica  and
      Soria, Claudia  and
      Calzolari, Nicoletta",
    booktitle = "Proceedings of the {COLING}/{ACL} 2006 Interactive Presentation Sessions",
    month = jul,
    year = "2006",
    address = "Sydney, Australia",
    publisher = "Association for Computational Linguistics",
    url = "https://www.aclweb.org/anthology/P06-4003",
    doi = "10.3115/1225403.1225406",
    pages = "9--12",
}
@inproceedings{navigli-2006-valido,
    title = "{V}alido: A Visual Tool for Validating Sense Annotations",
    author = "Navigli, Roberto",
    booktitle = "Proceedings of the {COLING}/{ACL} 2006 Interactive Presentation Sessions",
    month = jul,
    year = "2006",
    address = "Sydney, Australia",
    publisher = "Association for Computational Linguistics",
    url = "https://www.aclweb.org/anthology/P06-4004",
    doi = "10.3115/1225403.1225407",
    pages = "13--16",
}
@inproceedings{ohta-etal-2006-intelligent,
    title = "An Intelligent Search Engine and {GUI}-based Efficient {MEDLINE} Search Tool Based on Deep Syntactic Parsing",
    author = "Ohta, Tomoko  and
      Miyao, Yusuke  and
      Ninomiya, Takashi  and
      Tsuruoka, Yoshimasa  and
      Yakushiji, Akane  and
      Masuda, Katsuya  and
      Takeuchi, Jumpei  and
      Yoshida, Kazuhiro  and
      Hara, Tadayoshi  and
      Kim, Jin-Dong  and
      Tateisi, Yuka  and
      Tsujii, Jun{'}ichi",
    booktitle = "Proceedings of the {COLING}/{ACL} 2006 Interactive Presentation Sessions",
    month = jul,
    year = "2006",
    address = "Sydney, Australia",
    publisher = "Association for Computational Linguistics",
    url = "https://www.aclweb.org/anthology/P06-4005",
    doi = "10.3115/1225403.1225408",
    pages = "17--20",
}
@inproceedings{mima-2006-mima,
    title = "{MIMA} Search: A Structuring Knowledge System towards Innovation for Engineering Education",
    author = "Mima, Hideki",
    booktitle = "Proceedings of the {COLING}/{ACL} 2006 Interactive Presentation Sessions",
    month = jul,
    year = "2006",
    address = "Sydney, Australia",
    publisher = "Association for Computational Linguistics",
    url = "https://www.aclweb.org/anthology/P06-4006",
    doi = "10.3115/1225403.1225409",
    pages = "21--24",
}
@inproceedings{hickl-etal-2006-ferret,
    title = "{FERRET}: Interactive Question-Answering for Real-World Environments",
    author = "Hickl, Andrew  and
      Wang, Patrick  and
      Lehmann, John  and
      Harabagiu, Sanda",
    booktitle = "Proceedings of the {COLING}/{ACL} 2006 Interactive Presentation Sessions",
    month = jul,
    year = "2006",
    address = "Sydney, Australia",
    publisher = "Association for Computational Linguistics",
    url = "https://www.aclweb.org/anthology/P06-4007",
    doi = "10.3115/1225403.1225410",
    pages = "25--28",
}
@inproceedings{song-etal-2006-k,
    title = "{K}-{QARD}: A Practical {K}orean Question Answering Framework for Restricted Domain",
    author = "Song, Young-In  and
      Chung, HooJung  and
      Han, Kyoung-Soo  and
      Lee, JooYoung  and
      Rim, Hae-Chang  and
      Lee, Jae-Won",
    booktitle = "Proceedings of the {COLING}/{ACL} 2006 Interactive Presentation Sessions",
    month = jul,
    year = "2006",
    address = "Sydney, Australia",
    publisher = "Association for Computational Linguistics",
    url = "https://www.aclweb.org/anthology/P06-4008",
    doi = "10.3115/1225403.1225411",
    pages = "29--32",
}
@inproceedings{mazur-dale-2006-intermediate,
    title = "An Intermediate Representation for the Interpretation of Temporal Expressions",
    author = "Mazur, Pawe{\l}  and
      Dale, Robert",
    booktitle = "Proceedings of the {COLING}/{ACL} 2006 Interactive Presentation Sessions",
    month = jul,
    year = "2006",
    address = "Sydney, Australia",
    publisher = "Association for Computational Linguistics",
    url = "https://www.aclweb.org/anthology/P06-4009",
    doi = "10.3115/1225403.1225412",
    pages = "33--36",
}
@inproceedings{yao-uszkoreit-2006-chinese,
    title = "{C}hinese Named Entity and Relation Identification System",
    author = "Yao, Tianfang  and
      Uszkoreit, Hans",
    booktitle = "Proceedings of the {COLING}/{ACL} 2006 Interactive Presentation Sessions",
    month = jul,
    year = "2006",
    address = "Sydney, Australia",
    publisher = "Association for Computational Linguistics",
    url = "https://www.aclweb.org/anthology/P06-4010",
    doi = "10.3115/1225403.1225413",
    pages = "37--40",
}
@inproceedings{wu-etal-2006-computational,
    title = "Computational Analysis of Move Structures in Academic Abstracts",
    author = "Wu, Jien-Chen  and
      Chang, Yu-Chia  and
      Liou, Hsien-Chin  and
      Chang, Jason S.",
    booktitle = "Proceedings of the {COLING}/{ACL} 2006 Interactive Presentation Sessions",
    month = jul,
    year = "2006",
    address = "Sydney, Australia",
    publisher = "Association for Computational Linguistics",
    url = "https://www.aclweb.org/anthology/P06-4011",
    doi = "10.3115/1225403.1225414",
    pages = "41--44",
}
@inproceedings{radev-etal-2006-lexnet,
    title = "{L}ex{N}et: A Graphical Environment for Graph-Based {NLP}",
    author = {Radev, Dragomir R.  and
      Erkan, G{\"u}ne{\c{s}}  and
      Fader, Anthony  and
      Jordan, Patrick  and
      Shen, Siwei  and
      Sweeney, James P.},
    booktitle = "Proceedings of the {COLING}/{ACL} 2006 Interactive Presentation Sessions",
    month = jul,
    year = "2006",
    address = "Sydney, Australia",
    publisher = "Association for Computational Linguistics",
    url = "https://www.aclweb.org/anthology/P06-4012",
    doi = "10.3115/1225403.1225415",
    pages = "45--48",
}
@inproceedings{ailomaa-etal-2006-archivus,
    title = "{A}rchivus: A Multimodal System for Multimedia Meeting Browsing and Retrieval",
    author = "Ailomaa, Marita  and
      Melichar, Miroslav  and
      Lisowska, Agnes  and
      Rajman, Martin  and
      Armstrong, Susan",
    booktitle = "Proceedings of the {COLING}/{ACL} 2006 Interactive Presentation Sessions",
    month = jul,
    year = "2006",
    address = "Sydney, Australia",
    publisher = "Association for Computational Linguistics",
    url = "https://www.aclweb.org/anthology/P06-4013",
    doi = "10.3115/1225403.1225416",
    pages = "49--52",
}
@inproceedings{lonning-oepen-2006-usable,
    title = "Re-Usable Tools for Precision Machine Translation",
    author = "L{\o}nning, Jan Tore  and
      Oepen, Stephan",
    booktitle = "Proceedings of the {COLING}/{ACL} 2006 Interactive Presentation Sessions",
    month = jul,
    year = "2006",
    address = "Sydney, Australia",
    publisher = "Association for Computational Linguistics",
    url = "https://www.aclweb.org/anthology/P06-4014",
    doi = "10.3115/1225403.1225417",
    pages = "53--56",
}
@inproceedings{becker-etal-2006-sammie,
    title = "The {SAMMIE} System: Multimodal In-Car Dialogue",
    author = "Becker, Tilman  and
      Poller, Peter  and
      Schehl, Jan  and
      Blaylock, Nate  and
      Gerstenberger, Ciprian  and
      Kruijff-Korbayov{\'a}, Ivana",
    booktitle = "Proceedings of the {COLING}/{ACL} 2006 Interactive Presentation Sessions",
    month = jul,
    year = "2006",
    address = "Sydney, Australia",
    publisher = "Association for Computational Linguistics",
    url = "https://www.aclweb.org/anthology/P06-4015",
    doi = "10.3115/1225403.1225418",
    pages = "57--60",
}
@inproceedings{wehrli-2006-twicpen,
    title = "{T}wic{P}en: Hand-held Scanner and Translation Software for non-Native Readers",
    author = "Wehrli, Eric",
    booktitle = "Proceedings of the {COLING}/{ACL} 2006 Interactive Presentation Sessions",
    month = jul,
    year = "2006",
    address = "Sydney, Australia",
    publisher = "Association for Computational Linguistics",
    url = "https://www.aclweb.org/anthology/P06-4016",
    doi = "10.3115/1225403.1225419",
    pages = "61--64",
}
@inproceedings{fujita-etal-2006-implemented,
    title = "An Implemented Description of {J}apanese: The {L}exeed Dictionary and the {H}inoki Treebank",
    author = "Fujita, Sanae  and
      Tanaka, Takaaki  and
      Bond, Francis  and
      Nakaiwa, Hiromi",
    booktitle = "Proceedings of the {COLING}/{ACL} 2006 Interactive Presentation Sessions",
    month = jul,
    year = "2006",
    address = "Sydney, Australia",
    publisher = "Association for Computational Linguistics",
    url = "https://www.aclweb.org/anthology/P06-4017",
    doi = "10.3115/1225403.1225420",
    pages = "65--68",
}
@inproceedings{bird-2006-nltk,
    title = "{NLTK}: The {N}atural {L}anguage {T}oolkit",
    author = "Bird, Steven",
    booktitle = "Proceedings of the {COLING}/{ACL} 2006 Interactive Presentation Sessions",
    month = jul,
    year = "2006",
    address = "Sydney, Australia",
    publisher = "Association for Computational Linguistics",
    url = "https://www.aclweb.org/anthology/P06-4018",
    doi = "10.3115/1225403.1225421",
    pages = "69--72",
}
@inproceedings{blanc-constant-2006-outilex,
    title = "{O}utilex, a Linguistic Platform for Text Processing",
    author = "Blanc, Olivier  and
      Constant, Matthieu",
    booktitle = "Proceedings of the {COLING}/{ACL} 2006 Interactive Presentation Sessions",
    month = jul,
    year = "2006",
    address = "Sydney, Australia",
    publisher = "Association for Computational Linguistics",
    url = "https://www.aclweb.org/anthology/P06-4019",
    doi = "10.3115/1225403.1225422",
    pages = "73--76",
}
@inproceedings{briscoe-etal-2006-second,
    title = "The Second Release of the {RASP} System",
    author = "Briscoe, Ted  and
      Carroll, John  and
      Watson, Rebecca",
    booktitle = "Proceedings of the {COLING}/{ACL} 2006 Interactive Presentation Sessions",
    month = jul,
    year = "2006",
    address = "Sydney, Australia",
    publisher = "Association for Computational Linguistics",
    url = "https://www.aclweb.org/anthology/P06-4020",
    doi = "10.3115/1225403.1225423",
    pages = "77--80",
}
@proceedings{acl-2012-association,
    title = "Proceedings of the 50th Annual Meeting of the Association for Computational Linguistics (Volume 1: Long Papers)",
    author = "Li, Haizhou  and
      Lin, Chin-Yew  and
      Osborne, Miles  and
      Lee, Gary Geunbae  and
      Park, Jong C.",
    month = jul,
    year = "2012",
    address = "Jeju Island, Korea",
    publisher = "Association for Computational Linguistics",
    url = "https://www.aclweb.org/anthology/P12-1000",
}
@inproceedings{duh-etal-2012-learning,
    title = "Learning to Translate with Multiple Objectives",
    author = "Duh, Kevin  and
      Sudoh, Katsuhito  and
      Wu, Xianchao  and
      Tsukada, Hajime  and
      Nagata, Masaaki",
    booktitle = "Proceedings of the 50th Annual Meeting of the Association for Computational Linguistics (Volume 1: Long Papers)",
    month = jul,
    year = "2012",
    address = "Jeju Island, Korea",
    publisher = "Association for Computational Linguistics",
    url = "https://www.aclweb.org/anthology/P12-1001",
    pages = "1--10",
}
@inproceedings{simianer-etal-2012-joint,
    title = "Joint Feature Selection in Distributed Stochastic Learning for Large-Scale Discriminative Training in {SMT}",
    author = "Simianer, Patrick  and
      Riezler, Stefan  and
      Dyer, Chris",
    booktitle = "Proceedings of the 50th Annual Meeting of the Association for Computational Linguistics (Volume 1: Long Papers)",
    month = jul,
    year = "2012",
    address = "Jeju Island, Korea",
    publisher = "Association for Computational Linguistics",
    url = "https://www.aclweb.org/anthology/P12-1002",
    pages = "11--21",
}
@inproceedings{kolachina-etal-2012-prediction,
    title = "Prediction of Learning Curves in Machine Translation",
    author = "Kolachina, Prasanth  and
      Cancedda, Nicola  and
      Dymetman, Marc  and
      Venkatapathy, Sriram",
    booktitle = "Proceedings of the 50th Annual Meeting of the Association for Computational Linguistics (Volume 1: Long Papers)",
    month = jul,
    year = "2012",
    address = "Jeju Island, Korea",
    publisher = "Association for Computational Linguistics",
    url = "https://www.aclweb.org/anthology/P12-1003",
    pages = "22--30",
}
@inproceedings{sim-2012-probabilistic,
    title = "Probabilistic Integration of Partial Lexical Information for Noise Robust Haptic Voice Recognition",
    author = "Sim, Khe Chai",
    booktitle = "Proceedings of the 50th Annual Meeting of the Association for Computational Linguistics (Volume 1: Long Papers)",
    month = jul,
    year = "2012",
    address = "Jeju Island, Korea",
    publisher = "Association for Computational Linguistics",
    url = "https://www.aclweb.org/anthology/P12-1004",
    pages = "31--39",
}
@inproceedings{lee-glass-2012-nonparametric,
    title = "A Nonparametric {B}ayesian Approach to Acoustic Model Discovery",
    author = "Lee, Chia-ying  and
      Glass, James",
    booktitle = "Proceedings of the 50th Annual Meeting of the Association for Computational Linguistics (Volume 1: Long Papers)",
    month = jul,
    year = "2012",
    address = "Jeju Island, Korea",
    publisher = "Association for Computational Linguistics",
    url = "https://www.aclweb.org/anthology/P12-1005",
    pages = "40--49",
}
@inproceedings{peng-etal-2012-automated,
    title = "Automated Essay Scoring Based on Finite State Transducer: towards {ASR} Transcription of Oral {E}nglish Speech",
    author = "Peng, Xingyuan  and
      Ke, Dengfeng  and
      Xu, Bo",
    booktitle = "Proceedings of the 50th Annual Meeting of the Association for Computational Linguistics (Volume 1: Long Papers)",
    month = jul,
    year = "2012",
    address = "Jeju Island, Korea",
    publisher = "Association for Computational Linguistics",
    url = "https://www.aclweb.org/anthology/P12-1006",
    pages = "50--59",
}
@inproceedings{feng-hirst-2012-text,
    title = "Text-level Discourse Parsing with Rich Linguistic Features",
    author = "Feng, Vanessa Wei  and
      Hirst, Graeme",
    booktitle = "Proceedings of the 50th Annual Meeting of the Association for Computational Linguistics (Volume 1: Long Papers)",
    month = jul,
    year = "2012",
    address = "Jeju Island, Korea",
    publisher = "Association for Computational Linguistics",
    url = "https://www.aclweb.org/anthology/P12-1007",
    pages = "60--68",
}
@inproceedings{zhou-xue-2012-pdtb,
    title = "{PDTB}-style Discourse Annotation of {C}hinese Text",
    author = "Zhou, Yuping  and
      Xue, Nianwen",
    booktitle = "Proceedings of the 50th Annual Meeting of the Association for Computational Linguistics (Volume 1: Long Papers)",
    month = jul,
    year = "2012",
    address = "Jeju Island, Korea",
    publisher = "Association for Computational Linguistics",
    url = "https://www.aclweb.org/anthology/P12-1008",
    pages = "69--77",
}
@inproceedings{nguyen-etal-2012-sits,
    title = "{SITS}: A Hierarchical Nonparametric Model using Speaker Identity for Topic Segmentation in Multiparty Conversations",
    author = "Nguyen, Viet-An  and
      Boyd-Graber, Jordan  and
      Resnik, Philip",
    booktitle = "Proceedings of the 50th Annual Meeting of the Association for Computational Linguistics (Volume 1: Long Papers)",
    month = jul,
    year = "2012",
    address = "Jeju Island, Korea",
    publisher = "Association for Computational Linguistics",
    url = "https://www.aclweb.org/anthology/P12-1009",
    pages = "78--87",
}
@inproceedings{kolomiyets-etal-2012-extracting,
    title = "Extracting Narrative Timelines as Temporal Dependency Structures",
    author = "Kolomiyets, Oleksandr  and
      Bethard, Steven  and
      Moens, Marie-Francine",
    booktitle = "Proceedings of the 50th Annual Meeting of the Association for Computational Linguistics (Volume 1: Long Papers)",
    month = jul,
    year = "2012",
    address = "Jeju Island, Korea",
    publisher = "Association for Computational Linguistics",
    url = "https://www.aclweb.org/anthology/P12-1010",
    pages = "88--97",
}
@inproceedings{chambers-2012-labeling,
    title = "Labeling Documents with Timestamps: Learning from their Time Expressions",
    author = "Chambers, Nathanael",
    booktitle = "Proceedings of the 50th Annual Meeting of the Association for Computational Linguistics (Volume 1: Long Papers)",
    month = jul,
    year = "2012",
    address = "Jeju Island, Korea",
    publisher = "Association for Computational Linguistics",
    url = "https://www.aclweb.org/anthology/P12-1011",
    pages = "98--106",
}
@inproceedings{garrido-etal-2012-temporally,
    title = "Temporally Anchored Relation Extraction",
    author = "Garrido, Guillermo  and
      Pe{\~n}as, Anselmo  and
      Cabaleiro, Bernardo  and
      Rodrigo, {\'A}lvaro",
    booktitle = "Proceedings of the 50th Annual Meeting of the Association for Computational Linguistics (Volume 1: Long Papers)",
    month = jul,
    year = "2012",
    address = "Jeju Island, Korea",
    publisher = "Association for Computational Linguistics",
    url = "https://www.aclweb.org/anthology/P12-1012",
    pages = "107--116",
}
@inproceedings{berant-etal-2012-efficient,
    title = "Efficient Tree-based Approximation for Entailment Graph Learning",
    author = "Berant, Jonathan  and
      Dagan, Ido  and
      Adler, Meni  and
      Goldberger, Jacob",
    booktitle = "Proceedings of the 50th Annual Meeting of the Association for Computational Linguistics (Volume 1: Long Papers)",
    month = jul,
    year = "2012",
    address = "Jeju Island, Korea",
    publisher = "Association for Computational Linguistics",
    url = "https://www.aclweb.org/anthology/P12-1013",
    pages = "117--125",
}
@inproceedings{branavan-etal-2012-learning,
    title = "Learning High-Level Planning from Text",
    author = "Branavan, S.R.K.  and
      Kushman, Nate  and
      Lei, Tao  and
      Barzilay, Regina",
    booktitle = "Proceedings of the 50th Annual Meeting of the Association for Computational Linguistics (Volume 1: Long Papers)",
    month = jul,
    year = "2012",
    address = "Jeju Island, Korea",
    publisher = "Association for Computational Linguistics",
    url = "https://www.aclweb.org/anthology/P12-1014",
    pages = "126--135",
}
@inproceedings{bruni-etal-2012-distributional,
    title = "Distributional Semantics in Technicolor",
    author = "Bruni, Elia  and
      Boleda, Gemma  and
      Baroni, Marco  and
      Tran, Nam-Khanh",
    booktitle = "Proceedings of the 50th Annual Meeting of the Association for Computational Linguistics (Volume 1: Long Papers)",
    month = jul,
    year = "2012",
    address = "Jeju Island, Korea",
    publisher = "Association for Computational Linguistics",
    url = "https://www.aclweb.org/anthology/P12-1015",
    pages = "136--145",
}
@inproceedings{green-denero-2012-class,
    title = "A Class-Based Agreement Model for Generating Accurately Inflected Translations",
    author = "Green, Spence  and
      DeNero, John",
    booktitle = "Proceedings of the 50th Annual Meeting of the Association for Computational Linguistics (Volume 1: Long Papers)",
    month = jul,
    year = "2012",
    address = "Jeju Island, Korea",
    publisher = "Association for Computational Linguistics",
    url = "https://www.aclweb.org/anthology/P12-1016",
    pages = "146--155",
}
@inproceedings{nuhn-etal-2012-deciphering,
    title = "Deciphering Foreign Language by Combining Language Models and Context Vectors",
    author = "Nuhn, Malte  and
      Mauser, Arne  and
      Ney, Hermann",
    booktitle = "Proceedings of the 50th Annual Meeting of the Association for Computational Linguistics (Volume 1: Long Papers)",
    month = jul,
    year = "2012",
    address = "Jeju Island, Korea",
    publisher = "Association for Computational Linguistics",
    url = "https://www.aclweb.org/anthology/P12-1017",
    pages = "156--164",
}
@inproceedings{neubig-etal-2012-machine,
    title = "Machine Translation without Words through Substring Alignment",
    author = "Neubig, Graham  and
      Watanabe, Taro  and
      Mori, Shinsuke  and
      Kawahara, Tatsuya",
    booktitle = "Proceedings of the 50th Annual Meeting of the Association for Computational Linguistics (Volume 1: Long Papers)",
    month = jul,
    year = "2012",
    address = "Jeju Island, Korea",
    publisher = "Association for Computational Linguistics",
    url = "https://www.aclweb.org/anthology/P12-1018",
    pages = "165--174",
}
@inproceedings{rastrow-etal-2012-fast,
    title = "Fast Syntactic Analysis for Statistical Language Modeling via Substructure Sharing and Uptraining",
    author = "Rastrow, Ariya  and
      Dredze, Mark  and
      Khudanpur, Sanjeev",
    booktitle = "Proceedings of the 50th Annual Meeting of the Association for Computational Linguistics (Volume 1: Long Papers)",
    month = jul,
    year = "2012",
    address = "Jeju Island, Korea",
    publisher = "Association for Computational Linguistics",
    url = "https://www.aclweb.org/anthology/P12-1019",
    pages = "175--183",
}
@inproceedings{elsner-etal-2012-bootstrapping,
    title = "Bootstrapping a Unified Model of Lexical and Phonetic Acquisition",
    author = "Elsner, Micha  and
      Goldwater, Sharon  and
      Eisenstein, Jacob",
    booktitle = "Proceedings of the 50th Annual Meeting of the Association for Computational Linguistics (Volume 1: Long Papers)",
    month = jul,
    year = "2012",
    address = "Jeju Island, Korea",
    publisher = "Association for Computational Linguistics",
    url = "https://www.aclweb.org/anthology/P12-1020",
    pages = "184--193",
}
@inproceedings{tang-etal-2012-discriminative,
    title = "Discriminative Pronunciation Modeling: A Large-Margin, Feature-Rich Approach",
    author = "Tang, Hao  and
      Keshet, Joseph  and
      Livescu, Karen",
    booktitle = "Proceedings of the 50th Annual Meeting of the Association for Computational Linguistics (Volume 1: Long Papers)",
    month = jul,
    year = "2012",
    address = "Jeju Island, Korea",
    publisher = "Association for Computational Linguistics",
    url = "https://www.aclweb.org/anthology/P12-1021",
    pages = "194--203",
}
@inproceedings{constant-etal-2012-discriminative,
    title = "Discriminative Strategies to Integrate Multiword Expression Recognition and Parsing",
    author = "Constant, Matthieu  and
      Sigogne, Anthony  and
      Watrin, Patrick",
    booktitle = "Proceedings of the 50th Annual Meeting of the Association for Computational Linguistics (Volume 1: Long Papers)",
    month = jul,
    year = "2012",
    address = "Jeju Island, Korea",
    publisher = "Association for Computational Linguistics",
    url = "https://www.aclweb.org/anthology/P12-1022",
    pages = "204--212",
}
@inproceedings{chen-etal-2012-utilizing,
    title = "Utilizing Dependency Language Models for Graph-based Dependency Parsing Models",
    author = "Chen, Wenliang  and
      Zhang, Min  and
      Li, Haizhou",
    booktitle = "Proceedings of the 50th Annual Meeting of the Association for Computational Linguistics (Volume 1: Long Papers)",
    month = jul,
    year = "2012",
    address = "Jeju Island, Korea",
    publisher = "Association for Computational Linguistics",
    url = "https://www.aclweb.org/anthology/P12-1023",
    pages = "213--222",
}
@inproceedings{cohen-etal-2012-spectral,
    title = "Spectral Learning of Latent-Variable {PCFG}s",
    author = "Cohen, Shay B.  and
      Stratos, Karl  and
      Collins, Michael  and
      Foster, Dean P.  and
      Ungar, Lyle",
    booktitle = "Proceedings of the 50th Annual Meeting of the Association for Computational Linguistics (Volume 1: Long Papers)",
    month = jul,
    year = "2012",
    address = "Jeju Island, Korea",
    publisher = "Association for Computational Linguistics",
    url = "https://www.aclweb.org/anthology/P12-1024",
    pages = "223--231",
}
@inproceedings{sun-wan-2012-reducing,
    title = "Reducing Approximation and Estimation Errors for {C}hinese Lexical Processing with Heterogeneous Annotations",
    author = "Sun, Weiwei  and
      Wan, Xiaojun",
    booktitle = "Proceedings of the 50th Annual Meeting of the Association for Computational Linguistics (Volume 1: Long Papers)",
    month = jul,
    year = "2012",
    address = "Jeju Island, Korea",
    publisher = "Association for Computational Linguistics",
    url = "https://www.aclweb.org/anthology/P12-1025",
    pages = "232--241",
}
@inproceedings{sun-uszkoreit-2012-capturing,
    title = "Capturing Paradigmatic and Syntagmatic Lexical Relations: Towards Accurate {C}hinese Part-of-Speech Tagging",
    author = "Sun, Weiwei  and
      Uszkoreit, Hans",
    booktitle = "Proceedings of the 50th Annual Meeting of the Association for Computational Linguistics (Volume 1: Long Papers)",
    month = jul,
    year = "2012",
    address = "Jeju Island, Korea",
    publisher = "Association for Computational Linguistics",
    url = "https://www.aclweb.org/anthology/P12-1026",
    pages = "242--252",
}
@inproceedings{sun-etal-2012-fast,
    title = "Fast Online Training with Frequency-Adaptive Learning Rates for {C}hinese Word Segmentation and New Word Detection",
    author = "Sun, Xu  and
      Wang, Houfeng  and
      Li, Wenjie",
    booktitle = "Proceedings of the 50th Annual Meeting of the Association for Computational Linguistics (Volume 1: Long Papers)",
    month = jul,
    year = "2012",
    address = "Jeju Island, Korea",
    publisher = "Association for Computational Linguistics",
    url = "https://www.aclweb.org/anthology/P12-1027",
    pages = "253--262",
}
@inproceedings{croce-etal-2012-verb,
    title = "Verb Classification using Distributional Similarity in Syntactic and Semantic Structures",
    author = "Croce, Danilo  and
      Moschitti, Alessandro  and
      Basili, Roberto  and
      Palmer, Martha",
    booktitle = "Proceedings of the 50th Annual Meeting of the Association for Computational Linguistics (Volume 1: Long Papers)",
    month = jul,
    year = "2012",
    address = "Jeju Island, Korea",
    publisher = "Association for Computational Linguistics",
    url = "https://www.aclweb.org/anthology/P12-1028",
    pages = "263--272",
}
@inproceedings{zhong-ng-2012-word,
    title = "Word Sense Disambiguation Improves Information Retrieval",
    author = "Zhong, Zhi  and
      Ng, Hwee Tou",
    booktitle = "Proceedings of the 50th Annual Meeting of the Association for Computational Linguistics (Volume 1: Long Papers)",
    month = jul,
    year = "2012",
    address = "Jeju Island, Korea",
    publisher = "Association for Computational Linguistics",
    url = "https://www.aclweb.org/anthology/P12-1029",
    pages = "273--282",
}
@inproceedings{stern-etal-2012-efficient,
    title = "Efficient Search for Transformation-based Inference",
    author = "Stern, Asher  and
      Stern, Roni  and
      Dagan, Ido  and
      Felner, Ariel",
    booktitle = "Proceedings of the 50th Annual Meeting of the Association for Computational Linguistics (Volume 1: Long Papers)",
    month = jul,
    year = "2012",
    address = "Jeju Island, Korea",
    publisher = "Association for Computational Linguistics",
    url = "https://www.aclweb.org/anthology/P12-1030",
    pages = "283--291",
}
@inproceedings{he-deng-2012-maximum,
    title = "Maximum Expected {BLEU} Training of Phrase and Lexicon Translation Models",
    author = "He, Xiaodong  and
      Deng, Li",
    booktitle = "Proceedings of the 50th Annual Meeting of the Association for Computational Linguistics (Volume 1: Long Papers)",
    month = jul,
    year = "2012",
    address = "Jeju Island, Korea",
    publisher = "Association for Computational Linguistics",
    url = "https://www.aclweb.org/anthology/P12-1031",
    pages = "292--301",
}
@inproceedings{liu-etal-2012-learning,
    title = "Learning Translation Consensus with Structured Label Propagation",
    author = "Liu, Shujie  and
      Li, Chi-Ho  and
      Li, Mu  and
      Zhou, Ming",
    booktitle = "Proceedings of the 50th Annual Meeting of the Association for Computational Linguistics (Volume 1: Long Papers)",
    month = jul,
    year = "2012",
    address = "Jeju Island, Korea",
    publisher = "Association for Computational Linguistics",
    url = "https://www.aclweb.org/anthology/P12-1032",
    pages = "302--310",
}
@inproceedings{vaswani-etal-2012-smaller,
    title = "Smaller Alignment Models for Better Translations: Unsupervised Word Alignment with the l0-norm",
    author = "Vaswani, Ashish  and
      Huang, Liang  and
      Chiang, David",
    booktitle = "Proceedings of the 50th Annual Meeting of the Association for Computational Linguistics (Volume 1: Long Papers)",
    month = jul,
    year = "2012",
    address = "Jeju Island, Korea",
    publisher = "Association for Computational Linguistics",
    url = "https://www.aclweb.org/anthology/P12-1033",
    pages = "311--319",
}
@inproceedings{mukherjee-liu-2012-modeling,
    title = "Modeling Review Comments",
    author = "Mukherjee, Arjun  and
      Liu, Bing",
    booktitle = "Proceedings of the 50th Annual Meeting of the Association for Computational Linguistics (Volume 1: Long Papers)",
    month = jul,
    year = "2012",
    address = "Jeju Island, Korea",
    publisher = "Association for Computational Linguistics",
    url = "https://www.aclweb.org/anthology/P12-1034",
    pages = "320--329",
}
@inproceedings{celikyilmaz-hakkani-tur-2012-joint,
    title = "A Joint Model for Discovery of Aspects in Utterances",
    author = "Celikyilmaz, Asli  and
      Hakkani-Tur, Dilek",
    booktitle = "Proceedings of the 50th Annual Meeting of the Association for Computational Linguistics (Volume 1: Long Papers)",
    month = jul,
    year = "2012",
    address = "Jeju Island, Korea",
    publisher = "Association for Computational Linguistics",
    url = "https://www.aclweb.org/anthology/P12-1035",
    pages = "330--338",
}
@inproceedings{mukherjee-liu-2012-aspect,
    title = "Aspect Extraction through Semi-Supervised Modeling",
    author = "Mukherjee, Arjun  and
      Liu, Bing",
    booktitle = "Proceedings of the 50th Annual Meeting of the Association for Computational Linguistics (Volume 1: Long Papers)",
    month = jul,
    year = "2012",
    address = "Jeju Island, Korea",
    publisher = "Association for Computational Linguistics",
    url = "https://www.aclweb.org/anthology/P12-1036",
    pages = "339--348",
}
@inproceedings{raghavan-etal-2012-learning,
    title = "Learning to {``}Read Between the Lines{''} using {B}ayesian Logic Programs",
    author = "Raghavan, Sindhu  and
      Mooney, Raymond  and
      Ku, Hyeonseo",
    booktitle = "Proceedings of the 50th Annual Meeting of the Association for Computational Linguistics (Volume 1: Long Papers)",
    month = jul,
    year = "2012",
    address = "Jeju Island, Korea",
    publisher = "Association for Computational Linguistics",
    url = "https://www.aclweb.org/anthology/P12-1037",
    pages = "349--358",
}
@inproceedings{kuznetsova-etal-2012-collective,
    title = "Collective Generation of Natural Image Descriptions",
    author = "Kuznetsova, Polina  and
      Ordonez, Vicente  and
      Berg, Alexander  and
      Berg, Tamara  and
      Choi, Yejin",
    booktitle = "Proceedings of the 50th Annual Meeting of the Association for Computational Linguistics (Volume 1: Long Papers)",
    month = jul,
    year = "2012",
    address = "Jeju Island, Korea",
    publisher = "Association for Computational Linguistics",
    url = "https://www.aclweb.org/anthology/P12-1038",
    pages = "359--368",
}
@inproceedings{konstas-lapata-2012-concept,
    title = "Concept-to-text Generation via Discriminative Reranking",
    author = "Konstas, Ioannis  and
      Lapata, Mirella",
    booktitle = "Proceedings of the 50th Annual Meeting of the Association for Computational Linguistics (Volume 1: Long Papers)",
    month = jul,
    year = "2012",
    address = "Jeju Island, Korea",
    publisher = "Association for Computational Linguistics",
    url = "https://www.aclweb.org/anthology/P12-1039",
    pages = "369--378",
}
@inproceedings{wick-etal-2012-discriminative,
    title = "A Discriminative Hierarchical Model for Fast Coreference at Large Scale",
    author = "Wick, Michael  and
      Singh, Sameer  and
      McCallum, Andrew",
    booktitle = "Proceedings of the 50th Annual Meeting of the Association for Computational Linguistics (Volume 1: Long Papers)",
    month = jul,
    year = "2012",
    address = "Jeju Island, Korea",
    publisher = "Association for Computational Linguistics",
    url = "https://www.aclweb.org/anthology/P12-1040",
    pages = "379--388",
}
@inproceedings{bansal-klein-2012-coreference,
    title = "Coreference Semantics from Web Features",
    author = "Bansal, Mohit  and
      Klein, Dan",
    booktitle = "Proceedings of the 50th Annual Meeting of the Association for Computational Linguistics (Volume 1: Long Papers)",
    month = jul,
    year = "2012",
    address = "Jeju Island, Korea",
    publisher = "Association for Computational Linguistics",
    url = "https://www.aclweb.org/anthology/P12-1041",
    pages = "389--398",
}
@inproceedings{abu-jbara-etal-2012-subgroup,
    title = "Subgroup Detection in Ideological Discussions",
    author = "Abu-Jbara, Amjad  and
      Dasigi, Pradeep  and
      Diab, Mona  and
      Radev, Dragomir",
    booktitle = "Proceedings of the 50th Annual Meeting of the Association for Computational Linguistics (Volume 1: Long Papers)",
    month = jul,
    year = "2012",
    address = "Jeju Island, Korea",
    publisher = "Association for Computational Linguistics",
    url = "https://www.aclweb.org/anthology/P12-1042",
    pages = "399--409",
}
@inproceedings{li-etal-2012-cross,
    title = "Cross-Domain Co-Extraction of Sentiment and Topic Lexicons",
    author = "Li, Fangtao  and
      Pan, Sinno Jialin  and
      Jin, Ou  and
      Yang, Qiang  and
      Zhu, Xiaoyan",
    booktitle = "Proceedings of the 50th Annual Meeting of the Association for Computational Linguistics (Volume 1: Long Papers)",
    month = jul,
    year = "2012",
    address = "Jeju Island, Korea",
    publisher = "Association for Computational Linguistics",
    url = "https://www.aclweb.org/anthology/P12-1043",
    pages = "410--419",
}
@inproceedings{lippincott-etal-2012-learning,
    title = "Learning Syntactic Verb Frames using Graphical Models",
    author = "Lippincott, Thomas  and
      Korhonen, Anna  and
      {\'O} S{\'e}aghdha, Diarmuid",
    booktitle = "Proceedings of the 50th Annual Meeting of the Association for Computational Linguistics (Volume 1: Long Papers)",
    month = jul,
    year = "2012",
    address = "Jeju Island, Korea",
    publisher = "Association for Computational Linguistics",
    url = "https://www.aclweb.org/anthology/P12-1044",
    pages = "420--429",
}
@inproceedings{chen-2012-fast,
    title = "Fast Online Lexicon Learning for Grounded Language Acquisition",
    author = "Chen, David",
    booktitle = "Proceedings of the 50th Annual Meeting of the Association for Computational Linguistics (Volume 1: Long Papers)",
    month = jul,
    year = "2012",
    address = "Jeju Island, Korea",
    publisher = "Association for Computational Linguistics",
    url = "https://www.aclweb.org/anthology/P12-1045",
    pages = "430--439",
}
@inproceedings{shindo-etal-2012-bayesian,
    title = "{B}ayesian Symbol-Refined Tree Substitution Grammars for Syntactic Parsing",
    author = "Shindo, Hiroyuki  and
      Miyao, Yusuke  and
      Fujino, Akinori  and
      Nagata, Masaaki",
    booktitle = "Proceedings of the 50th Annual Meeting of the Association for Computational Linguistics (Volume 1: Long Papers)",
    month = jul,
    year = "2012",
    address = "Jeju Island, Korea",
    publisher = "Association for Computational Linguistics",
    url = "https://www.aclweb.org/anthology/P12-1046",
    pages = "440--448",
}
@inproceedings{bu-etal-2012-string,
    title = "String Re-writing Kernel",
    author = "Bu, Fan  and
      Li, Hang  and
      Zhu, Xiaoyan",
    booktitle = "Proceedings of the 50th Annual Meeting of the Association for Computational Linguistics (Volume 1: Long Papers)",
    month = jul,
    year = "2012",
    address = "Jeju Island, Korea",
    publisher = "Association for Computational Linguistics",
    url = "https://www.aclweb.org/anthology/P12-1047",
    pages = "449--458",
}
@inproceedings{su-etal-2012-translation,
    title = "Translation Model Adaptation for Statistical Machine Translation with Monolingual Topic Information",
    author = "Su, Jinsong  and
      Wu, Hua  and
      Wang, Haifeng  and
      Chen, Yidong  and
      Shi, Xiaodong  and
      Dong, Huailin  and
      Liu, Qun",
    booktitle = "Proceedings of the 50th Annual Meeting of the Association for Computational Linguistics (Volume 1: Long Papers)",
    month = jul,
    year = "2012",
    address = "Jeju Island, Korea",
    publisher = "Association for Computational Linguistics",
    url = "https://www.aclweb.org/anthology/P12-1048",
    pages = "459--468",
}
@inproceedings{sajjad-etal-2012-statistical,
    title = "A Statistical Model for Unsupervised and Semi-supervised Transliteration Mining",
    author = "Sajjad, Hassan  and
      Fraser, Alexander  and
      Schmid, Helmut",
    booktitle = "Proceedings of the 50th Annual Meeting of the Association for Computational Linguistics (Volume 1: Long Papers)",
    month = jul,
    year = "2012",
    address = "Jeju Island, Korea",
    publisher = "Association for Computational Linguistics",
    url = "https://www.aclweb.org/anthology/P12-1049",
    pages = "469--477",
}
@inproceedings{bisazza-federico-2012-modified,
    title = "Modified Distortion Matrices for Phrase-Based Statistical Machine Translation",
    author = "Bisazza, Arianna  and
      Federico, Marcello",
    booktitle = "Proceedings of the 50th Annual Meeting of the Association for Computational Linguistics (Volume 1: Long Papers)",
    month = jul,
    year = "2012",
    address = "Jeju Island, Korea",
    publisher = "Association for Computational Linguistics",
    url = "https://www.aclweb.org/anthology/P12-1050",
    pages = "478--487",
}
@inproceedings{jones-etal-2012-semantic,
    title = "Semantic Parsing with {B}ayesian Tree Transducers",
    author = "Jones, Bevan  and
      Johnson, Mark  and
      Goldwater, Sharon",
    booktitle = "Proceedings of the 50th Annual Meeting of the Association for Computational Linguistics (Volume 1: Long Papers)",
    month = jul,
    year = "2012",
    address = "Jeju Island, Korea",
    publisher = "Association for Computational Linguistics",
    url = "https://www.aclweb.org/anthology/P12-1051",
    pages = "488--496",
}
@inproceedings{ng-curran-2012-dependency,
    title = "Dependency Hashing for n-best {CCG} Parsing",
    author = "Ng, Dominick  and
      Curran, James R.",
    booktitle = "Proceedings of the 50th Annual Meeting of the Association for Computational Linguistics (Volume 1: Long Papers)",
    month = jul,
    year = "2012",
    address = "Jeju Island, Korea",
    publisher = "Association for Computational Linguistics",
    url = "https://www.aclweb.org/anthology/P12-1052",
    pages = "497--505",
}
@inproceedings{maletti-engelfriet-2012-strong,
    title = "Strong Lexicalization of Tree Adjoining Grammars",
    author = "Maletti, Andreas  and
      Engelfriet, Joost",
    booktitle = "Proceedings of the 50th Annual Meeting of the Association for Computational Linguistics (Volume 1: Long Papers)",
    month = jul,
    year = "2012",
    address = "Jeju Island, Korea",
    publisher = "Association for Computational Linguistics",
    url = "https://www.aclweb.org/anthology/P12-1053",
    pages = "506--515",
}
@inproceedings{yan-etal-2012-tweet,
    title = "Tweet Recommendation with Graph Co-Ranking",
    author = "Yan, Rui  and
      Lapata, Mirella  and
      Li, Xiaoming",
    booktitle = "Proceedings of the 50th Annual Meeting of the Association for Computational Linguistics (Volume 1: Long Papers)",
    month = jul,
    year = "2012",
    address = "Jeju Island, Korea",
    publisher = "Association for Computational Linguistics",
    url = "https://www.aclweb.org/anthology/P12-1054",
    pages = "516--525",
}
@inproceedings{liu-etal-2012-joint,
    title = "Joint Inference of Named Entity Recognition and Normalization for Tweets",
    author = "Liu, Xiaohua  and
      Zhou, Ming  and
      Zhou, Xiangyang  and
      Fu, Zhongyang  and
      Wei, Furu",
    booktitle = "Proceedings of the 50th Annual Meeting of the Association for Computational Linguistics (Volume 1: Long Papers)",
    month = jul,
    year = "2012",
    address = "Jeju Island, Korea",
    publisher = "Association for Computational Linguistics",
    url = "https://www.aclweb.org/anthology/P12-1055",
    pages = "526--535",
}
@inproceedings{diao-etal-2012-finding,
    title = "Finding Bursty Topics from Microblogs",
    author = "Diao, Qiming  and
      Jiang, Jing  and
      Zhu, Feida  and
      Lim, Ee-Peng",
    booktitle = "Proceedings of the 50th Annual Meeting of the Association for Computational Linguistics (Volume 1: Long Papers)",
    month = jul,
    year = "2012",
    address = "Jeju Island, Korea",
    publisher = "Association for Computational Linguistics",
    url = "https://www.aclweb.org/anthology/P12-1056",
    pages = "536--544",
}
@inproceedings{druck-pang-2012-spice,
    title = "Spice it up? Mining Refinements to Online Instructions from User Generated Content",
    author = "Druck, Gregory  and
      Pang, Bo",
    booktitle = "Proceedings of the 50th Annual Meeting of the Association for Computational Linguistics (Volume 1: Long Papers)",
    month = jul,
    year = "2012",
    address = "Jeju Island, Korea",
    publisher = "Association for Computational Linguistics",
    url = "https://www.aclweb.org/anthology/P12-1057",
    pages = "545--553",
}
@inproceedings{qu-liu-2012-sentence,
    title = "Sentence Dependency Tagging in Online Question Answering Forums",
    author = "Qu, Zhonghua  and
      Liu, Yang",
    booktitle = "Proceedings of the 50th Annual Meeting of the Association for Computational Linguistics (Volume 1: Long Papers)",
    month = jul,
    year = "2012",
    address = "Jeju Island, Korea",
    publisher = "Association for Computational Linguistics",
    url = "https://www.aclweb.org/anthology/P12-1058",
    pages = "554--562",
}
@inproceedings{pantel-etal-2012-mining,
    title = "Mining Entity Types from Query Logs via User Intent Modeling",
    author = "Pantel, Patrick  and
      Lin, Thomas  and
      Gamon, Michael",
    booktitle = "Proceedings of the 50th Annual Meeting of the Association for Computational Linguistics (Volume 1: Long Papers)",
    month = jul,
    year = "2012",
    address = "Jeju Island, Korea",
    publisher = "Association for Computational Linguistics",
    url = "https://www.aclweb.org/anthology/P12-1059",
    pages = "563--571",
}
@inproceedings{meng-etal-2012-cross,
    title = "Cross-Lingual Mixture Model for Sentiment Classification",
    author = "Meng, Xinfan  and
      Wei, Furu  and
      Liu, Xiaohua  and
      Zhou, Ming  and
      Xu, Ge  and
      Wang, Houfeng",
    booktitle = "Proceedings of the 50th Annual Meeting of the Association for Computational Linguistics (Volume 1: Long Papers)",
    month = jul,
    year = "2012",
    address = "Jeju Island, Korea",
    publisher = "Association for Computational Linguistics",
    url = "https://www.aclweb.org/anthology/P12-1060",
    pages = "572--581",
}
@inproceedings{chan-etal-2012-community,
    title = "Community Answer Summarization for Multi-Sentence Question with Group {L}1 Regularization",
    author = "Chan, Wen  and
      Zhou, Xiangdong  and
      Wang, Wei  and
      Chua, Tat-Seng",
    booktitle = "Proceedings of the 50th Annual Meeting of the Association for Computational Linguistics (Volume 1: Long Papers)",
    month = jul,
    year = "2012",
    address = "Jeju Island, Korea",
    publisher = "Association for Computational Linguistics",
    url = "https://www.aclweb.org/anthology/P12-1061",
    pages = "582--591",
}
@inproceedings{gardent-narayan-2012-error,
    title = "Error Mining on Dependency Trees",
    author = "Gardent, Claire  and
      Narayan, Shashi",
    booktitle = "Proceedings of the 50th Annual Meeting of the Association for Computational Linguistics (Volume 1: Long Papers)",
    month = jul,
    year = "2012",
    address = "Jeju Island, Korea",
    publisher = "Association for Computational Linguistics",
    url = "https://www.aclweb.org/anthology/P12-1062",
    pages = "592--600",
}
@inproceedings{zweig-etal-2012-computational,
    title = "Computational Approaches to Sentence Completion",
    author = "Zweig, Geoffrey  and
      Platt, John C.  and
      Meek, Christopher  and
      Burges, Christopher J.C.  and
      Yessenalina, Ainur  and
      Liu, Qiang",
    booktitle = "Proceedings of the 50th Annual Meeting of the Association for Computational Linguistics (Volume 1: Long Papers)",
    month = jul,
    year = "2012",
    address = "Jeju Island, Korea",
    publisher = "Association for Computational Linguistics",
    url = "https://www.aclweb.org/anthology/P12-1063",
    pages = "601--610",
}
@inproceedings{huang-etal-2012-iterative,
    title = "Iterative {V}iterbi {A}* Algorithm for K-Best Sequential Decoding",
    author = "Huang, Zhiheng  and
      Chang, Yi  and
      Long, Bo  and
      Crespo, Jean-Francois  and
      Dong, Anlei  and
      Keerthi, Sathiya  and
      Wu, Su-Lin",
    booktitle = "Proceedings of the 50th Annual Meeting of the Association for Computational Linguistics (Volume 1: Long Papers)",
    month = jul,
    year = "2012",
    address = "Jeju Island, Korea",
    publisher = "Association for Computational Linguistics",
    url = "https://www.aclweb.org/anthology/P12-1064",
    pages = "611--619",
}
@inproceedings{whitney-sarkar-2012-bootstrapping,
    title = "Bootstrapping via Graph Propagation",
    author = "Whitney, Max  and
      Sarkar, Anoop",
    booktitle = "Proceedings of the 50th Annual Meeting of the Association for Computational Linguistics (Volume 1: Long Papers)",
    month = jul,
    year = "2012",
    address = "Jeju Island, Korea",
    publisher = "Association for Computational Linguistics",
    url = "https://www.aclweb.org/anthology/P12-1065",
    pages = "620--628",
}
@inproceedings{naseem-etal-2012-selective,
    title = "Selective Sharing for Multilingual Dependency Parsing",
    author = "Naseem, Tahira  and
      Barzilay, Regina  and
      Globerson, Amir",
    booktitle = "Proceedings of the 50th Annual Meeting of the Association for Computational Linguistics (Volume 1: Long Papers)",
    month = jul,
    year = "2012",
    address = "Jeju Island, Korea",
    publisher = "Association for Computational Linguistics",
    url = "https://www.aclweb.org/anthology/P12-1066",
    pages = "629--637",
}
@inproceedings{wilson-2012-creation,
    title = "The Creation of a Corpus of {E}nglish Metalanguage",
    author = "Wilson, Shomir",
    booktitle = "Proceedings of the 50th Annual Meeting of the Association for Computational Linguistics (Volume 1: Long Papers)",
    month = jul,
    year = "2012",
    address = "Jeju Island, Korea",
    publisher = "Association for Computational Linguistics",
    url = "https://www.aclweb.org/anthology/P12-1067",
    pages = "638--646",
}
@inproceedings{titov-klementiev-2012-crosslingual,
    title = "Crosslingual Induction of Semantic Roles",
    author = "Titov, Ivan  and
      Klementiev, Alexandre",
    booktitle = "Proceedings of the 50th Annual Meeting of the Association for Computational Linguistics (Volume 1: Long Papers)",
    month = jul,
    year = "2012",
    address = "Jeju Island, Korea",
    publisher = "Association for Computational Linguistics",
    url = "https://www.aclweb.org/anthology/P12-1068",
    pages = "647--656",
}
@inproceedings{hayashi-etal-2012-head,
    title = "Head-driven Transition-based Parsing with Top-down Prediction",
    author = "Hayashi, Katsuhiko  and
      Watanabe, Taro  and
      Asahara, Masayuki  and
      Matsumoto, Yuji",
    booktitle = "Proceedings of the 50th Annual Meeting of the Association for Computational Linguistics (Volume 1: Long Papers)",
    month = jul,
    year = "2012",
    address = "Jeju Island, Korea",
    publisher = "Association for Computational Linguistics",
    url = "https://www.aclweb.org/anthology/P12-1069",
    pages = "657--665",
}
@inproceedings{kanazawa-salvati-2012-mix,
    title = "{MIX} Is Not a Tree-Adjoining Language",
    author = "Kanazawa, Makoto  and
      Salvati, Sylvain",
    booktitle = "Proceedings of the 50th Annual Meeting of the Association for Computational Linguistics (Volume 1: Long Papers)",
    month = jul,
    year = "2012",
    address = "Jeju Island, Korea",
    publisher = "Association for Computational Linguistics",
    url = "https://www.aclweb.org/anthology/P12-1070",
    pages = "666--674",
}
@inproceedings{li-etal-2012-exploiting,
    title = "Exploiting Multiple Treebanks for Parsing with Quasi-synchronous Grammars",
    author = "Li, Zhenghua  and
      Liu, Ting  and
      Che, Wanxiang",
    booktitle = "Proceedings of the 50th Annual Meeting of the Association for Computational Linguistics (Volume 1: Long Papers)",
    month = jul,
    year = "2012",
    address = "Jeju Island, Korea",
    publisher = "Association for Computational Linguistics",
    url = "https://www.aclweb.org/anthology/P12-1071",
    pages = "675--684",
}
@inproceedings{yogatama-etal-2012-probabilistic,
    title = "A Probabilistic Model for Canonicalizing Named Entity Mentions",
    author = "Yogatama, Dani  and
      Sim, Yanchuan  and
      Smith, Noah A.",
    booktitle = "Proceedings of the 50th Annual Meeting of the Association for Computational Linguistics (Volume 1: Long Papers)",
    month = jul,
    year = "2012",
    address = "Jeju Island, Korea",
    publisher = "Association for Computational Linguistics",
    url = "https://www.aclweb.org/anthology/P12-1072",
    pages = "685--693",
}
@inproceedings{kim-etal-2012-multilingual,
    title = "Multilingual Named Entity Recognition using Parallel Data and Metadata from {W}ikipedia",
    author = "Kim, Sungchul  and
      Toutanova, Kristina  and
      Yu, Hwanjo",
    booktitle = "Proceedings of the 50th Annual Meeting of the Association for Computational Linguistics (Volume 1: Long Papers)",
    month = jul,
    year = "2012",
    address = "Jeju Island, Korea",
    publisher = "Association for Computational Linguistics",
    url = "https://www.aclweb.org/anthology/P12-1073",
    pages = "694--702",
}
@inproceedings{ozbal-strapparava-2012-computational,
    title = "A Computational Approach to the Automation of Creative Naming",
    author = {{\"O}zbal, G{\"o}zde  and
      Strapparava, Carlo},
    booktitle = "Proceedings of the 50th Annual Meeting of the Association for Computational Linguistics (Volume 1: Long Papers)",
    month = jul,
    year = "2012",
    address = "Jeju Island, Korea",
    publisher = "Association for Computational Linguistics",
    url = "https://www.aclweb.org/anthology/P12-1074",
    pages = "703--711",
}
@inproceedings{yao-etal-2012-unsupervised,
    title = "Unsupervised Relation Discovery with Sense Disambiguation",
    author = "Yao, Limin  and
      Riedel, Sebastian  and
      McCallum, Andrew",
    booktitle = "Proceedings of the 50th Annual Meeting of the Association for Computational Linguistics (Volume 1: Long Papers)",
    month = jul,
    year = "2012",
    address = "Jeju Island, Korea",
    publisher = "Association for Computational Linguistics",
    url = "https://www.aclweb.org/anthology/P12-1075",
    pages = "712--720",
}
@inproceedings{takamatsu-etal-2012-reducing,
    title = "Reducing Wrong Labels in Distant Supervision for Relation Extraction",
    author = "Takamatsu, Shingo  and
      Sato, Issei  and
      Nakagawa, Hiroshi",
    booktitle = "Proceedings of the 50th Annual Meeting of the Association for Computational Linguistics (Volume 1: Long Papers)",
    month = jul,
    year = "2012",
    address = "Jeju Island, Korea",
    publisher = "Association for Computational Linguistics",
    url = "https://www.aclweb.org/anthology/P12-1076",
    pages = "721--729",
}
@inproceedings{kessler-etal-2012-finding,
    title = "Finding Salient Dates for Building Thematic Timelines",
    author = "Kessler, R{\'e}my  and
      Tannier, Xavier  and
      Hag{\`e}ge, Caroline  and
      Moriceau, V{\'e}ronique  and
      Bittar, Andr{\'e}",
    booktitle = "Proceedings of the 50th Annual Meeting of the Association for Computational Linguistics (Volume 1: Long Papers)",
    month = jul,
    year = "2012",
    address = "Jeju Island, Korea",
    publisher = "Association for Computational Linguistics",
    url = "https://www.aclweb.org/anthology/P12-1077",
    pages = "730--739",
}
@inproceedings{wang-etal-2012-historical,
    title = "Historical Analysis of Legal Opinions with a Sparse Mixed-Effects Latent Variable Model",
    author = "Wang, William Yang  and
      Mayfield, Elijah  and
      Naidu, Suresh  and
      Dittmar, Jeremiah",
    booktitle = "Proceedings of the 50th Annual Meeting of the Association for Computational Linguistics (Volume 1: Long Papers)",
    month = jul,
    year = "2012",
    address = "Jeju Island, Korea",
    publisher = "Association for Computational Linguistics",
    url = "https://www.aclweb.org/anthology/P12-1078",
    pages = "740--749",
}
@inproceedings{xiao-etal-2012-topic,
    title = "A Topic Similarity Model for Hierarchical Phrase-based Translation",
    author = "Xiao, Xinyan  and
      Xiong, Deyi  and
      Zhang, Min  and
      Liu, Qun  and
      Lin, Shouxun",
    booktitle = "Proceedings of the 50th Annual Meeting of the Association for Computational Linguistics (Volume 1: Long Papers)",
    month = jul,
    year = "2012",
    address = "Jeju Island, Korea",
    publisher = "Association for Computational Linguistics",
    url = "https://www.aclweb.org/anthology/P12-1079",
    pages = "750--758",
}
@inproceedings{moschitti-etal-2012-modeling,
    title = "Modeling Topic Dependencies in Hierarchical Text Categorization",
    author = "Moschitti, Alessandro  and
      Ju, Qi  and
      Johansson, Richard",
    booktitle = "Proceedings of the 50th Annual Meeting of the Association for Computational Linguistics (Volume 1: Long Papers)",
    month = jul,
    year = "2012",
    address = "Jeju Island, Korea",
    publisher = "Association for Computational Linguistics",
    url = "https://www.aclweb.org/anthology/P12-1080",
    pages = "759--767",
}
@inproceedings{pitler-2012-attacking,
    title = "Attacking Parsing Bottlenecks with Unlabeled Data and Relevant Factorizations",
    author = "Pitler, Emily",
    booktitle = "Proceedings of the 50th Annual Meeting of the Association for Computational Linguistics (Volume 1: Long Papers)",
    month = jul,
    year = "2012",
    address = "Jeju Island, Korea",
    publisher = "Association for Computational Linguistics",
    url = "https://www.aclweb.org/anthology/P12-1081",
    pages = "768--776",
}
@inproceedings{mirroshandel-etal-2012-semi,
    title = "Semi-supervised Dependency Parsing using Lexical Affinities",
    author = "Mirroshandel, Seyed Abolghasem  and
      Nasr, Alexis  and
      Le Roux, Joseph",
    booktitle = "Proceedings of the 50th Annual Meeting of the Association for Computational Linguistics (Volume 1: Long Papers)",
    month = jul,
    year = "2012",
    address = "Jeju Island, Korea",
    publisher = "Association for Computational Linguistics",
    url = "https://www.aclweb.org/anthology/P12-1082",
    pages = "777--785",
}
@inproceedings{yang-xue-2012-chinese,
    title = "{C}hinese Comma Disambiguation for Discourse Analysis",
    author = "Yang, Yaqin  and
      Xue, Nianwen",
    booktitle = "Proceedings of the 50th Annual Meeting of the Association for Computational Linguistics (Volume 1: Long Papers)",
    month = jul,
    year = "2012",
    address = "Jeju Island, Korea",
    publisher = "Association for Computational Linguistics",
    url = "https://www.aclweb.org/anthology/P12-1083",
    pages = "786--794",
}
@inproceedings{markert-etal-2012-collective,
    title = "Collective Classification for Fine-grained Information Status",
    author = "Markert, Katja  and
      Hou, Yufang  and
      Strube, Michael",
    booktitle = "Proceedings of the 50th Annual Meeting of the Association for Computational Linguistics (Volume 1: Long Papers)",
    month = jul,
    year = "2012",
    address = "Jeju Island, Korea",
    publisher = "Association for Computational Linguistics",
    url = "https://www.aclweb.org/anthology/P12-1084",
    pages = "795--804",
}
@inproceedings{mauge-etal-2012-structuring,
    title = "Structuring E-Commerce Inventory",
    author = "Mauge, Karin  and
      Rohanimanesh, Khash  and
      Ruvini, Jean-David",
    booktitle = "Proceedings of the 50th Annual Meeting of the Association for Computational Linguistics (Volume 1: Long Papers)",
    month = jul,
    year = "2012",
    address = "Jeju Island, Korea",
    publisher = "Association for Computational Linguistics",
    url = "https://www.aclweb.org/anthology/P12-1085",
    pages = "805--814",
}
@inproceedings{davis-etal-2012-named,
    title = "Named Entity Disambiguation in Streaming Data",
    author = "Davis, Alexandre  and
      Veloso, Adriano  and
      Soares, Altigran  and
      Laender, Alberto  and
      Meira Jr., Wagner",
    booktitle = "Proceedings of the 50th Annual Meeting of the Association for Computational Linguistics (Volume 1: Long Papers)",
    month = jul,
    year = "2012",
    address = "Jeju Island, Korea",
    publisher = "Association for Computational Linguistics",
    url = "https://www.aclweb.org/anthology/P12-1086",
    pages = "815--824",
}
@inproceedings{zhang-etal-2012-big,
    title = "Big Data versus the Crowd: Looking for Relationships in All the Right Places",
    author = "Zhang, Ce  and
      Niu, Feng  and
      R{\'e}, Christopher  and
      Shavlik, Jude",
    booktitle = "Proceedings of the 50th Annual Meeting of the Association for Computational Linguistics (Volume 1: Long Papers)",
    month = jul,
    year = "2012",
    address = "Jeju Island, Korea",
    publisher = "Association for Computational Linguistics",
    url = "https://www.aclweb.org/anthology/P12-1087",
    pages = "825--834",
}
@inproceedings{lu-roth-2012-automatic,
    title = "Automatic Event Extraction with Structured Preference Modeling",
    author = "Lu, Wei  and
      Roth, Dan",
    booktitle = "Proceedings of the 50th Annual Meeting of the Association for Computational Linguistics (Volume 1: Long Papers)",
    month = jul,
    year = "2012",
    address = "Jeju Island, Korea",
    publisher = "Association for Computational Linguistics",
    url = "https://www.aclweb.org/anthology/P12-1088",
    pages = "835--844",
}
@inproceedings{minkov-zettlemoyer-2012-discriminative,
    title = "Discriminative Learning for Joint Template Filling",
    author = "Minkov, Einat  and
      Zettlemoyer, Luke",
    booktitle = "Proceedings of the 50th Annual Meeting of the Association for Computational Linguistics (Volume 1: Long Papers)",
    month = jul,
    year = "2012",
    address = "Jeju Island, Korea",
    publisher = "Association for Computational Linguistics",
    url = "https://www.aclweb.org/anthology/P12-1089",
    pages = "845--853",
}
@inproceedings{falk-etal-2012-classifying,
    title = "Classifying {F}rench Verbs Using {F}rench and {E}nglish Lexical Resources",
    author = "Falk, Ingrid  and
      Gardent, Claire  and
      Lamirel, Jean-Charles",
    booktitle = "Proceedings of the 50th Annual Meeting of the Association for Computational Linguistics (Volume 1: Long Papers)",
    month = jul,
    year = "2012",
    address = "Jeju Island, Korea",
    publisher = "Association for Computational Linguistics",
    url = "https://www.aclweb.org/anthology/P12-1090",
    pages = "854--863",
}
@inproceedings{guo-diab-2012-modeling,
    title = "Modeling Sentences in the Latent Space",
    author = "Guo, Weiwei  and
      Diab, Mona",
    booktitle = "Proceedings of the 50th Annual Meeting of the Association for Computational Linguistics (Volume 1: Long Papers)",
    month = jul,
    year = "2012",
    address = "Jeju Island, Korea",
    publisher = "Association for Computational Linguistics",
    url = "https://www.aclweb.org/anthology/P12-1091",
    pages = "864--872",
}
@inproceedings{huang-etal-2012-improving,
    title = "Improving Word Representations via Global Context and Multiple Word Prototypes",
    author = "Huang, Eric  and
      Socher, Richard  and
      Manning, Christopher  and
      Ng, Andrew",
    booktitle = "Proceedings of the 50th Annual Meeting of the Association for Computational Linguistics (Volume 1: Long Papers)",
    month = jul,
    year = "2012",
    address = "Jeju Island, Korea",
    publisher = "Association for Computational Linguistics",
    url = "https://www.aclweb.org/anthology/P12-1092",
    pages = "873--882",
}
@inproceedings{johnson-etal-2012-exploiting,
    title = "Exploiting Social Information in Grounded Language Learning via Grammatical Reduction",
    author = "Johnson, Mark  and
      Demuth, Katherine  and
      Frank, Michael",
    booktitle = "Proceedings of the 50th Annual Meeting of the Association for Computational Linguistics (Volume 1: Long Papers)",
    month = jul,
    year = "2012",
    address = "Jeju Island, Korea",
    publisher = "Association for Computational Linguistics",
    url = "https://www.aclweb.org/anthology/P12-1093",
    pages = "883--891",
}
@inproceedings{danescu-niculescu-mizil-etal-2012-hello,
    title = "You Had Me at Hello: How Phrasing Affects Memorability",
    author = "Danescu-Niculescu-Mizil, Cristian  and
      Cheng, Justin  and
      Kleinberg, Jon  and
      Lee, Lillian",
    booktitle = "Proceedings of the 50th Annual Meeting of the Association for Computational Linguistics (Volume 1: Long Papers)",
    month = jul,
    year = "2012",
    address = "Jeju Island, Korea",
    publisher = "Association for Computational Linguistics",
    url = "https://www.aclweb.org/anthology/P12-1094",
    pages = "892--901",
}
@inproceedings{xiong-etal-2012-modeling,
    title = "Modeling the Translation of Predicate-Argument Structure for {SMT}",
    author = "Xiong, Deyi  and
      Zhang, Min  and
      Li, Haizhou",
    booktitle = "Proceedings of the 50th Annual Meeting of the Association for Computational Linguistics (Volume 1: Long Papers)",
    month = jul,
    year = "2012",
    address = "Jeju Island, Korea",
    publisher = "Association for Computational Linguistics",
    url = "https://www.aclweb.org/anthology/P12-1095",
    pages = "902--911",
}
@inproceedings{yang-etal-2012-ranking,
    title = "A Ranking-based Approach to Word Reordering for Statistical Machine Translation",
    author = "Yang, Nan  and
      Li, Mu  and
      Zhang, Dongdong  and
      Yu, Nenghai",
    booktitle = "Proceedings of the 50th Annual Meeting of the Association for Computational Linguistics (Volume 1: Long Papers)",
    month = jul,
    year = "2012",
    address = "Jeju Island, Korea",
    publisher = "Association for Computational Linguistics",
    url = "https://www.aclweb.org/anthology/P12-1096",
    pages = "912--920",
}
@inproceedings{liu-ng-2012-character,
    title = "Character-Level Machine Translation Evaluation for Languages with Ambiguous Word Boundaries",
    author = "Liu, Chang  and
      Ng, Hwee Tou",
    booktitle = "Proceedings of the 50th Annual Meeting of the Association for Computational Linguistics (Volume 1: Long Papers)",
    month = jul,
    year = "2012",
    address = "Jeju Island, Korea",
    publisher = "Association for Computational Linguistics",
    url = "https://www.aclweb.org/anthology/P12-1097",
    pages = "921--929",
}
@inproceedings{chen-etal-2012-port,
    title = "{PORT}: a Precision-Order-Recall {MT} Evaluation Metric for Tuning",
    author = "Chen, Boxing  and
      Kuhn, Roland  and
      Larkin, Samuel",
    booktitle = "Proceedings of the 50th Annual Meeting of the Association for Computational Linguistics (Volume 1: Long Papers)",
    month = jul,
    year = "2012",
    address = "Jeju Island, Korea",
    publisher = "Association for Computational Linguistics",
    url = "https://www.aclweb.org/anthology/P12-1098",
    pages = "930--939",
}
@inproceedings{razmara-etal-2012-mixing,
    title = "Mixing Multiple Translation Models in Statistical Machine Translation",
    author = "Razmara, Majid  and
      Foster, George  and
      Sankaran, Baskaran  and
      Sarkar, Anoop",
    booktitle = "Proceedings of the 50th Annual Meeting of the Association for Computational Linguistics (Volume 1: Long Papers)",
    month = jul,
    year = "2012",
    address = "Jeju Island, Korea",
    publisher = "Association for Computational Linguistics",
    url = "https://www.aclweb.org/anthology/P12-1099",
    pages = "940--949",
}
@inproceedings{feng-etal-2012-hierarchical,
    title = "Hierarchical Chunk-to-String Translation",
    author = "Feng, Yang  and
      Zhang, Dongdong  and
      Li, Mu  and
      Liu, Qun",
    booktitle = "Proceedings of the 50th Annual Meeting of the Association for Computational Linguistics (Volume 1: Long Papers)",
    month = jul,
    year = "2012",
    address = "Jeju Island, Korea",
    publisher = "Association for Computational Linguistics",
    url = "https://www.aclweb.org/anthology/P12-1100",
    pages = "950--958",
}
@inproceedings{pauls-klein-2012-large,
    title = "Large-Scale Syntactic Language Modeling with Treelets",
    author = "Pauls, Adam  and
      Klein, Dan",
    booktitle = "Proceedings of the 50th Annual Meeting of the Association for Computational Linguistics (Volume 1: Long Papers)",
    month = jul,
    year = "2012",
    address = "Jeju Island, Korea",
    publisher = "Association for Computational Linguistics",
    url = "https://www.aclweb.org/anthology/P12-1101",
    pages = "959--968",
}
@inproceedings{yamaguchi-tanaka-ishii-2012-text,
    title = "Text Segmentation by Language Using Minimum Description Length",
    author = "Yamaguchi, Hiroshi  and
      Tanaka-Ishii, Kumiko",
    booktitle = "Proceedings of the 50th Annual Meeting of the Association for Computational Linguistics (Volume 1: Long Papers)",
    month = jul,
    year = "2012",
    address = "Jeju Island, Korea",
    publisher = "Association for Computational Linguistics",
    url = "https://www.aclweb.org/anthology/P12-1102",
    pages = "969--978",
}
@inproceedings{he-etal-2012-improve,
    title = "Improve {SMT} Quality with Automatically Extracted Paraphrase Rules",
    author = "He, Wei  and
      Wu, Hua  and
      Wang, Haifeng  and
      Liu, Ting",
    booktitle = "Proceedings of the 50th Annual Meeting of the Association for Computational Linguistics (Volume 1: Long Papers)",
    month = jul,
    year = "2012",
    address = "Jeju Island, Korea",
    publisher = "Association for Computational Linguistics",
    url = "https://www.aclweb.org/anthology/P12-1103",
    pages = "979--987",
}
@inproceedings{guerini-etal-2012-ecological,
    title = "Ecological Evaluation of Persuasive Messages Using {G}oogle {A}d{W}ords",
    author = "Guerini, Marco  and
      Strapparava, Carlo  and
      Stock, Oliviero",
    booktitle = "Proceedings of the 50th Annual Meeting of the Association for Computational Linguistics (Volume 1: Long Papers)",
    month = jul,
    year = "2012",
    address = "Jeju Island, Korea",
    publisher = "Association for Computational Linguistics",
    url = "https://www.aclweb.org/anthology/P12-1104",
    pages = "988--996",
}
@inproceedings{dragut-etal-2012-polarity,
    title = "Polarity Consistency Checking for Sentiment Dictionaries",
    author = "Dragut, Eduard  and
      Wang, Hong  and
      Yu, Clement  and
      Sistla, Prasad  and
      Meng, Weiyi",
    booktitle = "Proceedings of the 50th Annual Meeting of the Association for Computational Linguistics (Volume 1: Long Papers)",
    month = jul,
    year = "2012",
    address = "Jeju Island, Korea",
    publisher = "Association for Computational Linguistics",
    url = "https://www.aclweb.org/anthology/P12-1105",
    pages = "997--1005",
}
@inproceedings{lin-etal-2012-combining,
    title = "Combining Coherence Models and Machine Translation Evaluation Metrics for Summarization Evaluation",
    author = "Lin, Ziheng  and
      Liu, Chang  and
      Ng, Hwee Tou  and
      Kan, Min-Yen",
    booktitle = "Proceedings of the 50th Annual Meeting of the Association for Computational Linguistics (Volume 1: Long Papers)",
    month = jul,
    year = "2012",
    address = "Jeju Island, Korea",
    publisher = "Association for Computational Linguistics",
    url = "https://www.aclweb.org/anthology/P12-1106",
    pages = "1006--1014",
}
@inproceedings{wubben-etal-2012-sentence,
    title = "Sentence Simplification by Monolingual Machine Translation",
    author = "Wubben, Sander  and
      van den Bosch, Antal  and
      Krahmer, Emiel",
    booktitle = "Proceedings of the 50th Annual Meeting of the Association for Computational Linguistics (Volume 1: Long Papers)",
    month = jul,
    year = "2012",
    address = "Jeju Island, Korea",
    publisher = "Association for Computational Linguistics",
    url = "https://www.aclweb.org/anthology/P12-1107",
    pages = "1015--1024",
}
@inproceedings{song-etal-2012-cost,
    title = "A Cost Sensitive Part-of-Speech Tagging: Differentiating Serious Errors from Minor Errors",
    author = "Song, Hyun-Je  and
      Son, Jeong-Woo  and
      Noh, Tae-Gil  and
      Park, Seong-Bae  and
      Lee, Sang-Jo",
    booktitle = "Proceedings of the 50th Annual Meeting of the Association for Computational Linguistics (Volume 1: Long Papers)",
    month = jul,
    year = "2012",
    address = "Jeju Island, Korea",
    publisher = "Association for Computational Linguistics",
    url = "https://www.aclweb.org/anthology/P12-1108",
    pages = "1025--1034",
}
@inproceedings{liu-etal-2012-broad,
    title = "A Broad-Coverage Normalization System for Social Media Language",
    author = "Liu, Fei  and
      Weng, Fuliang  and
      Jiang, Xiao",
    booktitle = "Proceedings of the 50th Annual Meeting of the Association for Computational Linguistics (Volume 1: Long Papers)",
    month = jul,
    year = "2012",
    address = "Jeju Island, Korea",
    publisher = "Association for Computational Linguistics",
    url = "https://www.aclweb.org/anthology/P12-1109",
    pages = "1035--1044",
}
@inproceedings{hatori-etal-2012-incremental,
    title = "Incremental Joint Approach to Word Segmentation, {POS} Tagging, and Dependency Parsing in {C}hinese",
    author = "Hatori, Jun  and
      Matsuzaki, Takuya  and
      Miyao, Yusuke  and
      Tsujii, Jun{'}ichi",
    booktitle = "Proceedings of the 50th Annual Meeting of the Association for Computational Linguistics (Volume 1: Long Papers)",
    month = jul,
    year = "2012",
    address = "Jeju Island, Korea",
    publisher = "Association for Computational Linguistics",
    url = "https://www.aclweb.org/anthology/P12-1110",
    pages = "1045--1053",
}
@inproceedings{zhao-marcus-2012-exploring,
    title = "Exploring Deterministic Constraints: from a Constrained {E}nglish {POS} Tagger to an Efficient {ILP} Solution to {C}hinese Word Segmentation",
    author = "Zhao, Qiuye  and
      Marcus, Mitch",
    booktitle = "Proceedings of the 50th Annual Meeting of the Association for Computational Linguistics (Volume 1: Long Papers)",
    month = jul,
    year = "2012",
    address = "Jeju Island, Korea",
    publisher = "Association for Computational Linguistics",
    url = "https://www.aclweb.org/anthology/P12-1111",
    pages = "1054--1062",
}
@proceedings{acl-2012-association-linguistics,
    title = "Proceedings of the 50th Annual Meeting of the Association for Computational Linguistics (Volume 2: Short Papers)",
    author = "Li, Haizhou  and
      Lin, Chin-Yew  and
      Osborne, Miles  and
      Lee, Gary Geunbae  and
      Park, Jong C.",
    month = jul,
    year = "2012",
    address = "Jeju Island, Korea",
    publisher = "Association for Computational Linguistics",
    url = "https://www.aclweb.org/anthology/P12-2000",
}
@inproceedings{chen-kit-2012-higher,
    title = "Higher-order Constituent Parsing and Parser Combination",
    author = "Chen, Xiao  and
      Kit, Chunyu",
    booktitle = "Proceedings of the 50th Annual Meeting of the Association for Computational Linguistics (Volume 2: Short Papers)",
    month = jul,
    year = "2012",
    address = "Jeju Island, Korea",
    publisher = "Association for Computational Linguistics",
    url = "https://www.aclweb.org/anthology/P12-2001",
    pages = "1--5",
}
@inproceedings{tsarfaty-etal-2012-joint,
    title = "Joint Evaluation of Morphological Segmentation and Syntactic Parsing",
    author = "Tsarfaty, Reut  and
      Nivre, Joakim  and
      Andersson, Evelina",
    booktitle = "Proceedings of the 50th Annual Meeting of the Association for Computational Linguistics (Volume 2: Short Papers)",
    month = jul,
    year = "2012",
    address = "Jeju Island, Korea",
    publisher = "Association for Computational Linguistics",
    url = "https://www.aclweb.org/anthology/P12-2002",
    pages = "6--10",
}
@inproceedings{che-etal-2012-comparison,
    title = "A Comparison of {C}hinese Parsers for {S}tanford Dependencies",
    author = "Che, Wanxiang  and
      Spitkovsky, Valentin  and
      Liu, Ting",
    booktitle = "Proceedings of the 50th Annual Meeting of the Association for Computational Linguistics (Volume 2: Short Papers)",
    month = jul,
    year = "2012",
    address = "Jeju Island, Korea",
    publisher = "Association for Computational Linguistics",
    url = "https://www.aclweb.org/anthology/P12-2003",
    pages = "11--16",
}
@inproceedings{golland-etal-2012-feature,
    title = "A Feature-Rich Constituent Context Model for Grammar Induction",
    author = "Golland, Dave  and
      DeNero, John  and
      Uszkoreit, Jakob",
    booktitle = "Proceedings of the 50th Annual Meeting of the Association for Computational Linguistics (Volume 2: Short Papers)",
    month = jul,
    year = "2012",
    address = "Jeju Island, Korea",
    publisher = "Association for Computational Linguistics",
    url = "https://www.aclweb.org/anthology/P12-2004",
    pages = "17--22",
}
@inproceedings{cancedda-2012-private,
    title = "Private Access to Phrase Tables for Statistical Machine Translation",
    author = "Cancedda, Nicola",
    booktitle = "Proceedings of the 50th Annual Meeting of the Association for Computational Linguistics (Volume 2: Short Papers)",
    month = jul,
    year = "2012",
    address = "Jeju Island, Korea",
    publisher = "Association for Computational Linguistics",
    url = "https://www.aclweb.org/anthology/P12-2005",
    pages = "23--27",
}
@inproceedings{wuebker-etal-2012-fast,
    title = "Fast and Scalable Decoding with Language Model Look-Ahead for Phrase-based Statistical Machine Translation",
    author = "Wuebker, Joern  and
      Ney, Hermann  and
      Zens, Richard",
    booktitle = "Proceedings of the 50th Annual Meeting of the Association for Computational Linguistics (Volume 2: Short Papers)",
    month = jul,
    year = "2012",
    address = "Jeju Island, Korea",
    publisher = "Association for Computational Linguistics",
    url = "https://www.aclweb.org/anthology/P12-2006",
    pages = "28--32",
}
@inproceedings{li-etal-2012-head,
    title = "Head-Driven Hierarchical Phrase-based Translation",
    author = "Li, Junhui  and
      Tu, Zhaopeng  and
      Zhou, Guodong  and
      van Genabith, Josef",
    booktitle = "Proceedings of the 50th Annual Meeting of the Association for Computational Linguistics (Volume 2: Short Papers)",
    month = jul,
    year = "2012",
    address = "Jeju Island, Korea",
    publisher = "Association for Computational Linguistics",
    url = "https://www.aclweb.org/anthology/P12-2007",
    pages = "33--37",
}
@inproceedings{sun-zhou-2012-joint,
    title = "Joint Learning of a Dual {SMT} System for Paraphrase Generation",
    author = "Sun, Hong  and
      Zhou, Ming",
    booktitle = "Proceedings of the 50th Annual Meeting of the Association for Computational Linguistics (Volume 2: Short Papers)",
    month = jul,
    year = "2012",
    address = "Jeju Island, Korea",
    publisher = "Association for Computational Linguistics",
    url = "https://www.aclweb.org/anthology/P12-2008",
    pages = "38--42",
}
@inproceedings{zhao-etal-2012-novel,
    title = "A Novel Burst-based Text Representation Model for Scalable Event Detection",
    author = "Zhao, Xin  and
      Chen, Rishan  and
      Fan, Kai  and
      Yan, Hongfei  and
      Li, Xiaoming",
    booktitle = "Proceedings of the 50th Annual Meeting of the Association for Computational Linguistics (Volume 2: Short Papers)",
    month = jul,
    year = "2012",
    address = "Jeju Island, Korea",
    publisher = "Association for Computational Linguistics",
    url = "https://www.aclweb.org/anthology/P12-2009",
    pages = "43--47",
}
@inproceedings{kim-lee-2012-graph,
    title = "A Graph-based Cross-lingual Projection Approach for Weakly Supervised Relation Extraction",
    author = "Kim, Seokhwan  and
      Lee, Gary Geunbae",
    booktitle = "Proceedings of the 50th Annual Meeting of the Association for Computational Linguistics (Volume 2: Short Papers)",
    month = jul,
    year = "2012",
    address = "Jeju Island, Korea",
    publisher = "Association for Computational Linguistics",
    url = "https://www.aclweb.org/anthology/P12-2010",
    pages = "48--53",
}
@inproceedings{alfonseca-etal-2012-pattern,
    title = "Pattern Learning for Relation Extraction with a Hierarchical Topic Model",
    author = "Alfonseca, Enrique  and
      Filippova, Katja  and
      Delort, Jean-Yves  and
      Garrido, Guillermo",
    booktitle = "Proceedings of the 50th Annual Meeting of the Association for Computational Linguistics (Volume 2: Short Papers)",
    month = jul,
    year = "2012",
    address = "Jeju Island, Korea",
    publisher = "Association for Computational Linguistics",
    url = "https://www.aclweb.org/anthology/P12-2011",
    pages = "54--59",
}
@inproceedings{bak-etal-2012-self,
    title = "Self-Disclosure and Relationship Strength in Twitter Conversations",
    author = "Bak, JinYeong  and
      Kim, Suin  and
      Oh, Alice",
    booktitle = "Proceedings of the 50th Annual Meeting of the Association for Computational Linguistics (Volume 2: Short Papers)",
    month = jul,
    year = "2012",
    address = "Jeju Island, Korea",
    publisher = "Association for Computational Linguistics",
    url = "https://www.aclweb.org/anthology/P12-2012",
    pages = "60--64",
}
@inproceedings{dasigi-etal-2012-genre,
    title = "Genre Independent Subgroup Detection in Online Discussion Threads: A Study of Implicit Attitude using Textual Latent Semantics",
    author = "Dasigi, Pradeep  and
      Guo, Weiwei  and
      Diab, Mona",
    booktitle = "Proceedings of the 50th Annual Meeting of the Association for Computational Linguistics (Volume 2: Short Papers)",
    month = jul,
    year = "2012",
    address = "Jeju Island, Korea",
    publisher = "Association for Computational Linguistics",
    url = "https://www.aclweb.org/anthology/P12-2013",
    pages = "65--69",
}
@inproceedings{raghavan-etal-2012-learning-temporally,
    title = "Learning to Temporally Order Medical Events in Clinical Text",
    author = "Raghavan, Preethi  and
      Lai, Albert  and
      Fosler-Lussier, Eric",
    booktitle = "Proceedings of the 50th Annual Meeting of the Association for Computational Linguistics (Volume 2: Short Papers)",
    month = jul,
    year = "2012",
    address = "Jeju Island, Korea",
    publisher = "Association for Computational Linguistics",
    url = "https://www.aclweb.org/anthology/P12-2014",
    pages = "70--74",
}
@inproceedings{veale-2012-context,
    title = "A Context-sensitive, Multi-faceted Model of Lexico-Conceptual Affect",
    author = "Veale, Tony",
    booktitle = "Proceedings of the 50th Annual Meeting of the Association for Computational Linguistics (Volume 2: Short Papers)",
    month = jul,
    year = "2012",
    address = "Jeju Island, Korea",
    publisher = "Association for Computational Linguistics",
    url = "https://www.aclweb.org/anthology/P12-2015",
    pages = "75--79",
}
@inproceedings{reddy-knight-2012-decoding,
    title = "Decoding Running Key Ciphers",
    author = "Reddy, Sravana  and
      Knight, Kevin",
    booktitle = "Proceedings of the 50th Annual Meeting of the Association for Computational Linguistics (Volume 2: Short Papers)",
    month = jul,
    year = "2012",
    address = "Jeju Island, Korea",
    publisher = "Association for Computational Linguistics",
    url = "https://www.aclweb.org/anthology/P12-2016",
    pages = "80--84",
}
@inproceedings{borschinger-johnson-2012-using,
    title = "Using Rejuvenation to Improve Particle Filtering for {B}ayesian Word Segmentation",
    author = {B{\"o}rschinger, Benjamin  and
      Johnson, Mark},
    booktitle = "Proceedings of the 50th Annual Meeting of the Association for Computational Linguistics (Volume 2: Short Papers)",
    month = jul,
    year = "2012",
    address = "Jeju Island, Korea",
    publisher = "Association for Computational Linguistics",
    url = "https://www.aclweb.org/anthology/P12-2017",
    pages = "85--89",
}
@inproceedings{wang-manning-2012-baselines,
    title = "Baselines and Bigrams: Simple, Good Sentiment and Topic Classification",
    author = "Wang, Sida  and
      Manning, Christopher",
    booktitle = "Proceedings of the 50th Annual Meeting of the Association for Computational Linguistics (Volume 2: Short Papers)",
    month = jul,
    year = "2012",
    address = "Jeju Island, Korea",
    publisher = "Association for Computational Linguistics",
    url = "https://www.aclweb.org/anthology/P12-2018",
    pages = "90--94",
}
@inproceedings{sahakian-snyder-2012-automatically,
    title = "Automatically Learning Measures of Child Language Development",
    author = "Sahakian, Sam  and
      Snyder, Benjamin",
    booktitle = "Proceedings of the 50th Annual Meeting of the Association for Computational Linguistics (Volume 2: Short Papers)",
    month = jul,
    year = "2012",
    address = "Jeju Island, Korea",
    publisher = "Association for Computational Linguistics",
    url = "https://www.aclweb.org/anthology/P12-2019",
    pages = "95--99",
}
@inproceedings{wu-etal-2012-comparative,
    title = "A Comparative Study of Target Dependency Structures for Statistical Machine Translation",
    author = "Wu, Xianchao  and
      Sudoh, Katsuhito  and
      Duh, Kevin  and
      Tsukada, Hajime  and
      Nagata, Masaaki",
    booktitle = "Proceedings of the 50th Annual Meeting of the Association for Computational Linguistics (Volume 2: Short Papers)",
    month = jul,
    year = "2012",
    address = "Jeju Island, Korea",
    publisher = "Association for Computational Linguistics",
    url = "https://www.aclweb.org/anthology/P12-2020",
    pages = "100--104",
}
@inproceedings{kummerfeld-etal-2012-robust,
    title = "Robust Conversion of {CCG} Derivations to Phrase Structure Trees",
    author = "Kummerfeld, Jonathan K.  and
      Klein, Dan  and
      Curran, James R.",
    booktitle = "Proceedings of the 50th Annual Meeting of the Association for Computational Linguistics (Volume 2: Short Papers)",
    month = jul,
    year = "2012",
    address = "Jeju Island, Korea",
    publisher = "Association for Computational Linguistics",
    url = "https://www.aclweb.org/anthology/P12-2021",
    pages = "105--109",
}
@inproceedings{yamangil-shieber-2012-estimating,
    title = "Estimating Compact Yet Rich Tree Insertion Grammars",
    author = "Yamangil, Elif  and
      Shieber, Stuart",
    booktitle = "Proceedings of the 50th Annual Meeting of the Association for Computational Linguistics (Volume 2: Short Papers)",
    month = jul,
    year = "2012",
    address = "Jeju Island, Korea",
    publisher = "Association for Computational Linguistics",
    url = "https://www.aclweb.org/anthology/P12-2022",
    pages = "110--114",
}
@inproceedings{eidelman-etal-2012-topic,
    title = "Topic Models for Dynamic Translation Model Adaptation",
    author = "Eidelman, Vladimir  and
      Boyd-Graber, Jordan  and
      Resnik, Philip",
    booktitle = "Proceedings of the 50th Annual Meeting of the Association for Computational Linguistics (Volume 2: Short Papers)",
    month = jul,
    year = "2012",
    address = "Jeju Island, Korea",
    publisher = "Association for Computational Linguistics",
    url = "https://www.aclweb.org/anthology/P12-2023",
    pages = "115--119",
}
@inproceedings{mehdad-etal-2012-detecting,
    title = "Detecting Semantic Equivalence and Information Disparity in Cross-lingual Documents",
    author = "Mehdad, Yashar  and
      Negri, Matteo  and
      Federico, Marcello",
    booktitle = "Proceedings of the 50th Annual Meeting of the Association for Computational Linguistics (Volume 2: Short Papers)",
    month = jul,
    year = "2012",
    address = "Jeju Island, Korea",
    publisher = "Association for Computational Linguistics",
    url = "https://www.aclweb.org/anthology/P12-2024",
    pages = "120--124",
}
@inproceedings{frermann-bond-2012-cross,
    title = "Cross-lingual Parse Disambiguation based on Semantic Correspondence",
    author = "Frermann, Lea  and
      Bond, Francis",
    booktitle = "Proceedings of the 50th Annual Meeting of the Association for Computational Linguistics (Volume 2: Short Papers)",
    month = jul,
    year = "2012",
    address = "Jeju Island, Korea",
    publisher = "Association for Computational Linguistics",
    url = "https://www.aclweb.org/anthology/P12-2025",
    pages = "125--129",
}
@inproceedings{chang-etal-2012-learning,
    title = "Learning to Find Translations and Transliterations on the Web",
    author = "Chang, Joseph Z.  and
      Chang, Jason S.  and
      Jang, Roger Jyh-Shing",
    booktitle = "Proceedings of the 50th Annual Meeting of the Association for Computational Linguistics (Volume 2: Short Papers)",
    month = jul,
    year = "2012",
    address = "Jeju Island, Korea",
    publisher = "Association for Computational Linguistics",
    url = "https://www.aclweb.org/anthology/P12-2026",
    pages = "130--134",
}
@inproceedings{garley-hockenmaier-2012-beefmoves,
    title = "{B}eefmoves: Dissemination, Diversity, and Dynamics of {E}nglish Borrowings in a {G}erman Hip Hop Forum",
    author = "Garley, Matt  and
      Hockenmaier, Julia",
    booktitle = "Proceedings of the 50th Annual Meeting of the Association for Computational Linguistics (Volume 2: Short Papers)",
    month = jul,
    year = "2012",
    address = "Jeju Island, Korea",
    publisher = "Association for Computational Linguistics",
    url = "https://www.aclweb.org/anthology/P12-2027",
    pages = "135--139",
}
@inproceedings{guo-diab-2012-learning,
    title = "Learning the Latent Semantics of a Concept from its Definition",
    author = "Guo, Weiwei  and
      Diab, Mona",
    booktitle = "Proceedings of the 50th Annual Meeting of the Association for Computational Linguistics (Volume 2: Short Papers)",
    month = jul,
    year = "2012",
    address = "Jeju Island, Korea",
    publisher = "Association for Computational Linguistics",
    url = "https://www.aclweb.org/anthology/P12-2028",
    pages = "140--144",
}
@inproceedings{garg-henderson-2012-unsupervised,
    title = "Unsupervised Semantic Role Induction with Global Role Ordering",
    author = "Garg, Nikhil  and
      Henderson, James",
    booktitle = "Proceedings of the 50th Annual Meeting of the Association for Computational Linguistics (Volume 2: Short Papers)",
    month = jul,
    year = "2012",
    address = "Jeju Island, Korea",
    publisher = "Association for Computational Linguistics",
    url = "https://www.aclweb.org/anthology/P12-2029",
    pages = "145--149",
}
@inproceedings{labutov-lipson-2012-humor,
    title = "Humor as Circuits in Semantic Networks",
    author = "Labutov, Igor  and
      Lipson, Hod",
    booktitle = "Proceedings of the 50th Annual Meeting of the Association for Computational Linguistics (Volume 2: Short Papers)",
    month = jul,
    year = "2012",
    address = "Jeju Island, Korea",
    publisher = "Association for Computational Linguistics",
    url = "https://www.aclweb.org/anthology/P12-2030",
    pages = "150--155",
}
@inproceedings{zeichner-etal-2012-crowdsourcing,
    title = "Crowdsourcing Inference-Rule Evaluation",
    author = "Zeichner, Naomi  and
      Berant, Jonathan  and
      Dagan, Ido",
    booktitle = "Proceedings of the 50th Annual Meeting of the Association for Computational Linguistics (Volume 2: Short Papers)",
    month = jul,
    year = "2012",
    address = "Jeju Island, Korea",
    publisher = "Association for Computational Linguistics",
    url = "https://www.aclweb.org/anthology/P12-2031",
    pages = "156--160",
}
@inproceedings{agarwal-etal-2012-comprehensive,
    title = "A Comprehensive Gold Standard for the {E}nron Organizational Hierarchy",
    author = "Agarwal, Apoorv  and
      Omuya, Adinoyi  and
      Harnly, Aaron  and
      Rambow, Owen",
    booktitle = "Proceedings of the 50th Annual Meeting of the Association for Computational Linguistics (Volume 2: Short Papers)",
    month = jul,
    year = "2012",
    address = "Jeju Island, Korea",
    publisher = "Association for Computational Linguistics",
    url = "https://www.aclweb.org/anthology/P12-2032",
    pages = "161--165",
}
@inproceedings{wang-etal-2012-two,
    title = "A Two-step Approach to Sentence Compression of Spoken Utterances",
    author = "Wang, Dong  and
      Qian, Xian  and
      Liu, Yang",
    booktitle = "Proceedings of the 50th Annual Meeting of the Association for Computational Linguistics (Volume 2: Short Papers)",
    month = jul,
    year = "2012",
    address = "Jeju Island, Korea",
    publisher = "Association for Computational Linguistics",
    url = "https://www.aclweb.org/anthology/P12-2033",
    pages = "166--170",
}
@inproceedings{feng-etal-2012-syntactic,
    title = "Syntactic Stylometry for Deception Detection",
    author = "Feng, Song  and
      Banerjee, Ritwik  and
      Choi, Yejin",
    booktitle = "Proceedings of the 50th Annual Meeting of the Association for Computational Linguistics (Volume 2: Short Papers)",
    month = jul,
    year = "2012",
    address = "Jeju Island, Korea",
    publisher = "Association for Computational Linguistics",
    url = "https://www.aclweb.org/anthology/P12-2034",
    pages = "171--175",
}
@inproceedings{mohamed-etal-2012-transforming,
    title = "Transforming Standard {A}rabic to Colloquial {A}rabic",
    author = "Mohamed, Emad  and
      Mohit, Behrang  and
      Oflazer, Kemal",
    booktitle = "Proceedings of the 50th Annual Meeting of the Association for Computational Linguistics (Volume 2: Short Papers)",
    month = jul,
    year = "2012",
    address = "Jeju Island, Korea",
    publisher = "Association for Computational Linguistics",
    url = "https://www.aclweb.org/anthology/P12-2035",
    pages = "176--180",
}
@inproceedings{benotti-etal-2012-corpus,
    title = "Corpus-based Interpretation of Instructions in Virtual Environments",
    author = "Benotti, Luciana  and
      Villalba, Mart{\'\i}n  and
      Lau, Tessa  and
      Cerruti, Juli{\'a}n",
    booktitle = "Proceedings of the 50th Annual Meeting of the Association for Computational Linguistics (Volume 2: Short Papers)",
    month = jul,
    year = "2012",
    address = "Jeju Island, Korea",
    publisher = "Association for Computational Linguistics",
    url = "https://www.aclweb.org/anthology/P12-2036",
    pages = "181--186",
}
@inproceedings{xue-etal-2012-automatically,
    title = "Automatically Mining Question Reformulation Patterns from Search Log Data",
    author = "Xue, Xiaobing  and
      Tao, Yu  and
      Jiang, Daxin  and
      Li, Hang",
    booktitle = "Proceedings of the 50th Annual Meeting of the Association for Computational Linguistics (Volume 2: Short Papers)",
    month = jul,
    year = "2012",
    address = "Jeju Island, Korea",
    publisher = "Association for Computational Linguistics",
    url = "https://www.aclweb.org/anthology/P12-2037",
    pages = "187--192",
}
@inproceedings{swanson-charniak-2012-native,
    title = "Native Language Detection with Tree Substitution Grammars",
    author = "Swanson, Benjamin  and
      Charniak, Eugene",
    booktitle = "Proceedings of the 50th Annual Meeting of the Association for Computational Linguistics (Volume 2: Short Papers)",
    month = jul,
    year = "2012",
    address = "Jeju Island, Korea",
    publisher = "Association for Computational Linguistics",
    url = "https://www.aclweb.org/anthology/P12-2038",
    pages = "193--197",
}
@inproceedings{tajiri-etal-2012-tense,
    title = "Tense and Aspect Error Correction for {ESL} Learners Using Global Context",
    author = "Tajiri, Toshikazu  and
      Komachi, Mamoru  and
      Matsumoto, Yuji",
    booktitle = "Proceedings of the 50th Annual Meeting of the Association for Computational Linguistics (Volume 2: Short Papers)",
    month = jul,
    year = "2012",
    address = "Jeju Island, Korea",
    publisher = "Association for Computational Linguistics",
    url = "https://www.aclweb.org/anthology/P12-2039",
    pages = "198--202",
}
@inproceedings{banchs-2012-movie,
    title = "Movie-{D}i{C}: a Movie Dialogue Corpus for Research and Development",
    author = "Banchs, Rafael E.",
    booktitle = "Proceedings of the 50th Annual Meeting of the Association for Computational Linguistics (Volume 2: Short Papers)",
    month = jul,
    year = "2012",
    address = "Jeju Island, Korea",
    publisher = "Association for Computational Linguistics",
    url = "https://www.aclweb.org/anthology/P12-2040",
    pages = "203--207",
}
@inproceedings{cabrio-villata-2012-combining,
    title = "Combining Textual Entailment and Argumentation Theory for Supporting Online Debates Interactions",
    author = "Cabrio, Elena  and
      Villata, Serena",
    booktitle = "Proceedings of the 50th Annual Meeting of the Association for Computational Linguistics (Volume 2: Short Papers)",
    month = jul,
    year = "2012",
    address = "Jeju Island, Korea",
    publisher = "Association for Computational Linguistics",
    url = "https://www.aclweb.org/anthology/P12-2041",
    pages = "208--212",
}
@inproceedings{chiarcos-2012-towards,
    title = "Towards the Unsupervised Acquisition of Discourse Relations",
    author = "Chiarcos, Christian",
    booktitle = "Proceedings of the 50th Annual Meeting of the Association for Computational Linguistics (Volume 2: Short Papers)",
    month = jul,
    year = "2012",
    address = "Jeju Island, Korea",
    publisher = "Association for Computational Linguistics",
    url = "https://www.aclweb.org/anthology/P12-2042",
    pages = "213--217",
}
@inproceedings{darwish-ali-2012-arabic,
    title = "{A}rabic Retrieval Revisited: Morphological Hole Filling",
    author = "Darwish, Kareem  and
      Ali, Ahmed",
    booktitle = "Proceedings of the 50th Annual Meeting of the Association for Computational Linguistics (Volume 2: Short Papers)",
    month = jul,
    year = "2012",
    address = "Jeju Island, Korea",
    publisher = "Association for Computational Linguistics",
    url = "https://www.aclweb.org/anthology/P12-2043",
    pages = "218--222",
}
@inproceedings{williams-katz-2012-extracting,
    title = "Extracting and modeling durations for habits and events from Twitter",
    author = "Williams, Jennifer  and
      Katz, Graham",
    booktitle = "Proceedings of the 50th Annual Meeting of the Association for Computational Linguistics (Volume 2: Short Papers)",
    month = jul,
    year = "2012",
    address = "Jeju Island, Korea",
    publisher = "Association for Computational Linguistics",
    url = "https://www.aclweb.org/anthology/P12-2044",
    pages = "223--227",
}
@inproceedings{nothman-etal-2012-event,
    title = "Event Linking: Grounding Event Reference in a News Archive",
    author = "Nothman, Joel  and
      Honnibal, Matthew  and
      Hachey, Ben  and
      Curran, James R.",
    booktitle = "Proceedings of the 50th Annual Meeting of the Association for Computational Linguistics (Volume 2: Short Papers)",
    month = jul,
    year = "2012",
    address = "Jeju Island, Korea",
    publisher = "Association for Computational Linguistics",
    url = "https://www.aclweb.org/anthology/P12-2045",
    pages = "228--232",
}
@inproceedings{wang-etal-2012-coupling,
    title = "Coupling Label Propagation and Constraints for Temporal Fact Extraction",
    author = "Wang, Yafang  and
      Dylla, Maximilian  and
      Spaniol, Marc  and
      Weikum, Gerhard",
    booktitle = "Proceedings of the 50th Annual Meeting of the Association for Computational Linguistics (Volume 2: Short Papers)",
    month = jul,
    year = "2012",
    address = "Jeju Island, Korea",
    publisher = "Association for Computational Linguistics",
    url = "https://www.aclweb.org/anthology/P12-2046",
    pages = "233--237",
}
@inproceedings{ganchev-etal-2012-using,
    title = "Using Search-Logs to Improve Query Tagging",
    author = "Ganchev, Kuzman  and
      Hall, Keith  and
      McDonald, Ryan  and
      Petrov, Slav",
    booktitle = "Proceedings of the 50th Annual Meeting of the Association for Computational Linguistics (Volume 2: Short Papers)",
    month = jul,
    year = "2012",
    address = "Jeju Island, Korea",
    publisher = "Association for Computational Linguistics",
    url = "https://www.aclweb.org/anthology/P12-2047",
    pages = "238--242",
}
@inproceedings{tyndall-2012-toward,
    title = "Toward Automatically Assembling {H}ittite-Language Cuneiform Tablet Fragments into Larger Texts",
    author = "Tyndall, Stephen",
    booktitle = "Proceedings of the 50th Annual Meeting of the Association for Computational Linguistics (Volume 2: Short Papers)",
    month = jul,
    year = "2012",
    address = "Jeju Island, Korea",
    publisher = "Association for Computational Linguistics",
    url = "https://www.aclweb.org/anthology/P12-2048",
    pages = "243--247",
}
@inproceedings{lee-webster-2012-corpus,
    title = "A Corpus of Textual Revisions in Second Language Writing",
    author = "Lee, John  and
      Webster, Jonathan",
    booktitle = "Proceedings of the 50th Annual Meeting of the Association for Computational Linguistics (Volume 2: Short Papers)",
    month = jul,
    year = "2012",
    address = "Jeju Island, Korea",
    publisher = "Association for Computational Linguistics",
    url = "https://www.aclweb.org/anthology/P12-2049",
    pages = "248--252",
}
@inproceedings{schneider-etal-2012-coarse,
    title = "Coarse Lexical Semantic Annotation with Supersenses: An {A}rabic Case Study",
    author = "Schneider, Nathan  and
      Mohit, Behrang  and
      Oflazer, Kemal  and
      Smith, Noah A.",
    booktitle = "Proceedings of the 50th Annual Meeting of the Association for Computational Linguistics (Volume 2: Short Papers)",
    month = jul,
    year = "2012",
    address = "Jeju Island, Korea",
    publisher = "Association for Computational Linguistics",
    url = "https://www.aclweb.org/anthology/P12-2050",
    pages = "253--258",
}
@inproceedings{mihalcea-nastase-2012-word,
    title = "Word Epoch Disambiguation: Finding How Words Change Over Time",
    author = "Mihalcea, Rada  and
      Nastase, Vivi",
    booktitle = "Proceedings of the 50th Annual Meeting of the Association for Computational Linguistics (Volume 2: Short Papers)",
    month = jul,
    year = "2012",
    address = "Jeju Island, Korea",
    publisher = "Association for Computational Linguistics",
    url = "https://www.aclweb.org/anthology/P12-2051",
    pages = "259--263",
}
@inproceedings{seroussi-etal-2012-authorship,
    title = "Authorship Attribution with Author-aware Topic Models",
    author = "Seroussi, Yanir  and
      Bohnert, Fabian  and
      Zukerman, Ingrid",
    booktitle = "Proceedings of the 50th Annual Meeting of the Association for Computational Linguistics (Volume 2: Short Papers)",
    month = jul,
    year = "2012",
    address = "Jeju Island, Korea",
    publisher = "Association for Computational Linguistics",
    url = "https://www.aclweb.org/anthology/P12-2052",
    pages = "264--269",
}
@inproceedings{yang-etal-2012-information,
    title = "Information-theoretic Multi-view Domain Adaptation",
    author = "Yang, Pei  and
      Gao, Wei  and
      Tan, Qi  and
      Wong, Kam-Fai",
    booktitle = "Proceedings of the 50th Annual Meeting of the Association for Computational Linguistics (Volume 2: Short Papers)",
    month = jul,
    year = "2012",
    address = "Jeju Island, Korea",
    publisher = "Association for Computational Linguistics",
    url = "https://www.aclweb.org/anthology/P12-2053",
    pages = "270--274",
}
@inproceedings{hu-boyd-graber-2012-efficient,
    title = "Efficient Tree-Based Topic Modeling",
    author = "Hu, Yuening  and
      Boyd-Graber, Jordan",
    booktitle = "Proceedings of the 50th Annual Meeting of the Association for Computational Linguistics (Volume 2: Short Papers)",
    month = jul,
    year = "2012",
    address = "Jeju Island, Korea",
    publisher = "Association for Computational Linguistics",
    url = "https://www.aclweb.org/anthology/P12-2054",
    pages = "275--279",
}
@inproceedings{zhu-etal-2012-learning,
    title = "Learning Better Rule Extraction with Translation Span Alignment",
    author = "Zhu, Jingbo  and
      Xiao, Tong  and
      Zhang, Chunliang",
    booktitle = "Proceedings of the 50th Annual Meeting of the Association for Computational Linguistics (Volume 2: Short Papers)",
    month = jul,
    year = "2012",
    address = "Jeju Island, Korea",
    publisher = "Association for Computational Linguistics",
    url = "https://www.aclweb.org/anthology/P12-2055",
    pages = "280--284",
}
@inproceedings{xi-etal-2012-enhancing,
    title = "Enhancing Statistical Machine Translation with Character Alignment",
    author = "Xi, Ning  and
      Tang, Guangchao  and
      Dai, Xinyu  and
      Huang, Shujian  and
      Chen, Jiajun",
    booktitle = "Proceedings of the 50th Annual Meeting of the Association for Computational Linguistics (Volume 2: Short Papers)",
    month = jul,
    year = "2012",
    address = "Jeju Island, Korea",
    publisher = "Association for Computational Linguistics",
    url = "https://www.aclweb.org/anthology/P12-2056",
    pages = "285--290",
}
@inproceedings{lee-etal-2012-translation,
    title = "Translation Model Size Reduction for Hierarchical Phrase-based Statistical Machine Translation",
    author = "Lee, Seung-Wook  and
      Zhang, Dongdong  and
      Li, Mu  and
      Zhou, Ming  and
      Rim, Hae-Chang",
    booktitle = "Proceedings of the 50th Annual Meeting of the Association for Computational Linguistics (Volume 2: Short Papers)",
    month = jul,
    year = "2012",
    address = "Jeju Island, Korea",
    publisher = "Association for Computational Linguistics",
    url = "https://www.aclweb.org/anthology/P12-2057",
    pages = "291--295",
}
@inproceedings{gesmundo-etal-2012-heuristic,
    title = "Heuristic Cube Pruning in Linear Time",
    author = "Gesmundo, Andrea  and
      Satta, Giorgio  and
      Henderson, James",
    booktitle = "Proceedings of the 50th Annual Meeting of the Association for Computational Linguistics (Volume 2: Short Papers)",
    month = jul,
    year = "2012",
    address = "Jeju Island, Korea",
    publisher = "Association for Computational Linguistics",
    url = "https://www.aclweb.org/anthology/P12-2058",
    pages = "296--300",
}
@inproceedings{nakov-tiedemann-2012-combining,
    title = "Combining Word-Level and Character-Level Models for Machine Translation Between Closely-Related Languages",
    author = {Nakov, Preslav  and
      Tiedemann, J{\"o}rg},
    booktitle = "Proceedings of the 50th Annual Meeting of the Association for Computational Linguistics (Volume 2: Short Papers)",
    month = jul,
    year = "2012",
    address = "Jeju Island, Korea",
    publisher = "Association for Computational Linguistics",
    url = "https://www.aclweb.org/anthology/P12-2059",
    pages = "301--305",
}
@inproceedings{riley-gildea-2012-improving,
    title = "Improving the {IBM} Alignment Models Using Variational {B}ayes",
    author = "Riley, Darcey  and
      Gildea, Daniel",
    booktitle = "Proceedings of the 50th Annual Meeting of the Association for Computational Linguistics (Volume 2: Short Papers)",
    month = jul,
    year = "2012",
    address = "Jeju Island, Korea",
    publisher = "Association for Computational Linguistics",
    url = "https://www.aclweb.org/anthology/P12-2060",
    pages = "306--310",
}
@inproceedings{goto-etal-2012-post,
    title = "Post-ordering by Parsing for {J}apanese-{E}nglish Statistical Machine Translation",
    author = "Goto, Isao  and
      Utiyama, Masao  and
      Sumita, Eiichiro",
    booktitle = "Proceedings of the 50th Annual Meeting of the Association for Computational Linguistics (Volume 2: Short Papers)",
    month = jul,
    year = "2012",
    address = "Jeju Island, Korea",
    publisher = "Association for Computational Linguistics",
    url = "https://www.aclweb.org/anthology/P12-2061",
    pages = "311--316",
}
@inproceedings{zhang-chiang-2012-exploration,
    title = "An Exploration of Forest-to-String Translation: Does Translation Help or Hurt Parsing?",
    author = "Zhang, Hui  and
      Chiang, David",
    booktitle = "Proceedings of the 50th Annual Meeting of the Association for Computational Linguistics (Volume 2: Short Papers)",
    month = jul,
    year = "2012",
    address = "Jeju Island, Korea",
    publisher = "Association for Computational Linguistics",
    url = "https://www.aclweb.org/anthology/P12-2062",
    pages = "317--321",
}
@inproceedings{stallard-etal-2012-unsupervised,
    title = "Unsupervised Morphology Rivals Supervised Morphology for {A}rabic {MT}",
    author = "Stallard, David  and
      Devlin, Jacob  and
      Kayser, Michael  and
      Lee, Yoong Keok  and
      Barzilay, Regina",
    booktitle = "Proceedings of the 50th Annual Meeting of the Association for Computational Linguistics (Volume 2: Short Papers)",
    month = jul,
    year = "2012",
    address = "Jeju Island, Korea",
    publisher = "Association for Computational Linguistics",
    url = "https://www.aclweb.org/anthology/P12-2063",
    pages = "322--327",
}
@inproceedings{seo-etal-2012-meta,
    title = "A Meta Learning Approach to Grammatical Error Correction",
    author = "Seo, Hongsuck  and
      Lee, Jonghoon  and
      Kim, Seokhwan  and
      Lee, Kyusong  and
      Kang, Sechun  and
      Lee, Gary Geunbae",
    booktitle = "Proceedings of the 50th Annual Meeting of the Association for Computational Linguistics (Volume 2: Short Papers)",
    month = jul,
    year = "2012",
    address = "Jeju Island, Korea",
    publisher = "Association for Computational Linguistics",
    url = "https://www.aclweb.org/anthology/P12-2064",
    pages = "328--332",
}
@inproceedings{fang-huang-2012-fine,
    title = "Fine Granular Aspect Analysis using Latent Structural Models",
    author = "Fang, Lei  and
      Huang, Minlie",
    booktitle = "Proceedings of the 50th Annual Meeting of the Association for Computational Linguistics (Volume 2: Short Papers)",
    month = jul,
    year = "2012",
    address = "Jeju Island, Korea",
    publisher = "Association for Computational Linguistics",
    url = "https://www.aclweb.org/anthology/P12-2065",
    pages = "333--337",
}
@inproceedings{tu-etal-2012-identifying,
    title = "Identifying High-Impact Sub-Structures for Convolution Kernels in Document-level Sentiment Classification",
    author = "Tu, Zhaopeng  and
      He, Yifan  and
      Foster, Jennifer  and
      van Genabith, Josef  and
      Liu, Qun  and
      Lin, Shouxun",
    booktitle = "Proceedings of the 50th Annual Meeting of the Association for Computational Linguistics (Volume 2: Short Papers)",
    month = jul,
    year = "2012",
    address = "Jeju Island, Korea",
    publisher = "Association for Computational Linguistics",
    url = "https://www.aclweb.org/anthology/P12-2066",
    pages = "338--343",
}
@inproceedings{kuo-etal-2012-exploiting,
    title = "Exploiting Latent Information to Predict Diffusions of Novel Topics on Social Networks",
    author = "Kuo, Tsung-Ting  and
      Hung, San-Chuan  and
      Lin, Wei-Shih  and
      Peng, Nanyun  and
      Lin, Shou-De  and
      Lin, Wei-Fen",
    booktitle = "Proceedings of the 50th Annual Meeting of the Association for Computational Linguistics (Volume 2: Short Papers)",
    month = jul,
    year = "2012",
    address = "Jeju Island, Korea",
    publisher = "Association for Computational Linguistics",
    url = "https://www.aclweb.org/anthology/P12-2067",
    pages = "344--348",
}
@inproceedings{yoshikawa-etal-2012-sentence,
    title = "Sentence Compression with Semantic Role Constraints",
    author = "Yoshikawa, Katsumasa  and
      Iida, Ryu  and
      Hirao, Tsutomu  and
      Okumura, Manabu",
    booktitle = "Proceedings of the 50th Annual Meeting of the Association for Computational Linguistics (Volume 2: Short Papers)",
    month = jul,
    year = "2012",
    address = "Jeju Island, Korea",
    publisher = "Association for Computational Linguistics",
    url = "https://www.aclweb.org/anthology/P12-2068",
    pages = "349--353",
}
@inproceedings{genest-lapalme-2012-fully,
    title = "Fully Abstractive Approach to Guided Summarization",
    author = "Genest, Pierre-Etienne  and
      Lapalme, Guy",
    booktitle = "Proceedings of the 50th Annual Meeting of the Association for Computational Linguistics (Volume 2: Short Papers)",
    month = jul,
    year = "2012",
    address = "Jeju Island, Korea",
    publisher = "Association for Computational Linguistics",
    url = "https://www.aclweb.org/anthology/P12-2069",
    pages = "354--358",
}
@inproceedings{owczarzak-etal-2012-assessing,
    title = "Assessing the Effect of Inconsistent Assessors on Summarization Evaluation",
    author = "Owczarzak, Karolina  and
      Rankel, Peter A.  and
      Dang, Hoa Trang  and
      Conroy, John M.",
    booktitle = "Proceedings of the 50th Annual Meeting of the Association for Computational Linguistics (Volume 2: Short Papers)",
    month = jul,
    year = "2012",
    address = "Jeju Island, Korea",
    publisher = "Association for Computational Linguistics",
    url = "https://www.aclweb.org/anthology/P12-2070",
    pages = "359--362",
}
@inproceedings{choi-palmer-2012-fast,
    title = "Fast and Robust Part-of-Speech Tagging Using Dynamic Model Selection",
    author = "Choi, Jinho D.  and
      Palmer, Martha",
    booktitle = "Proceedings of the 50th Annual Meeting of the Association for Computational Linguistics (Volume 2: Short Papers)",
    month = jul,
    year = "2012",
    address = "Jeju Island, Korea",
    publisher = "Association for Computational Linguistics",
    url = "https://www.aclweb.org/anthology/P12-2071",
    pages = "363--367",
}
@inproceedings{gesmundo-samardzic-2012-lemmatisation,
    title = "Lemmatisation as a Tagging Task",
    author = "Gesmundo, Andrea  and
      Samard{\v{z}}i{\'c}, Tanja",
    booktitle = "Proceedings of the 50th Annual Meeting of the Association for Computational Linguistics (Volume 2: Short Papers)",
    month = jul,
    year = "2012",
    address = "Jeju Island, Korea",
    publisher = "Association for Computational Linguistics",
    url = "https://www.aclweb.org/anthology/P12-2072",
    pages = "368--372",
}
@inproceedings{baba-suzuki-2012-spelling,
    title = "How Are Spelling Errors Generated and Corrected? A Study of Corrected and Uncorrected Spelling Errors Using Keystroke Logs",
    author = "Baba, Yukino  and
      Suzuki, Hisami",
    booktitle = "Proceedings of the 50th Annual Meeting of the Association for Computational Linguistics (Volume 2: Short Papers)",
    month = jul,
    year = "2012",
    address = "Jeju Island, Korea",
    publisher = "Association for Computational Linguistics",
    url = "https://www.aclweb.org/anthology/P12-2073",
    pages = "373--377",
}
@inproceedings{dridan-oepen-2012-tokenization,
    title = "{T}okenization: Returning to a Long Solved Problem {---} A Survey, Contrastive Experiment, Recommendations, and Toolkit {---}",
    author = "Dridan, Rebecca  and
      Oepen, Stephan",
    booktitle = "Proceedings of the 50th Annual Meeting of the Association for Computational Linguistics (Volume 2: Short Papers)",
    month = jul,
    year = "2012",
    address = "Jeju Island, Korea",
    publisher = "Association for Computational Linguistics",
    url = "https://www.aclweb.org/anthology/P12-2074",
    pages = "378--382",
}
@inproceedings{magistry-sagot-2012-unsupervized,
    title = "Unsupervized Word Segmentation: the Case for {M}andarin {C}hinese",
    author = "Magistry, Pierre  and
      Sagot, Beno{\^\i}t",
    booktitle = "Proceedings of the 50th Annual Meeting of the Association for Computational Linguistics (Volume 2: Short Papers)",
    month = jul,
    year = "2012",
    address = "Jeju Island, Korea",
    publisher = "Association for Computational Linguistics",
    url = "https://www.aclweb.org/anthology/P12-2075",
    pages = "383--387",
}
@inproceedings{imamura-etal-2012-grammar,
    title = "Grammar Error Correction Using Pseudo-Error Sentences and Domain Adaptation",
    author = "Imamura, Kenji  and
      Saito, Kuniko  and
      Sadamitsu, Kugatsu  and
      Nishikawa, Hitoshi",
    booktitle = "Proceedings of the 50th Annual Meeting of the Association for Computational Linguistics (Volume 2: Short Papers)",
    month = jul,
    year = "2012",
    address = "Jeju Island, Korea",
    publisher = "Association for Computational Linguistics",
    url = "https://www.aclweb.org/anthology/P12-2076",
    pages = "388--392",
}
@proceedings{acl-2012-acl,
    title = "Proceedings of the {ACL} 2012 System Demonstrations",
    author = "Zhang, Min",
    month = jul,
    year = "2012",
    address = "Jeju Island, Korea",
    publisher = "Association for Computational Linguistics",
    url = "https://www.aclweb.org/anthology/P12-3000",
}
@inproceedings{huang-etal-2012-applications,
    title = "Applications of {GPC} Rules and Character Structures in Games for Learning {C}hinese Characters",
    author = "Huang, Wei-Jie  and
      Chou, Chia-Ru  and
      Tzeng, Yu-Lin  and
      Lee, Chia-Ying  and
      Liu, Chao-Lin",
    booktitle = "Proceedings of the {ACL} 2012 System Demonstrations",
    month = jul,
    year = "2012",
    address = "Jeju Island, Korea",
    publisher = "Association for Computational Linguistics",
    url = "https://www.aclweb.org/anthology/P12-3001",
    pages = "1--6",
}
@inproceedings{veale-li-2012-specifying,
    title = "Specifying Viewpoint and Information Need with Affective Metaphors: A System Demonstration of the Metaphor-Magnet Web App/Service",
    author = "Veale, Tony  and
      Li, Guofu",
    booktitle = "Proceedings of the {ACL} 2012 System Demonstrations",
    month = jul,
    year = "2012",
    address = "Jeju Island, Korea",
    publisher = "Association for Computational Linguistics",
    url = "https://www.aclweb.org/anthology/P12-3002",
    pages = "7--12",
}
@inproceedings{liu-etal-2012-quickview,
    title = "{Q}uick{V}iew: {NLP}-based Tweet Search",
    author = "Liu, Xiaohua  and
      Wei, Furu  and
      Zhou, Ming  and
      Microsoft, QuickView Team",
    booktitle = "Proceedings of the {ACL} 2012 System Demonstrations",
    month = jul,
    year = "2012",
    address = "Jeju Island, Korea",
    publisher = "Association for Computational Linguistics",
    url = "https://www.aclweb.org/anthology/P12-3003",
    pages = "13--18",
}
@inproceedings{xiao-etal-2012-niutrans,
    title = "{N}iu{T}rans: An Open Source Toolkit for Phrase-based and Syntax-based Machine Translation",
    author = "Xiao, Tong  and
      Zhu, Jingbo  and
      Zhang, Hao  and
      Li, Qiang",
    booktitle = "Proceedings of the {ACL} 2012 System Demonstrations",
    month = jul,
    year = "2012",
    address = "Jeju Island, Korea",
    publisher = "Association for Computational Linguistics",
    url = "https://www.aclweb.org/anthology/P12-3004",
    pages = "19--24",
}
@inproceedings{lui-baldwin-2012-langid,
    title = "langid.py: An Off-the-shelf Language Identification Tool",
    author = "Lui, Marco  and
      Baldwin, Timothy",
    booktitle = "Proceedings of the {ACL} 2012 System Demonstrations",
    month = jul,
    year = "2012",
    address = "Jeju Island, Korea",
    publisher = "Association for Computational Linguistics",
    url = "https://www.aclweb.org/anthology/P12-3005",
    pages = "25--30",
}
@inproceedings{aw-lee-2012-personalized,
    title = "Personalized Normalization for a Multilingual Chat System",
    author = "Aw, Ai Ti  and
      Lee, Lian Hau",
    booktitle = "Proceedings of the {ACL} 2012 System Demonstrations",
    month = jul,
    year = "2012",
    address = "Jeju Island, Korea",
    publisher = "Association for Computational Linguistics",
    url = "https://www.aclweb.org/anthology/P12-3006",
    pages = "31--36",
}
@inproceedings{banchs-li-2012-iris,
    title = "{IRIS}: a Chat-oriented Dialogue System based on the Vector Space Model",
    author = "Banchs, Rafael E.  and
      Li, Haizhou",
    booktitle = "Proceedings of the {ACL} 2012 System Demonstrations",
    month = jul,
    year = "2012",
    address = "Jeju Island, Korea",
    publisher = "Association for Computational Linguistics",
    url = "https://www.aclweb.org/anthology/P12-3007",
    pages = "37--42",
}
@inproceedings{vasiljevs-etal-2012-letsmt,
    title = "{L}ets{MT}!: Cloud-Based Platform for Do-It-Yourself Machine Translation",
    author = {Vasi{\c{l}}jevs, Andrejs  and
[truncated: 35,307,590 more chars]
