# Supplementary material
Source: ML conference proceedings conference paper supplement (https://aclanthology.org/2020.alw-1.9)
Supplement: OptionalSupplementaryMaterial [file 2020.alw-1.9.OptionalSupplementaryMaterial.zip › main.bib]

@inproceedings{badjatiya:gupta:ea:19,
	Address = {San Francisco, CA},
	Author = {Badjatiya, Pinkesh and Manish Gupta and Vasudeva Varma},
	Booktitle = { WWW '19: The World Wide Web Conference},
	Date-Added = {2020-10-09 18:44:47 +0200},
	Date-Modified = {2020-10-09 18:46:58 +0200},
	Pages = {49--59},
	Title = {Stereotypical Bias Removal for Hate Speech Detection Task Using Knowledge-Based Generalizations},
	Year = {2019}}

@inproceedings{davidson-etal-2019-racial,
    title = "Racial Bias in Hate Speech and Abusive Language Detection Datasets",
    author = "Davidson, Thomas  and
      Bhattacharya, Debasmita  and
      Weber, Ingmar",
    booktitle = "Proceedings of the Third Workshop on Abusive Language Online",
    year = "2019",
    address = "Florence, Italy",
    url = "https://www.aclweb.org/anthology/W19-3504",
    doi = "10.18653/v1/W19-3504",
    pages = "25--35",
}

@inproceedings{van-rosendaal-etal-2020-lower,
    title = "Lower Bias, Higher Density Abusive Language Datasets: A Recipe",
    author = "van Rosendaal, Juliet  and
      Caselli, Tommaso  and
      Nissim, Malvina",
    booktitle = "Proceedings of the LREC Workshop on Resources and Techniques for User and Author Profiling in Abusive Language",
    year = "2020",
    address = "Marseille, France",
    url = "https://www.aclweb.org/anthology/2020.restup-1.4",
    pages = "14--19",
}

@inproceedings{sap-etal-2019-risk,
    title = "The Risk of Racial Bias in Hate Speech Detection",
    author = "Sap, Maarten  and
      Card, Dallas  and
      Gabriel, Saadia  and
      Choi, Yejin  and
      Smith, Noah A.",
    booktitle = "Proceedings of the 57th Annual Meeting of the Association for Computational Linguistics",
    year = "2019",
    address = "Florence, Italy",
    url = "https://www.aclweb.org/anthology/P19-1163",
    doi = "10.18653/v1/P19-1163",
    pages = "1668--1678",
 }

@inproceedings{park:shin:ea:18,
    title = "Reducing Gender Bias in Abusive Language Detection",
    author = "Park, Ji Ho  and
      Shin, Jamin  and
      Fung, Pascale",
    booktitle = "Proceedings of the Conference on Empirical Methods in Natural Language Processing (EMNLP)",
    year = "2018",
    address = "Brussels, Belgium",
    url = "https://www.aclweb.org/anthology/D18-1302",
    doi = "10.18653/v1/D18-1302",
    pages = "2799--2804",
}


@inproceedings{he:zha:ea:19,
    title = "Unlearn Dataset Bias in Natural Language Inference by Fitting the Residual",
    author = "He, He  and
      Zha, Sheng  and
      Wang, Haohan",
    booktitle = "Proceedings of the 2nd Workshop on Deep Learning Approaches for Low-Resource NLP (DeepLo 2019)",
    year = "2019",
    address = "Hong Kong, China",
    url = "https://www.aclweb.org/anthology/D19-6115",
    doi = "10.18653/v1/D19-6115",
    pages = "132--142",
}

@article{pedregosa:varoquaux:ea:11,
	Author = {Pedregosa, Fabian and Varoquaux, Ga{\"e}l and Gramfort, Alexandre and Michel, Vincent and Thirion, Bertrand and Grisel, Olivier and Blondel, Mathieu and Prettenhofer, Peter and Weiss, Ron and Dubourg, Vincent and others},
	Journal = {Journal of Machine Learning Research},
	Pages = {2825--2830},
	Title = {Scikit-learn: Machine learning in {Python}},
	Volume = {12},
	Year = {2011}}

@inproceedings{wulczyn:thain:ea:17,
	Address = {Perth, Australia},
	Author = {Wulczyn, Ellery and Thain, Nithum and Dixon, Lucas},
	Booktitle = {Proceedings of the International World Wide Web Conference (WWW)},
	Pages = {1391--1399},
	Title = {{Ex Machina}: Personal Attacks Seen at Scale},
	Year = {2017}}

@inproceedings{kumar:ojha:ea:18,
    title = "Benchmarking Aggression Identification in Social Media",
    author = "Kumar, Ritesh  and
      Ojha, Atul Kr.  and
      Malmasi, Shervin  and
      Zampieri, Marcos",
    booktitle = "Proceedings of the First Workshop on Trolling, Aggression and Cyberbullying ({TRAC})",
    month = aug,
    year = "2018",
    address = "Santa Fe, NM",
    url = "https://www.aclweb.org/anthology/W18-4401",
    pages = "1--11",
 }

@inproceedings{warner:hirschberg:12,
    title = "Detecting Hate Speech on the {World Wide Web}",
    author = "Warner, William  and       Hirschberg, Julia",
    booktitle = "Proceedings of the Second Workshop on Language in Social Media",
    month = jun,
    year = "2012",
    address = "Montr{\'e}al, Canada",
    url = "https://www.aclweb.org/anthology/W12-2103",
    pages = "19--26",
}

@inproceedings{waseem:hovy:16,
    title = "Hateful Symbols or Hateful People? {P}redictive Features for Hate Speech Detection on Twitter",
    author = "Waseem, Zeerak  and       Hovy, Dirk",
    booktitle = "Proceedings of the {NAACL} Student Research Workshop",
    month = jun,
    year = "2016",
    address = "San Diego, CA",
    url = "https://www.aclweb.org/anthology/N16-2013",
    doi = "10.18653/v1/N16-2013",
    pages = "88--93",
}

@inproceedings{wiegand:ruppenhofer:ea:19,
    title = "Detection of Abusive Language: {T}he Problem of Biased Datasets",
    author = "Wiegand, Michael  and
      Ruppenhofer, Josef  and
      Kleinbauer, Thomas",
    booktitle = "Proceedings of the 2019 Conference of the North {A}merican Chapter of the Association for Computational Linguistics: Human Language Technologies",
    month = jun,
    year = "2019",
    address = "Minneapolis, MN",
    url = "https://www.aclweb.org/anthology/N19-1060",
    doi = "10.18653/v1/N19-1060",
    pages = "602--608"}

@inproceedings{wiegand:ruppenhofer:ea:18,
    title = "Inducing a Lexicon of Abusive Words {--} a Feature-Based Approach",
    author = "Wiegand, Michael  and
      Ruppenhofer, Josef  and
      Schmidt, Anna  and
      Greenberg, Clayton",
    booktitle = "Proceedings of the 2018 Conference of the North {A}merican Chapter of the Association for Computational Linguistics: Human Language Technologies",
    month = jun,
    year = "2018",
    address = "New Orleans, LA",
    url = "https://www.aclweb.org/anthology/N18-1095",
    doi = "10.18653/v1/N18-1095",
    pages = "1046--1056"}

@ONLINE {kaggle,
    author = "Jigsaw",
    title  = "Jigsaw Unintended Bias in Toxicity Classification",
    month  = "mar",
    year   = "2019",
    url    = "https://www.kaggle.com/c/jigsaw-unintended-bias-in-toxicity-classification"
}

@ONLINE {sklearn,
    author = "Scikit-learn",
    title  = "Scikit-learn: Machine Learning in Python",
    month  = "",
    year   = "2020",
    url    = "https://scikit-learn.org/"
}
